# Supplementary material for: Understanding M–ligand bonding and mer-/fac-isomerism in tris(8-hydroxyquinolinate) metallic complexes
Source: Royal Society of Chemistry journal article supplement (doi:10.1039/c6cp02608g), 2016-01-01
Supplement: c6cp02608g1.pdf [file c6cp02608g1.pdf]

**Understanding M–ligand bonding and *mer-/fac-* isomerism in  
tris(8-hydroxyquinolate) metallic complexes**

**(Supplementary Information)**

**Carlos F. R. A. C. Lima,<sup>\*ab</sup> Ricardo J. S. Taveira,<sup>a</sup> José C. S. Costa,<sup>ac</sup> Ana M. Fernandes,<sup>b</sup>**

**André Melo,<sup>d</sup> Artur M. S. Silva<sup>b</sup> and Luís M. N. B. F. Santos<sup>\*a</sup>**

<sup>a</sup> CIQ, Departamento de Química e Bioquímica, Faculdade de Ciências da Universidade do Porto, Porto, Portugal.

<sup>b</sup> Department of Chemistry & QOPNA, University of Aveiro, Aveiro, Portugal.

<sup>c</sup> LEPABE, Faculdade de Engenharia da Universidade do Porto, Porto, Portugal.

<sup>d</sup> LAQV-REQUIMTE, Departamento de Química e Bioquímica, Faculdade de Ciências da Universidade do Porto, Porto, Portugal.

\* Corresponding authors:

Carlos F. R. A. C. Lima, Luís M. N. B. F. Santos

CIQ, Departamento de Química e Bioquímica, Faculdade de Ciências da Universidade do Porto, P-4169-007 Porto, Portugal.

E-mail: [carlos.chemistry@gmail.com](mailto:carlos.chemistry@gmail.com), [lbsantos@fc.up.pt](mailto:lbsantos@fc.up.pt)

## **Contents**

**Section S1. Synthesis and characterization ..... S1**

**Section S2. Mass spectrometry analysis ..... S32**

**Section S3. Quantum chemistry calculations ..... S34**

## Section S1. Synthesis and characterization

### S1.1. Synthesis

**Table S1.** Detailed results for the synthesis of the Al(III) metallic complexes.

| Compound                    | $m(8\text{-Hq}) / \text{g}$ | $m(\text{Al}^{3+})^a / \text{g}$ | $m(\text{KOH}) / \text{g}$ | $m(\text{Mq}_3) / \text{g}$ | Yield % |
|-----------------------------|-----------------------------|----------------------------------|----------------------------|-----------------------------|---------|
| $\text{Alq}_3$              | 1.42                        | 0.65                             | 1.22                       | 0.65                        | 52      |
| $\text{Al}(\text{qCH}_3)_3$ | 0.72                        | 0.38                             | 0.09                       | 0.54                        | 68      |
| $\text{Al}(\text{qNO}_2)_3$ | 0.90                        | 0.38                             | 0.09                       | 0.66                        | 70      |
| $\text{Al}(\text{qCl})_3$   | 0.69                        | 0.14                             | 0.24                       | 0.52                        | 71      |
| $\text{Al}(\text{qBr})_3$   | 0.91                        | 0.14                             | 0.29                       | 0.59                        | 75      |

<sup>a</sup> Corresponds to  $\text{AlCl}_3 \cdot 6\text{H}_2\text{O}$ .

**Table S2.** Detailed results for the synthesis of the In(III) metallic complexes.

| Compound                    | $m(8\text{-Hq}) / \text{g}$ | $m(\text{Al}^{3+})^a / \text{g}$ | $m(\text{KOH}) / \text{g}$ | $m(\text{Mq}_3) / \text{g}$ | Yield % |
|-----------------------------|-----------------------------|----------------------------------|----------------------------|-----------------------------|---------|
| $\text{Inq}_3$              | 0.97                        | 0.41                             | 1.06                       | 1.01                        | 84      |
| $\text{In}(\text{qCH}_3)_3$ | 0.72                        | 0.23                             | 0.29                       | 0.56                        | 68      |
| $\text{In}(\text{qNO}_2)_3$ | 0.97                        | 0.21                             | 0.29                       | 0.70                        | 72      |
| $\text{In}(\text{qCl})_3$   | 0.78                        | 0.22                             | 0.31                       | 0.67                        | 76      |
| $\text{In}(\text{qBr})_3$   | 1.01                        | 0.21                             | 0.27                       | 0.74                        | 69      |

<sup>a</sup> Corresponds to  $\text{InCl}_3$ .

## S1.2. FTIR

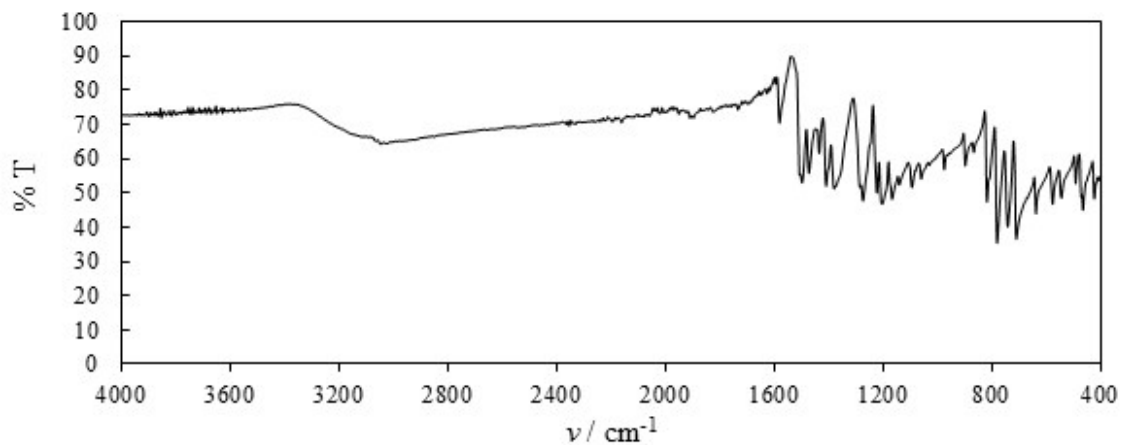

**Figure S1.** FTIR spectrum of 8-hydroxyquinoline (8-Hq).

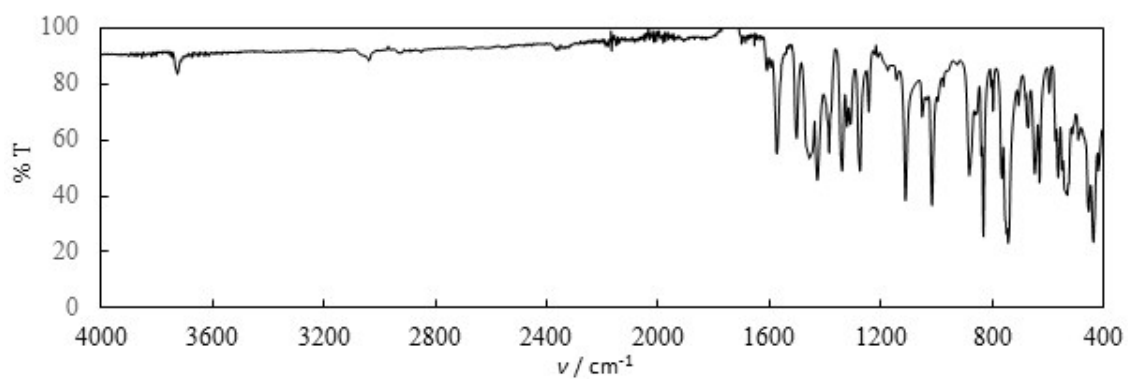

**Figure S2.** FTIR spectrum of  $\text{Al}(\text{qCH}_3)_3$ .

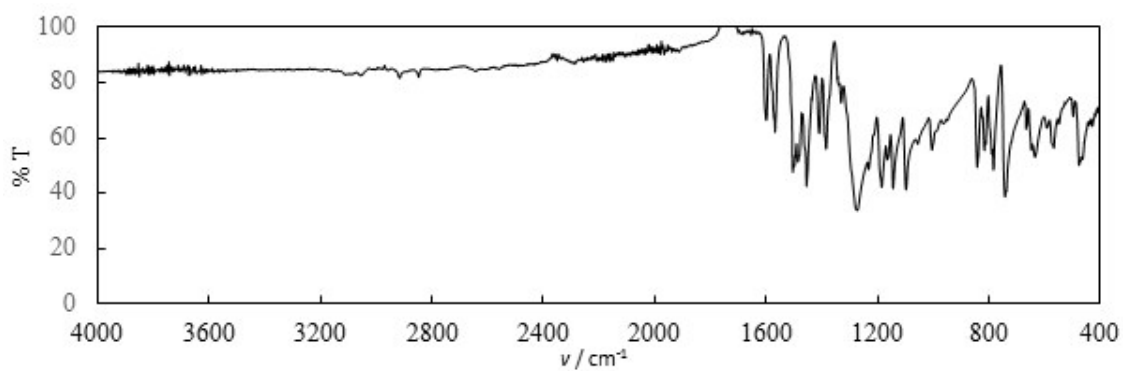

**Figure S3.** FTIR spectrum of  $\text{Al}(\text{qNO}_2)_3$ .

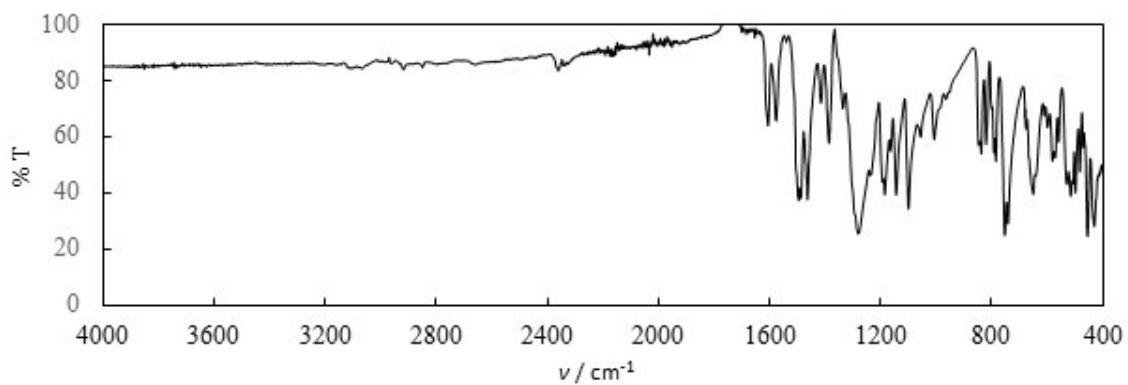

**Figure S4.** FTIR spectrum of  $\text{Al}(\text{qCl})_3$ .

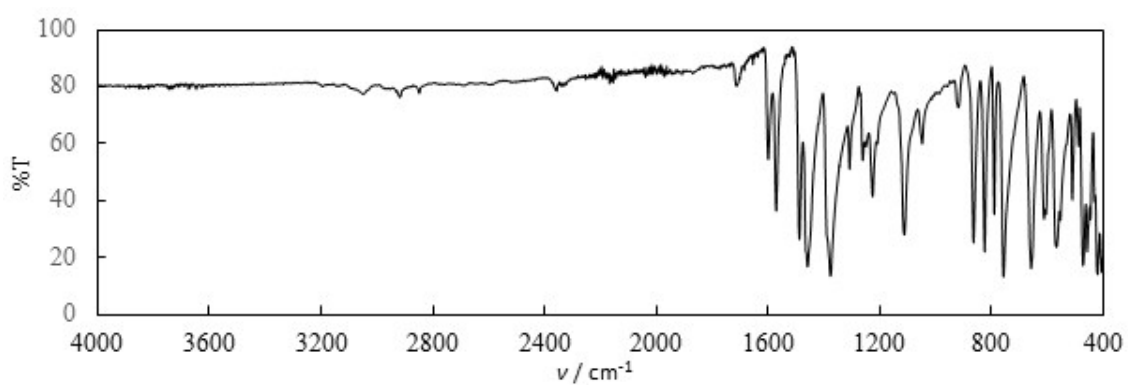

**Figure S5.** FTIR spectrum of  $\text{Al}(\text{qBr})_3$ .

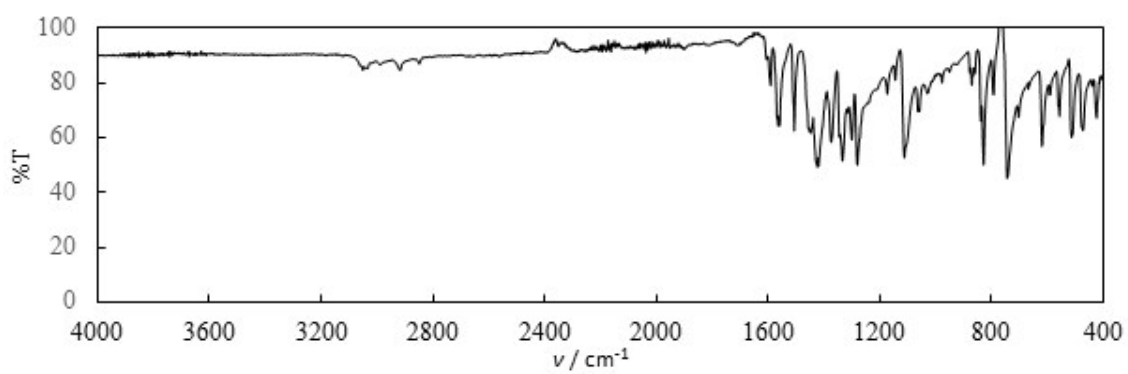

**Figure S6.** FTIR spectrum of  $\text{In}(\text{qCH}_3)_3$ .

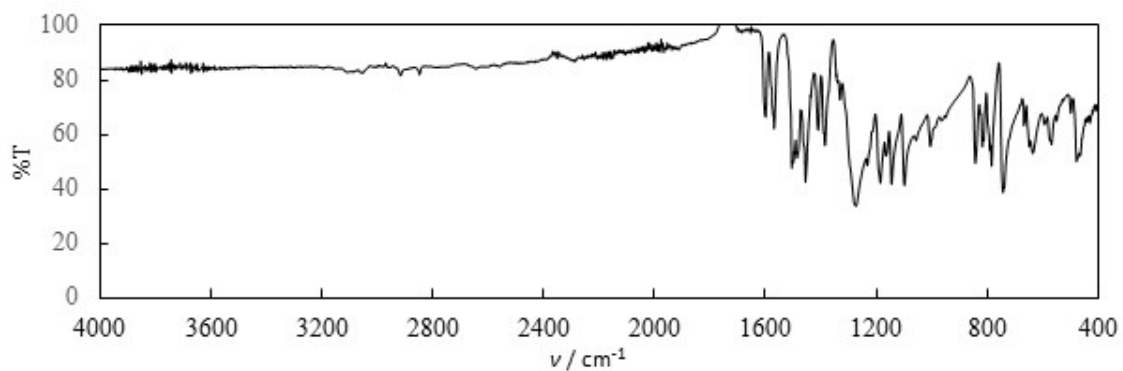

**Figure S7.** FTIR spectrum of  $\text{In}(\text{qNO}_2)_3$ .

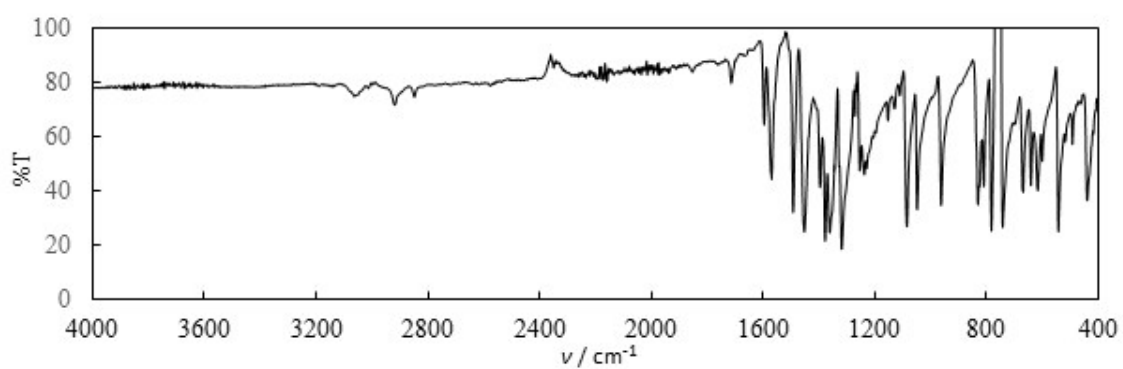

**Figure S8.** FTIR spectrum of  $\text{In}(\text{qCl})_3$ .

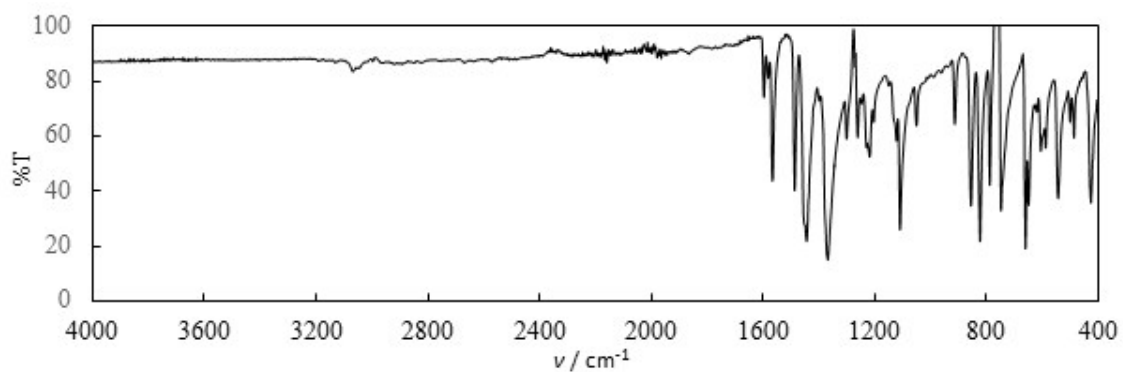

**Figure S9.** FTIR spectrum of  $\text{In}(\text{qBr})_3$ .

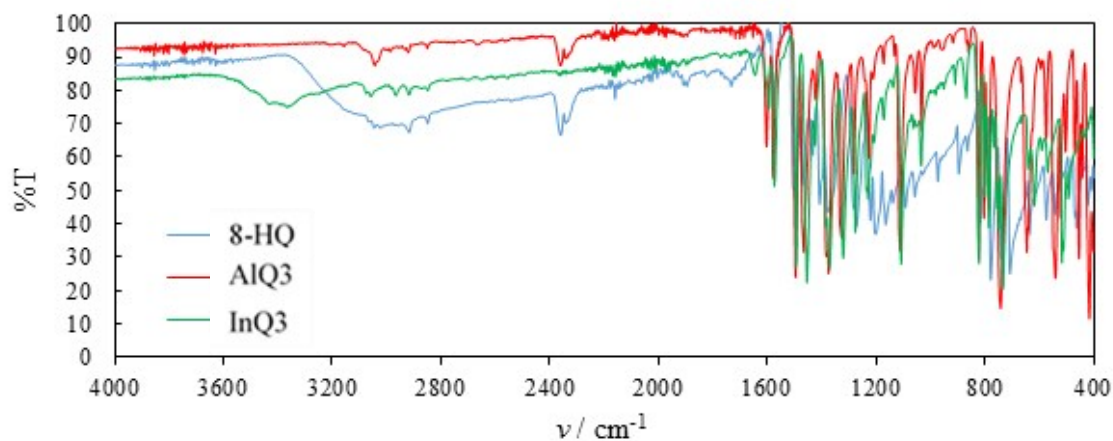

**Figure S10.** Comparison between the FTIR spectra of 8-Hq(blue), Alq<sub>3</sub> (red), and Inq<sub>3</sub> (blue) in the selected region.

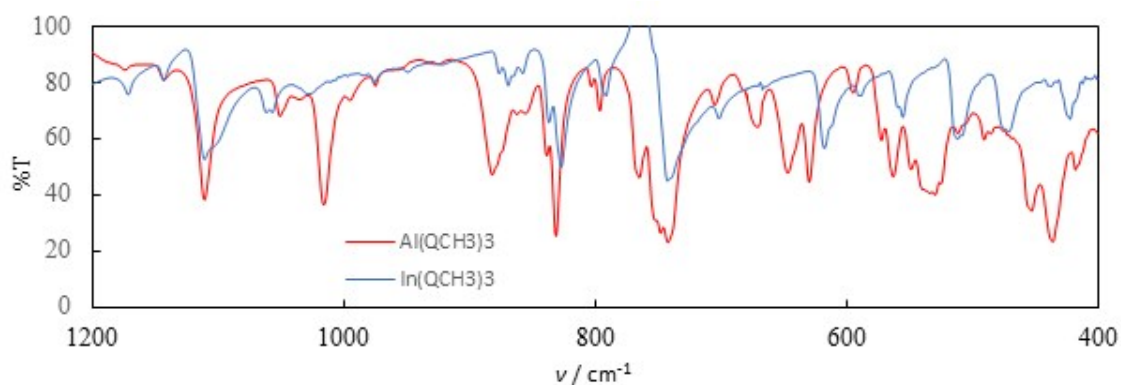

**Figure S11.** Comparison between the FTIR spectra of Al(qCH<sub>3</sub>)<sub>3</sub> (red) and In(qCH<sub>3</sub>)<sub>3</sub> (blue) in the selected region.

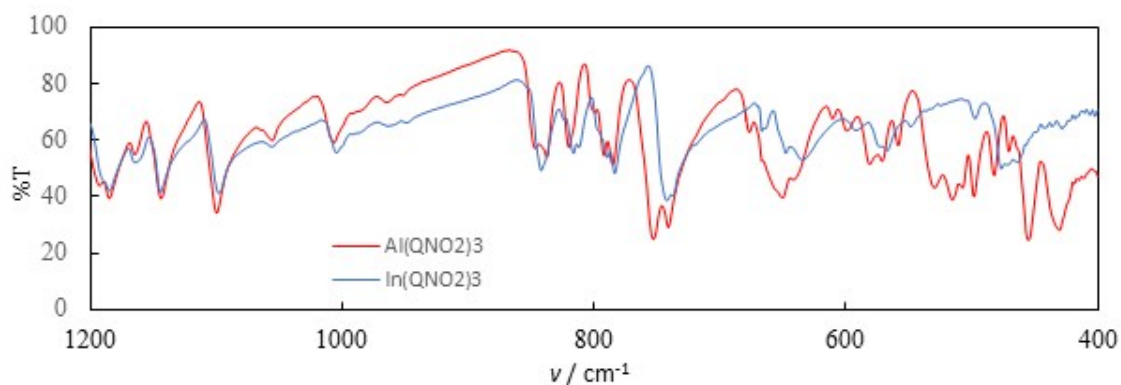

**Figure S12.** Comparison between the FTIR spectra of Al(qNO<sub>2</sub>)<sub>3</sub> (red) and In(qNO<sub>2</sub>)<sub>3</sub> (blue) in the selected region.

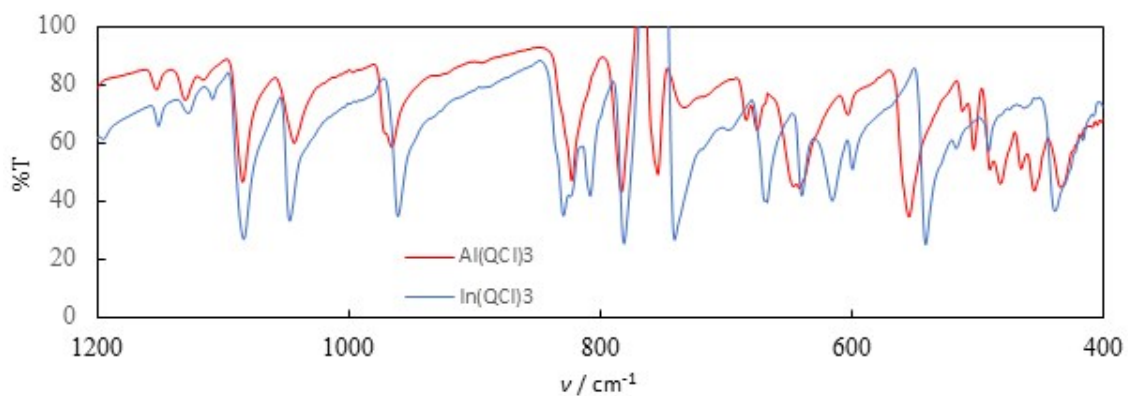

**Figure S13.** Comparison between the FTIR spectra of  $\text{Al}(\text{qCl})_3$  (red) and  $\text{In}(\text{qCl})_3$  (blue) in the selected region.

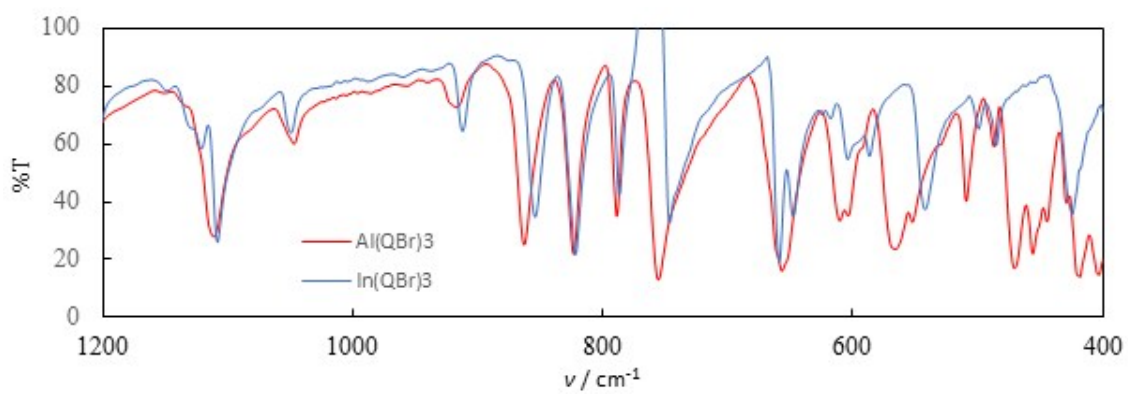

**Figure S14.** Comparison between the FTIR spectra of  $\text{Al}(\text{qBr})_3$  (red) and  $\text{In}(\text{qBr})_3$  (blue) in the selected region.



### S1.3. UV-Vis

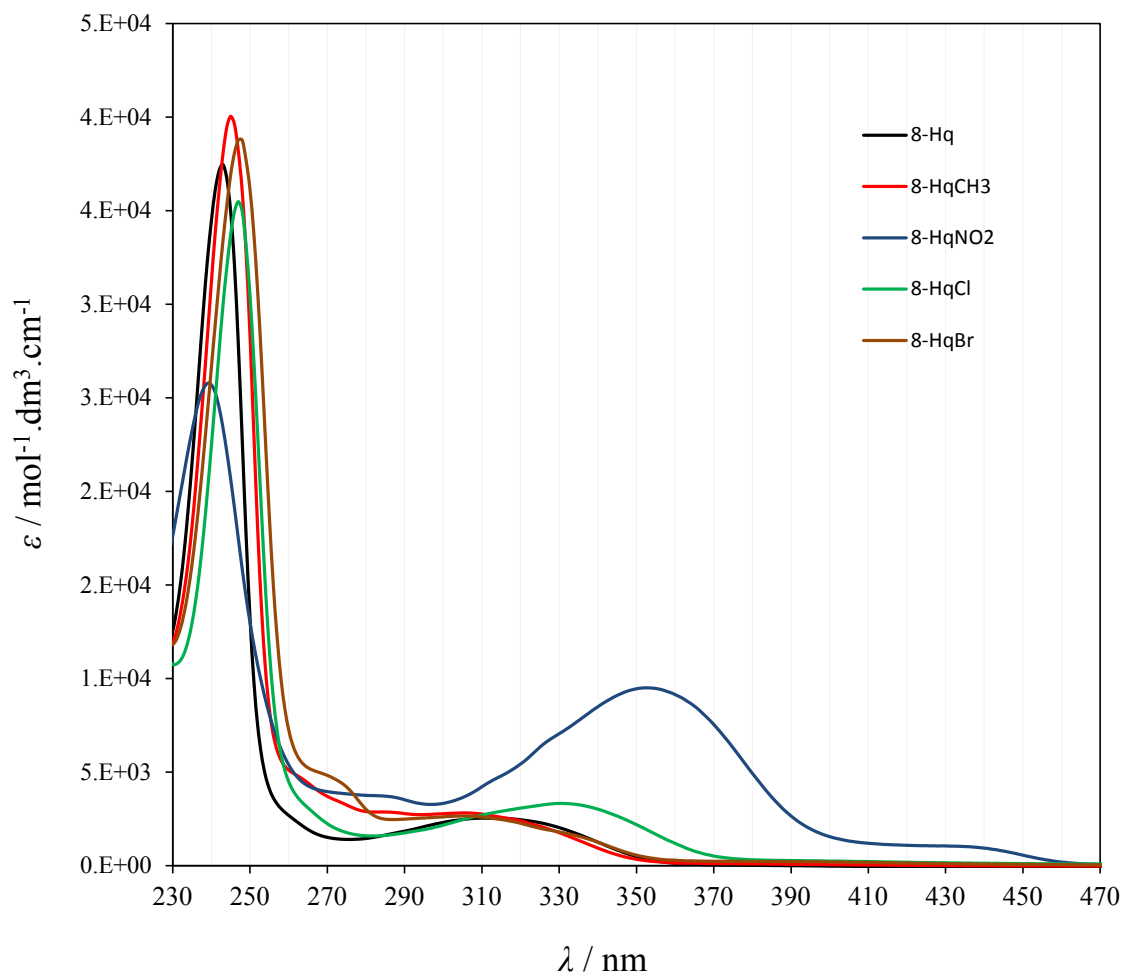

**Figure S15.** UV-Vis spectra of the 8-hydroxyquinolines studied in CH<sub>2</sub>Cl<sub>2</sub>.

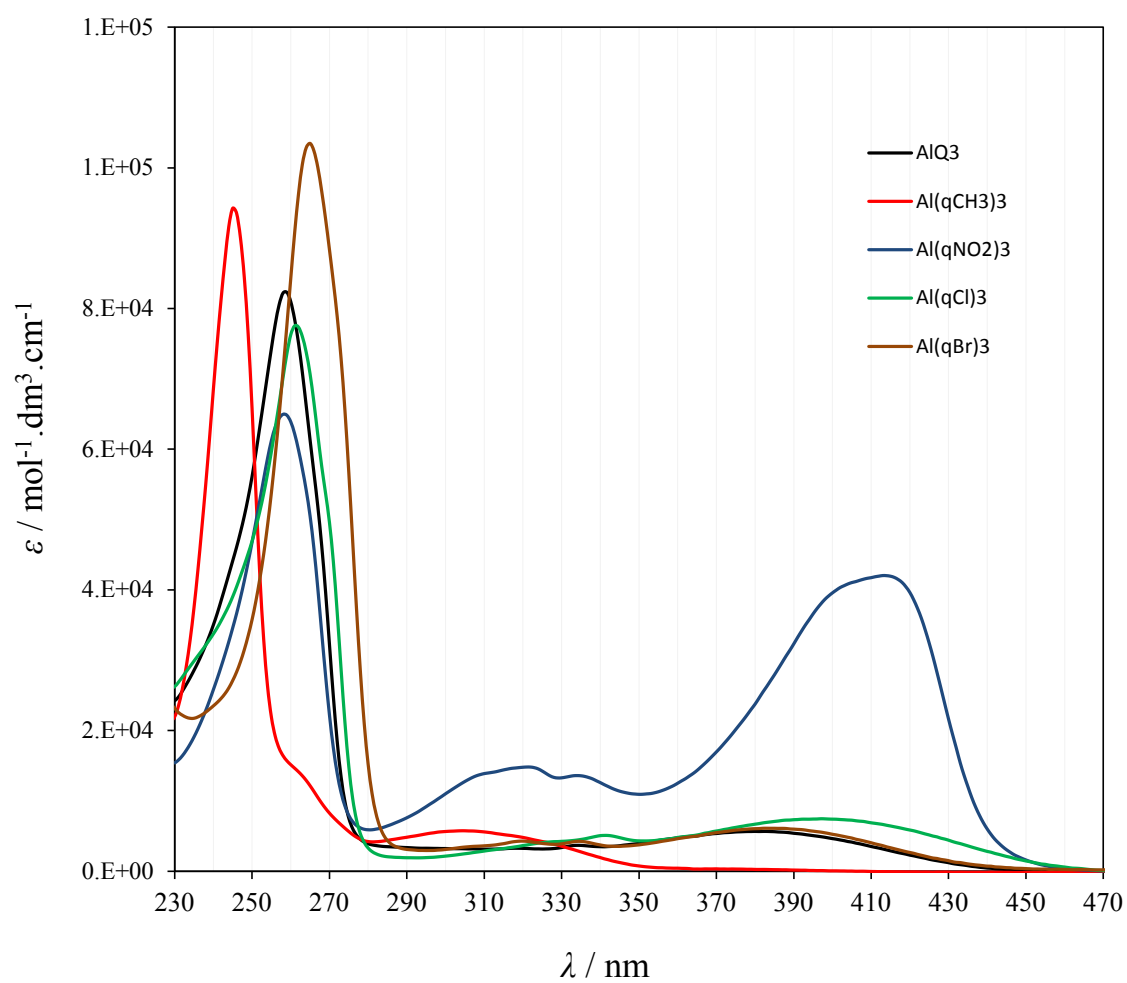

**Figure S16.** UV-Vis spectra of the Al(III) complexes studied in CH<sub>2</sub>Cl<sub>2</sub>.

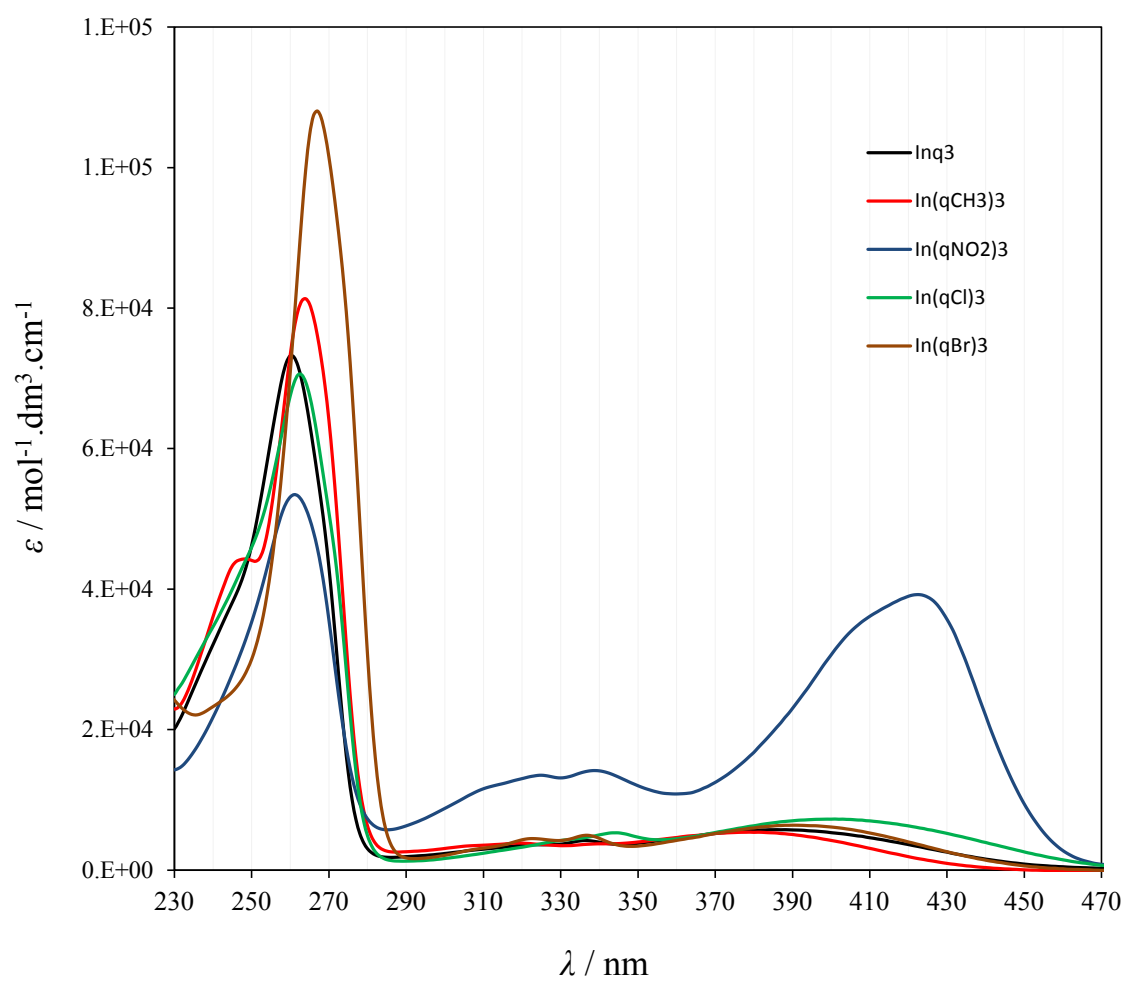

**Figure S17.** UV-Vis spectra of the In(III) complexes studied in  $\text{CH}_2\text{Cl}_2$ .

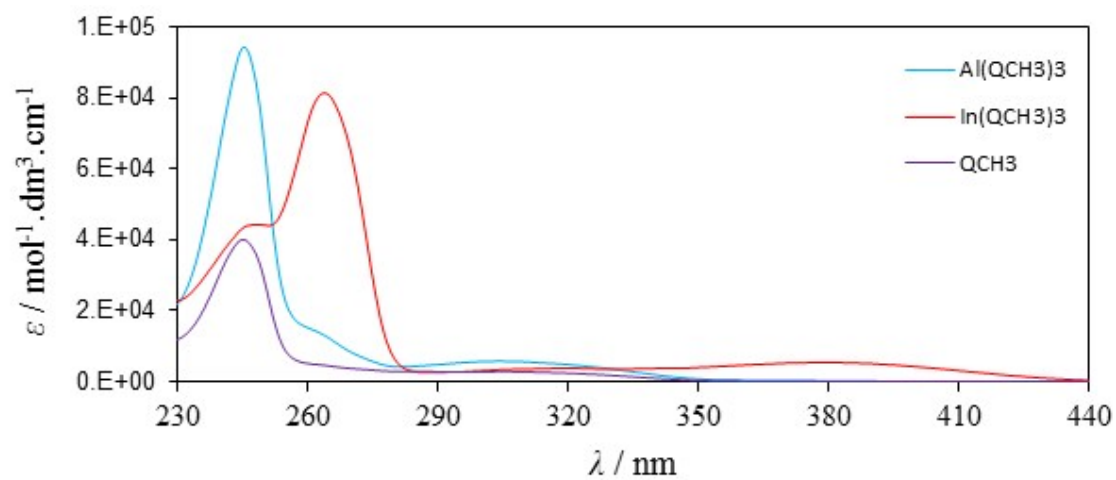

**Figure S18.** Comparison between the UV-Vis spectra of  $\text{Al}(\text{qCH}_3)_3$  (blue),  $\text{In}(\text{qCH}_3)_3$  (red), and  $\text{QCH}_3$  (purple) in  $\text{CH}_2\text{Cl}_2$ .

**Table S3.** Sample concentrations used in the complexation study of  $\text{In}(\text{qCH}_3)_3$  by UV-Vis spectroscopy.

| Entry | $[\text{In}(\text{qCH}_3)_3] \cdot 10^5 / \text{mol} \cdot \text{dm}^{-3}$ |
|-------|----------------------------------------------------------------------------|
| 1     | 0.229                                                                      |
| 2     | 0.460                                                                      |
| 3     | 0.611                                                                      |
| 4     | 0.881                                                                      |
| 5     | 1.03                                                                       |
| 6     | 1.20                                                                       |
| 7     | 1.35                                                                       |
| 8     | 1.53                                                                       |

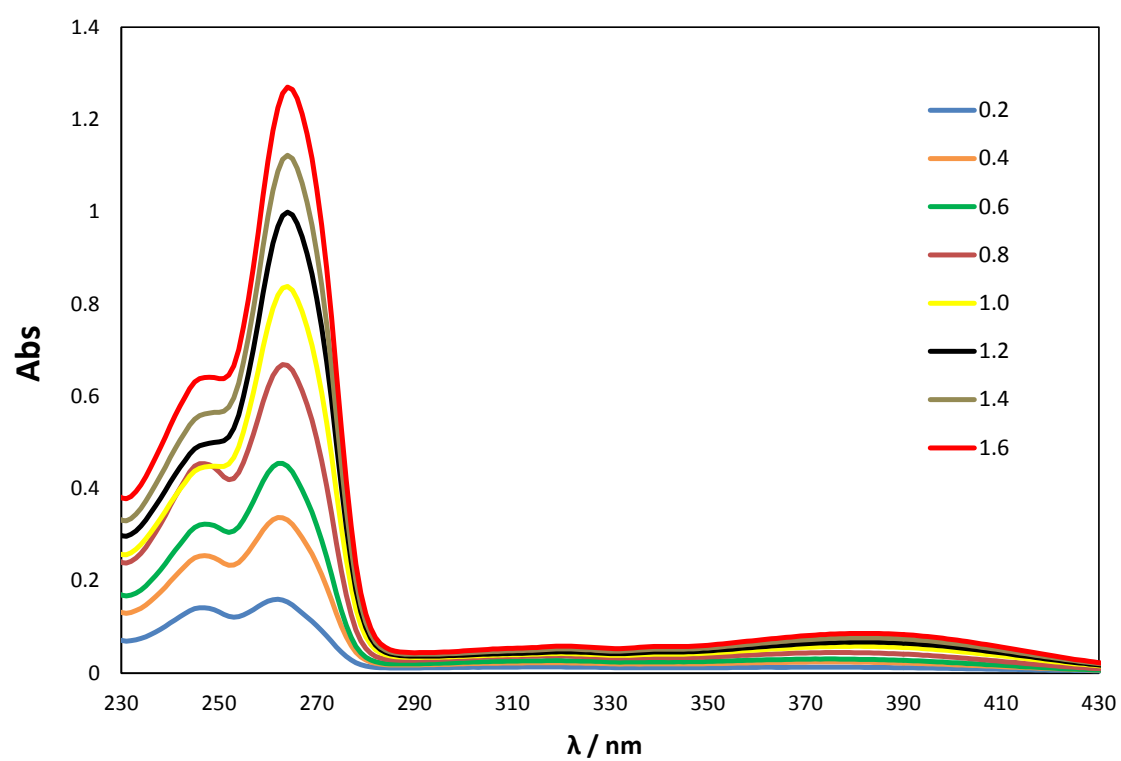

**Figure S19.** Complexation study of  $\text{In}(\text{qCH}_3)_3$  in  $\text{CH}_2\text{Cl}_2$ .

## S1.4. NMR spectroscopy

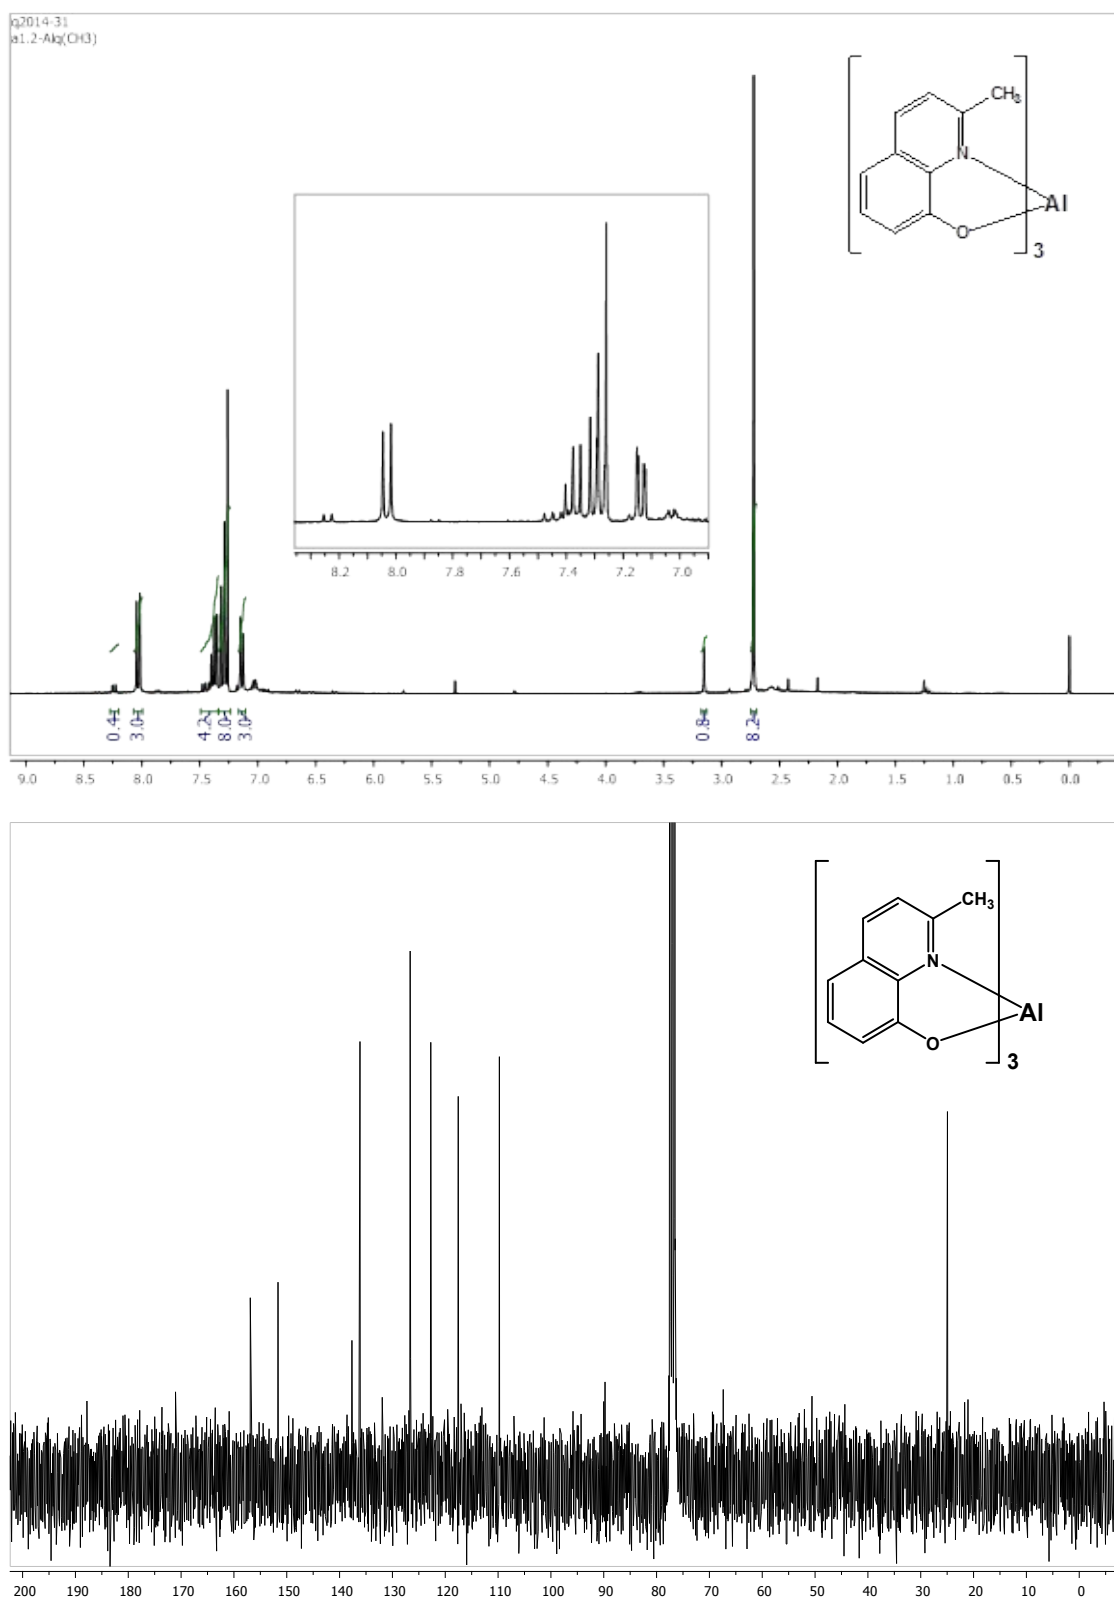

**Figure S20.**  $^1\text{H}$  and  $^{13}\text{C}$  NMR spectra of  $\text{Al}(\text{qCH}_3)_3$  in  $\text{CDCl}_3$ .

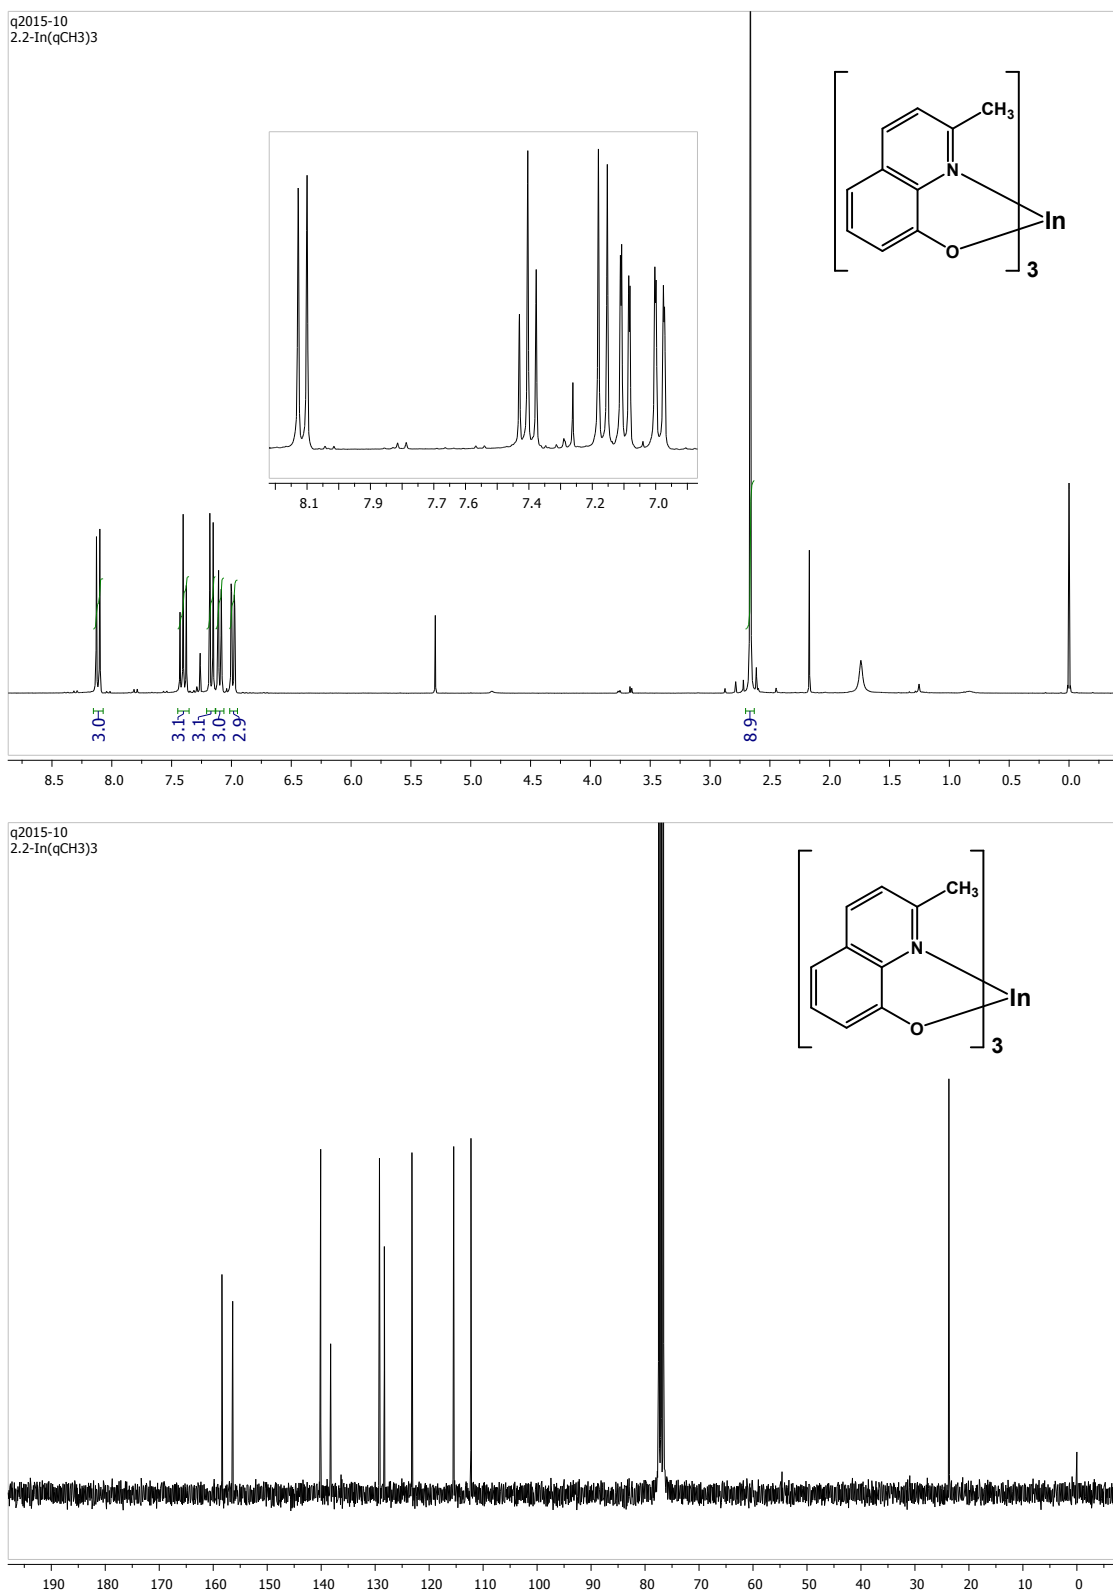

**Figure S21.** <sup>1</sup>H and <sup>13</sup>C NMR spectra of In(qCH<sub>3</sub>)<sub>3</sub> in CDCl<sub>3</sub>.

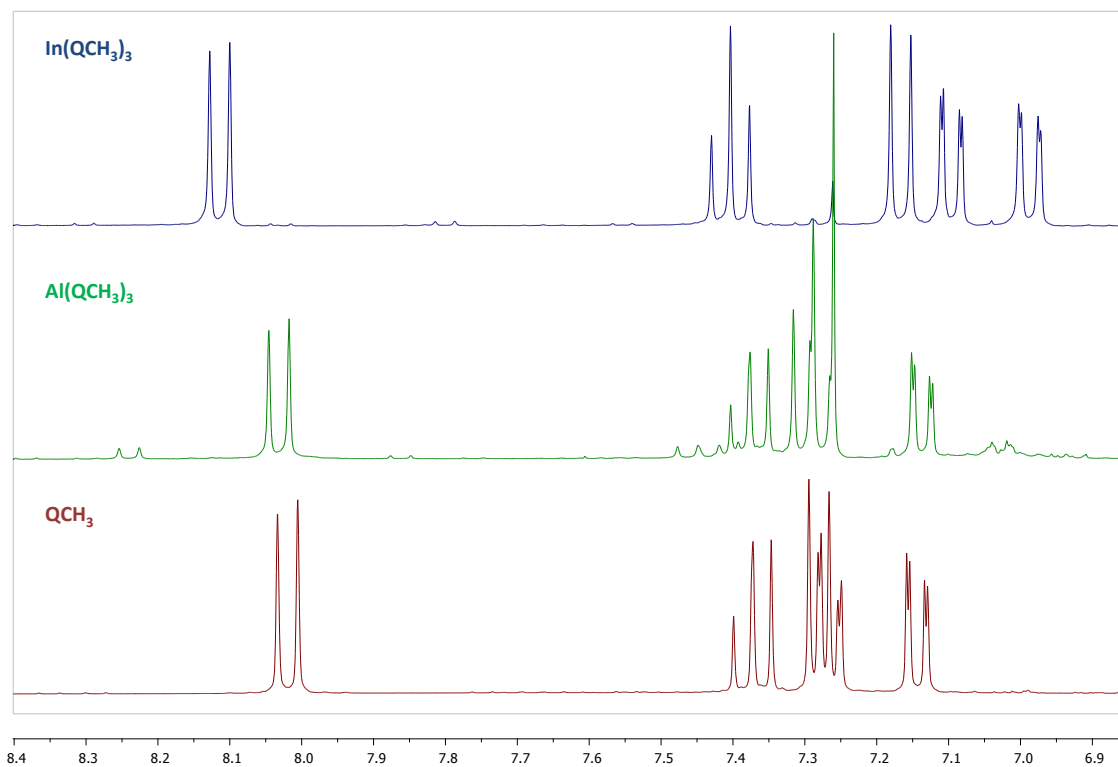

**Figure S22.** Comparison between the <sup>1</sup>H NMR spectra of  $\text{qCH}_3$  (8-hydroxyquinoline),  $\text{Al}(\text{qCH}_3)_3$  and  $\text{In}(\text{qCH}_3)_3$  in  $\text{CDCl}_3$ .

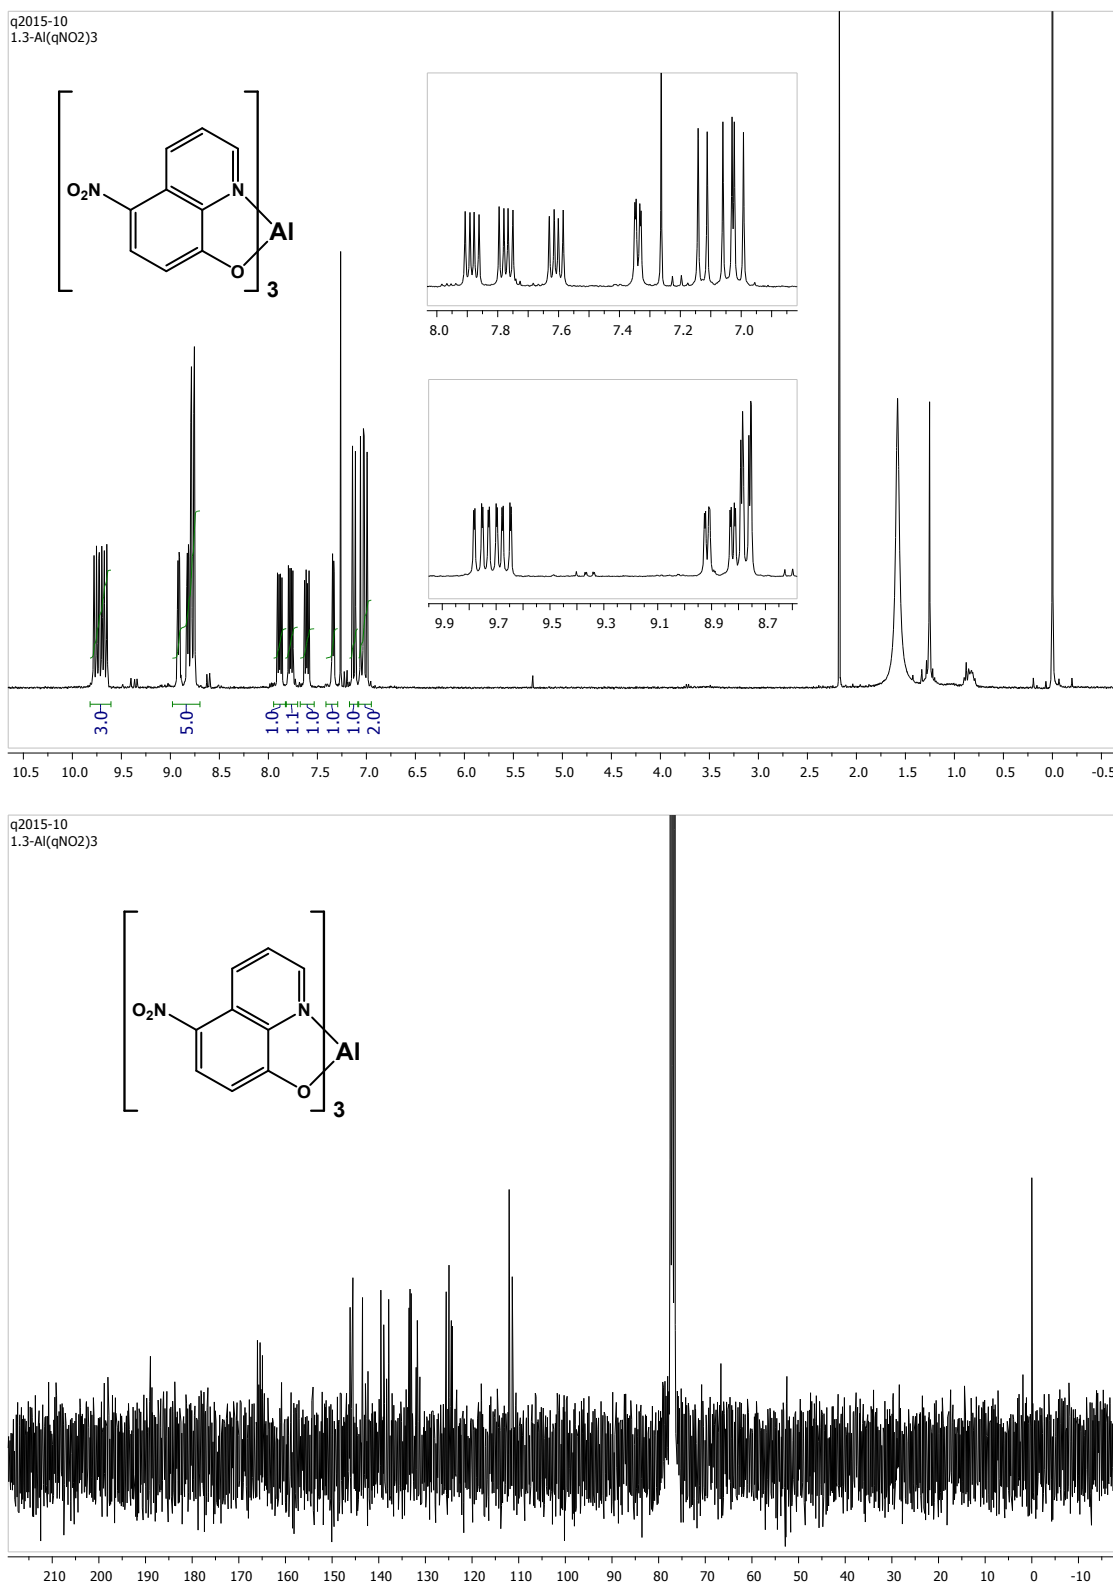

**Figure S23.**  $^1\text{H}$  and  $^{13}\text{C}$  NMR spectra of  $\text{Al}(\text{qNO}_2)_3$  in  $\text{CDCl}_3$ .



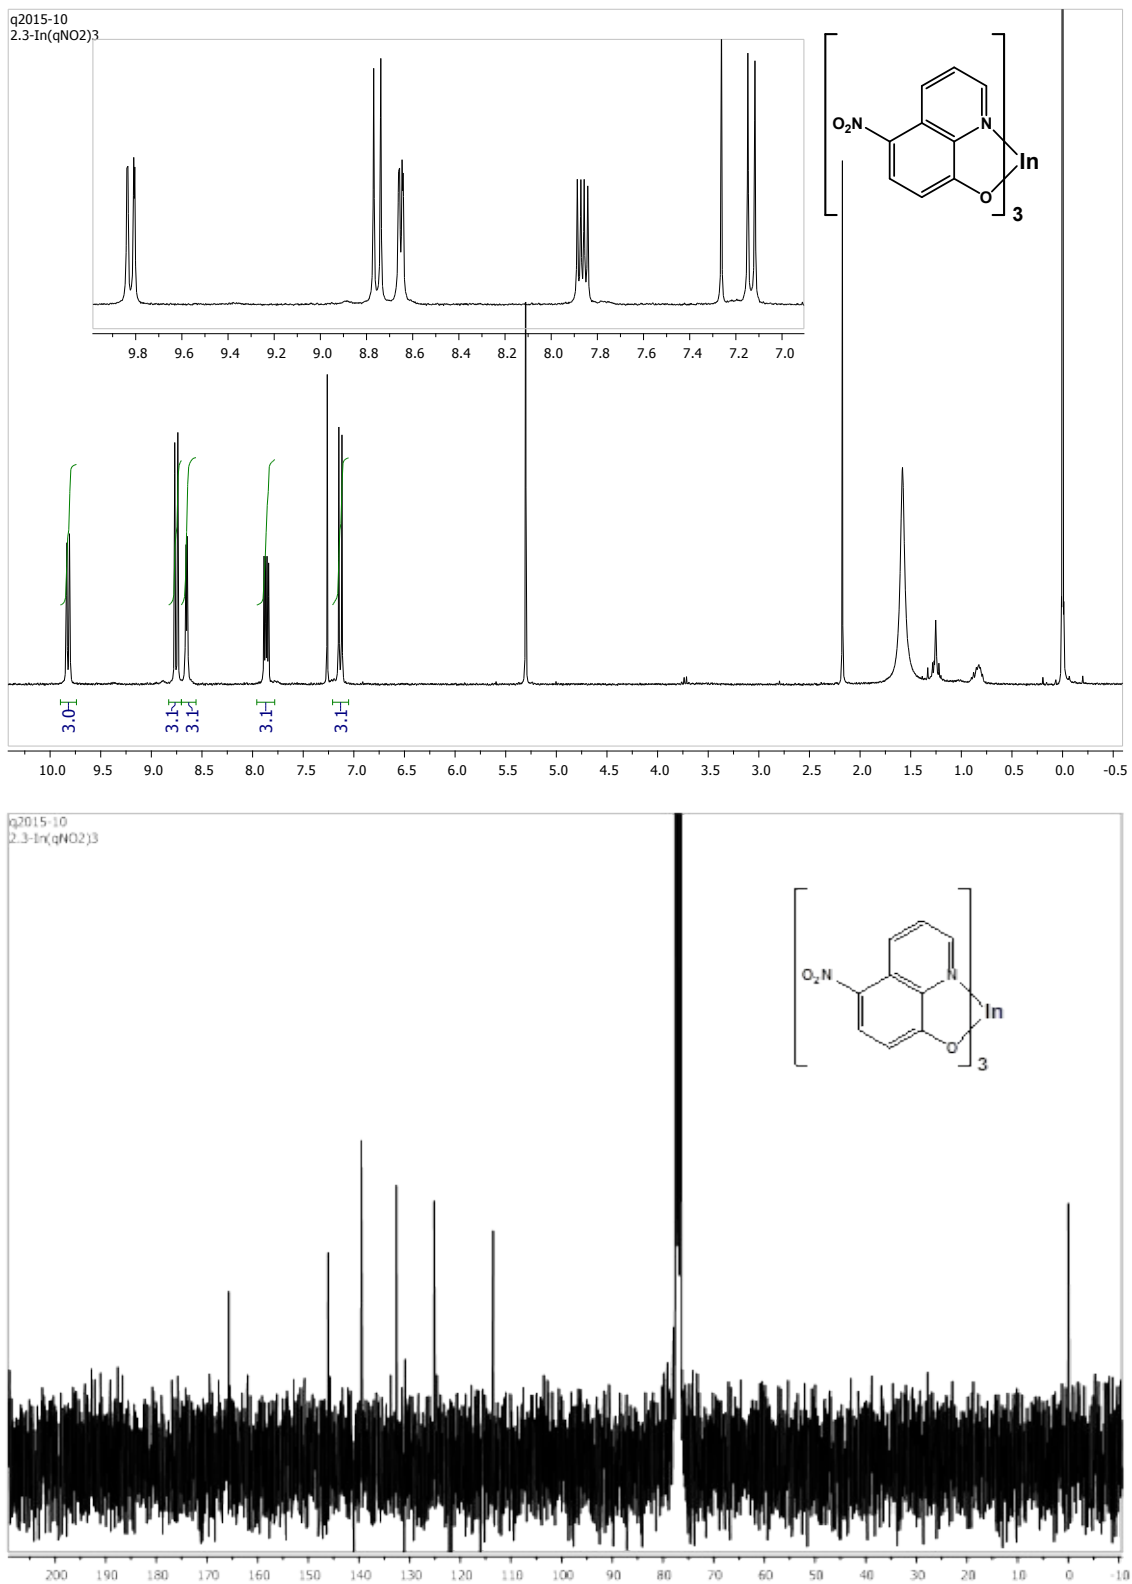

**Figure S24.**  $^1\text{H}$  and  $^{13}\text{C}$  NMR spectra of  $\text{In}(\text{qNO}_2)_3$  in  $\text{CDCl}_3$ .

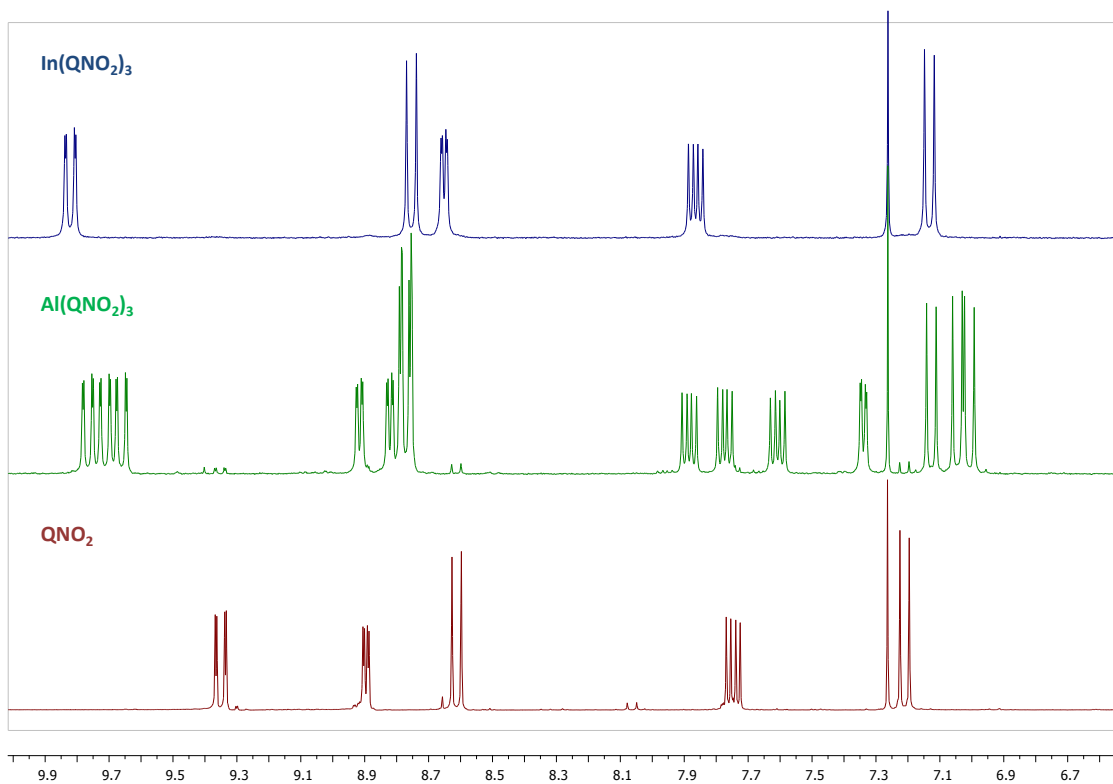

**Figure S25.** Comparison between the <sup>1</sup>H NMR spectra of qNO<sub>2</sub> (5-nitro-8-hydroxyquinoline), Al(qNO<sub>2</sub>)<sub>3</sub> and In(qNO<sub>2</sub>)<sub>3</sub> in CDCl<sub>3</sub>.

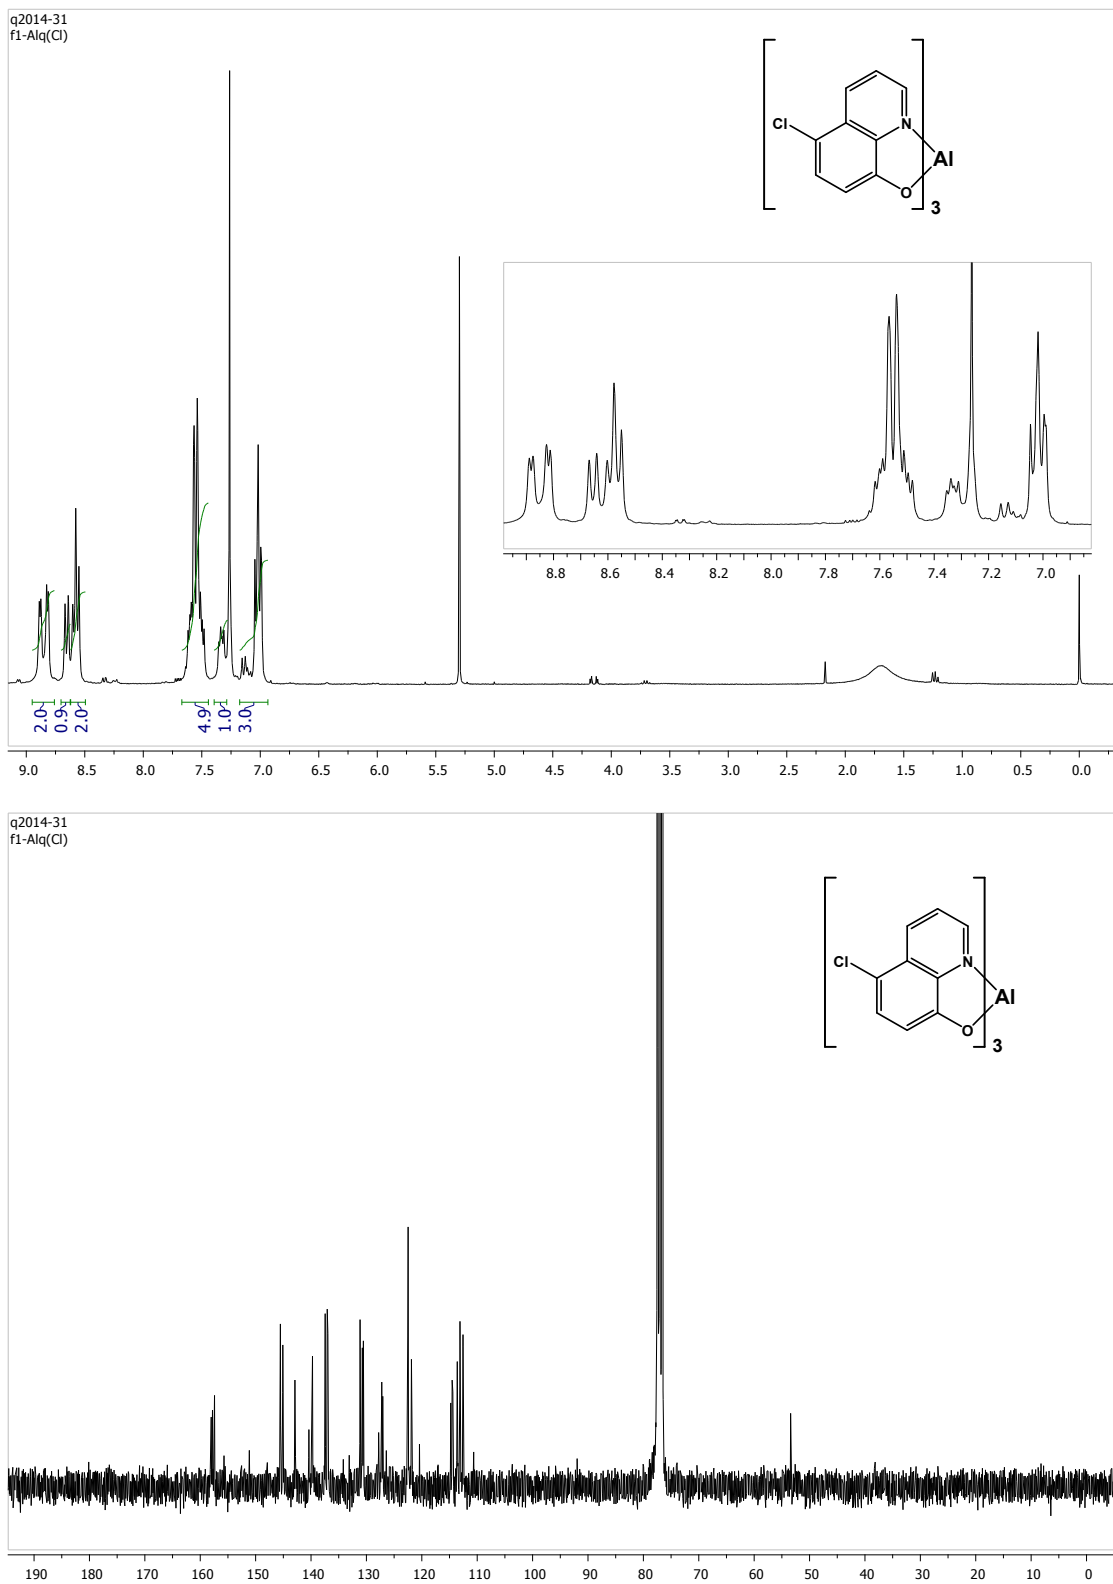

**Figure S26.**  $^1\text{H}$  and  $^{13}\text{C}$  NMR spectra of  $\text{Al}(\text{qCl})_3$  in  $\text{CDCl}_3$ .

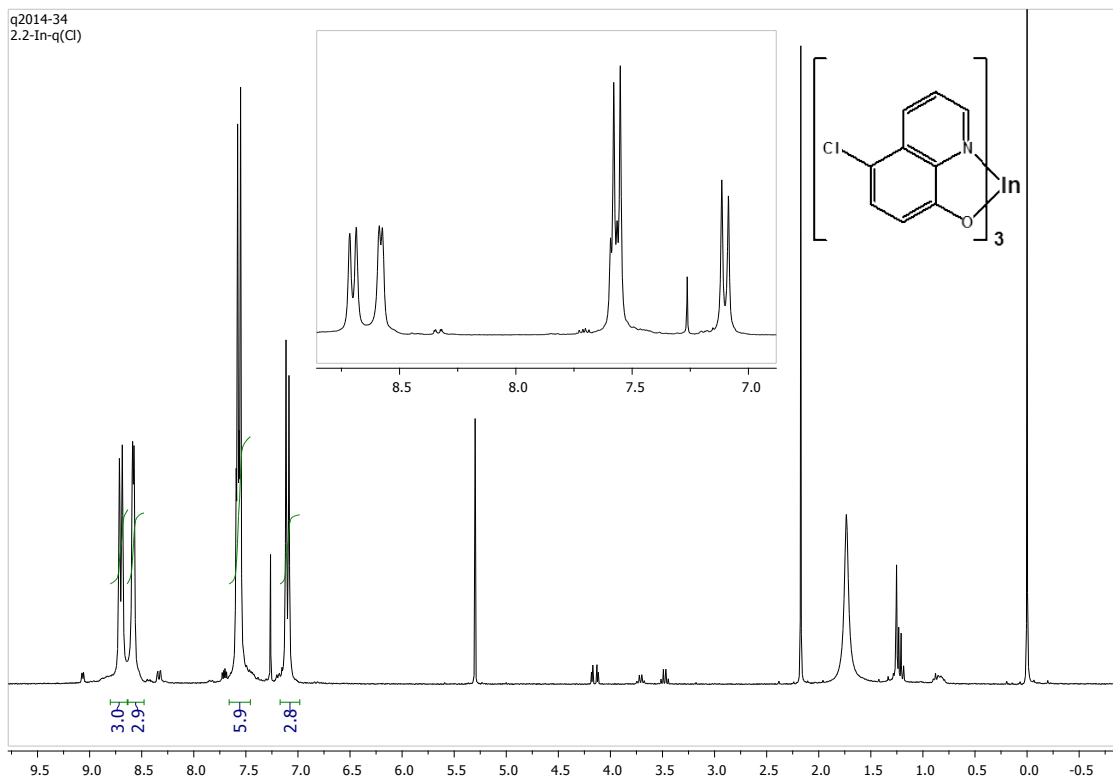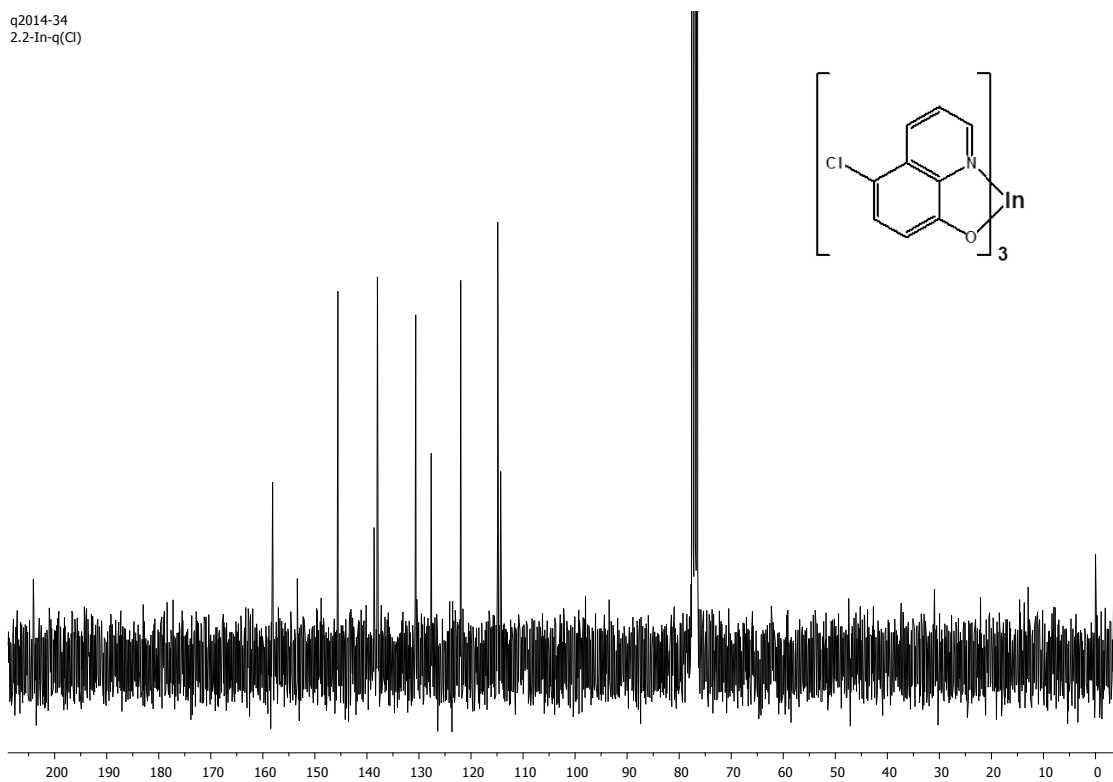

**Figure S27.**  $^1\text{H}$  and  $^{13}\text{C}$  NMR spectra of  $\text{In}(\text{qCl})_3$  in  $\text{CDCl}_3$ .

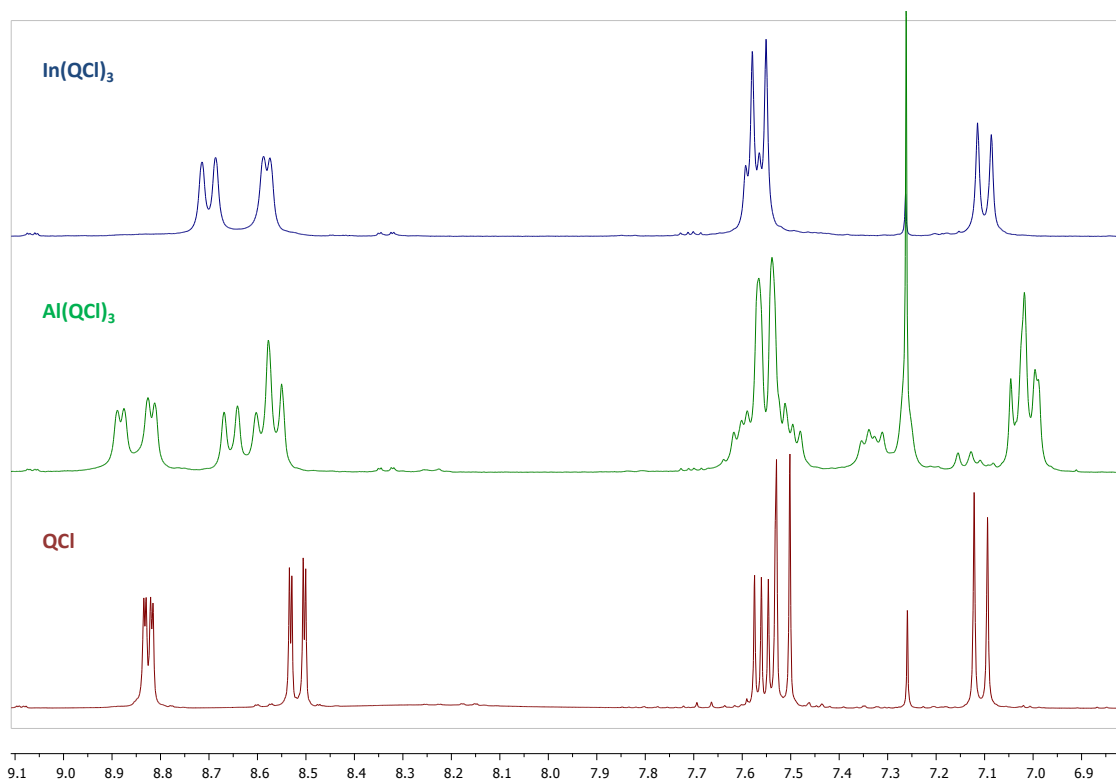

**Figure S28.** Comparison between the <sup>1</sup>H NMR spectra of qCl (5-chloro-8-hydroxyquinoline), Al(qCl)<sub>3</sub> and In(qCl)<sub>3</sub> in CDCl<sub>3</sub>.

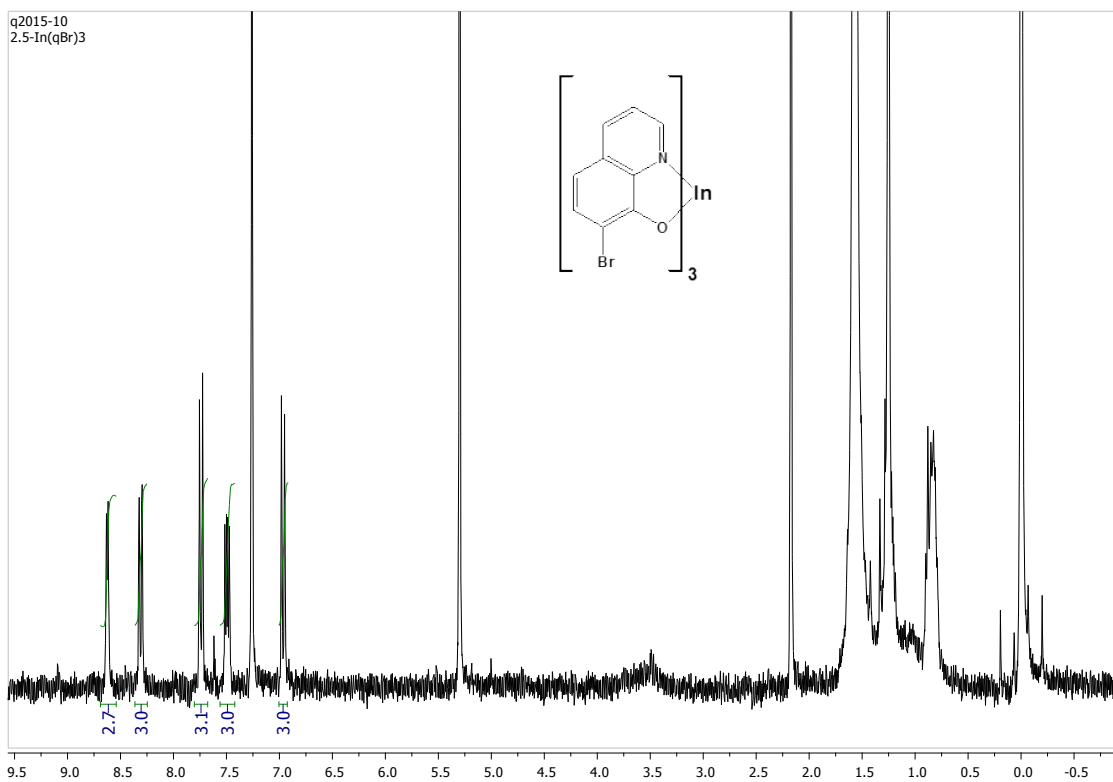

**Figure S29.** <sup>1</sup>H NMR spectrum of In(qBr)<sub>3</sub> in CDCl<sub>3</sub>.

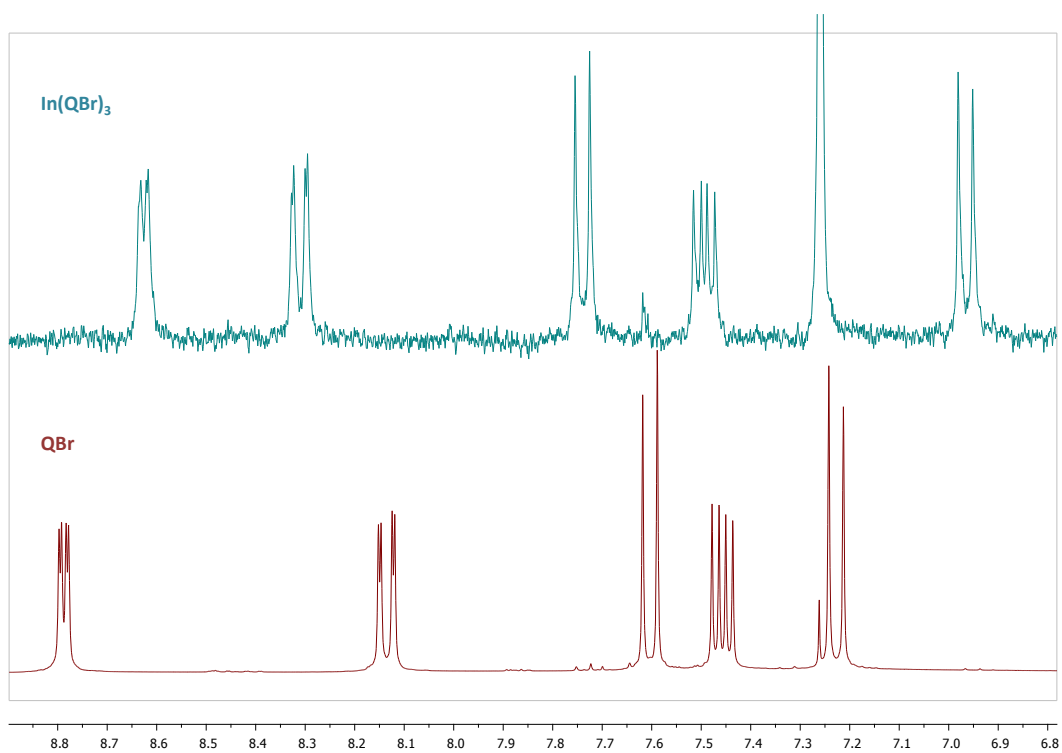

**Figure S30.** Comparison between the <sup>1</sup>H NMR spectra of qBr (7-bromo-8-hydroxyquinoline) and In(QBr)<sub>3</sub> in CDCl<sub>3</sub>.

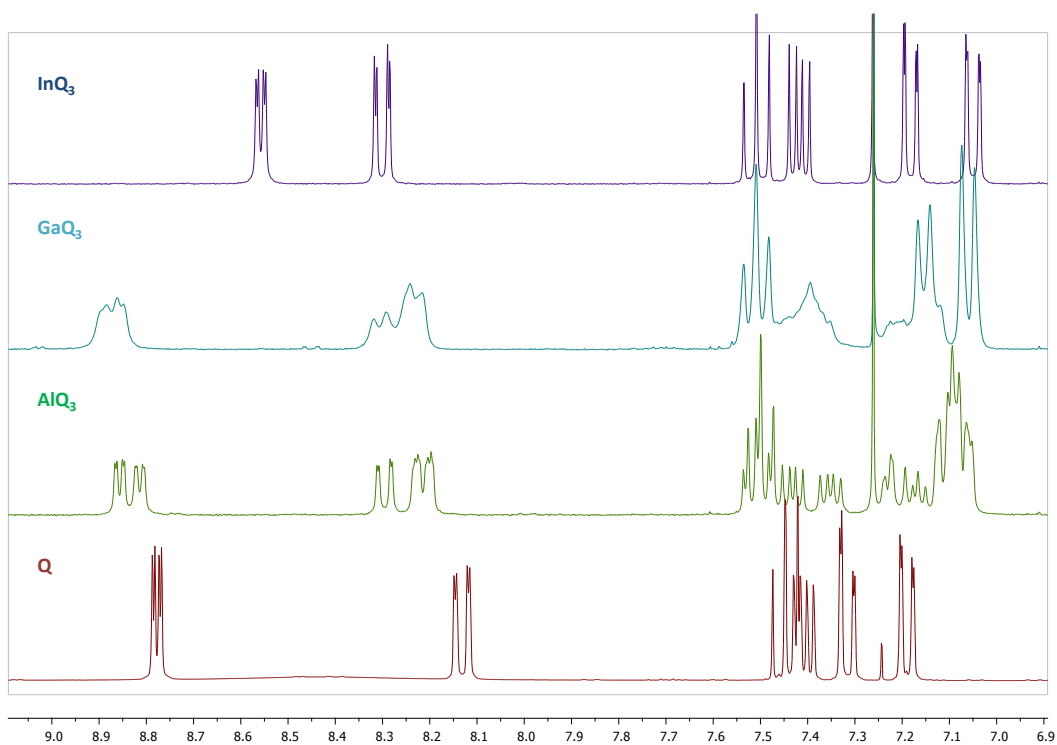

**Figure S31.** Comparison between the  $^1\text{H}$  NMR spectra of q (8-hydroxyquinoline),  $\text{AlQ}_3$ ,  $\text{GaQ}_3$  and  $\text{InQ}_3$  in  $\text{CDCl}_3$ .

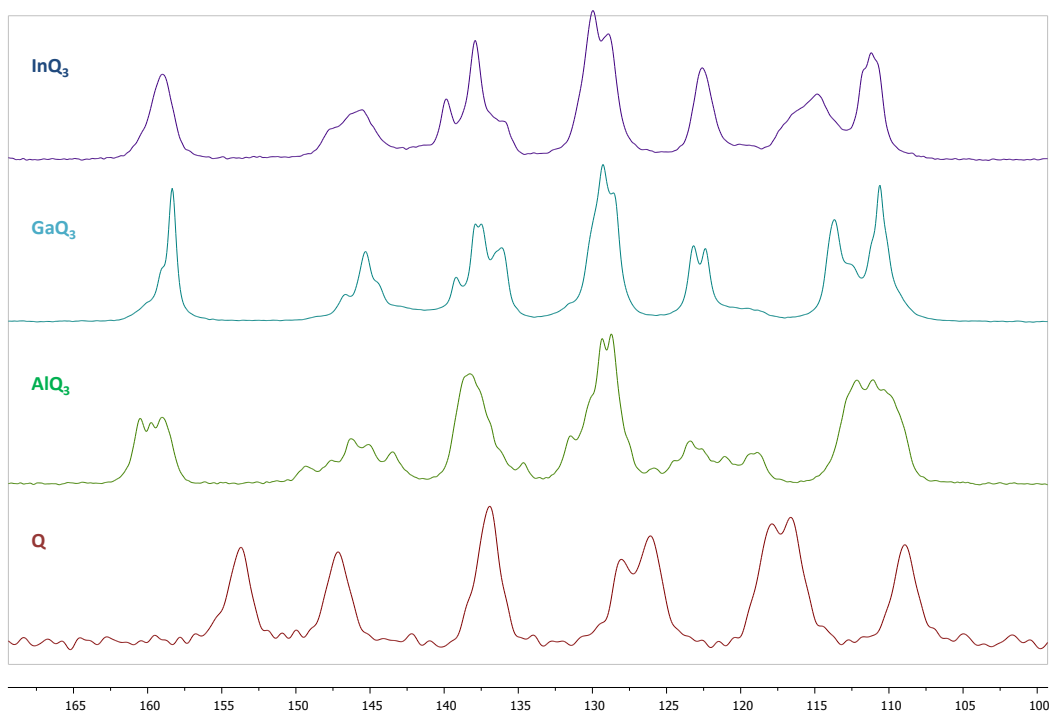

**Figure S32.** Comparison between the  $^{13}\text{C}$  CPMAS NMR spectra of solid q (8-hydroxyquinoline),  $\text{AlQ}_3$ ,  $\text{GaQ}_3$  and  $\text{InQ}_3$ .

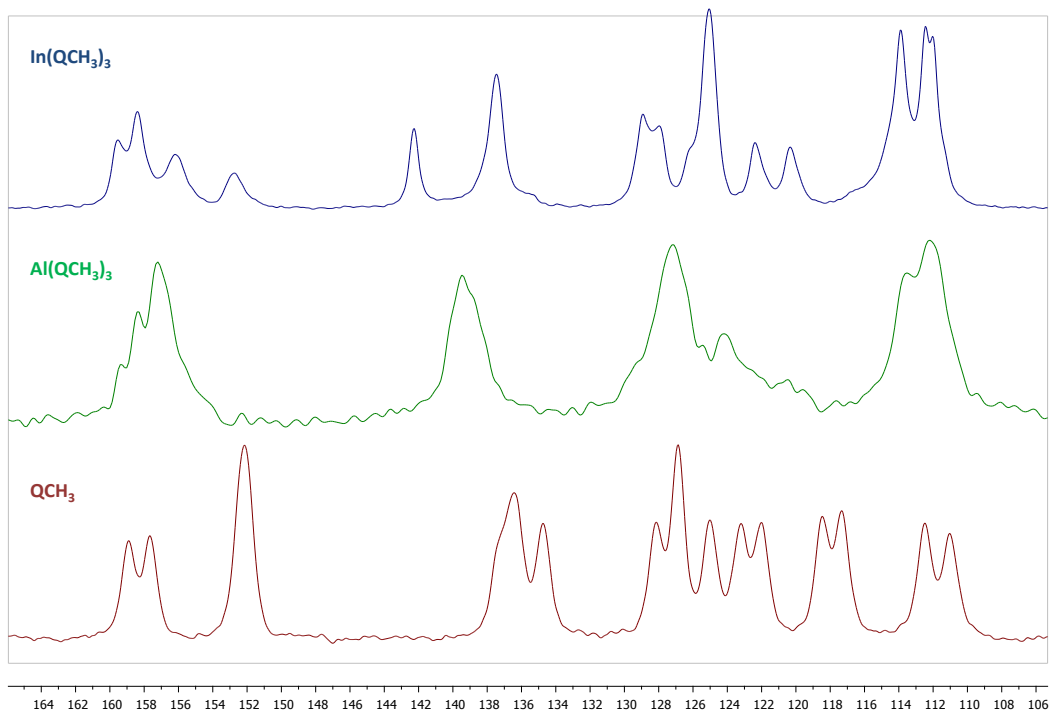

**Figure S33.** Comparison between the  $^{13}\text{C}$  CPMAS NMR spectra of solid  $\text{qCH}_3$  (8-hydroxyquinaldine),  $\text{Al}(\text{qCH}_3)_3$  and  $\text{In}(\text{qCH}_3)_3$ .

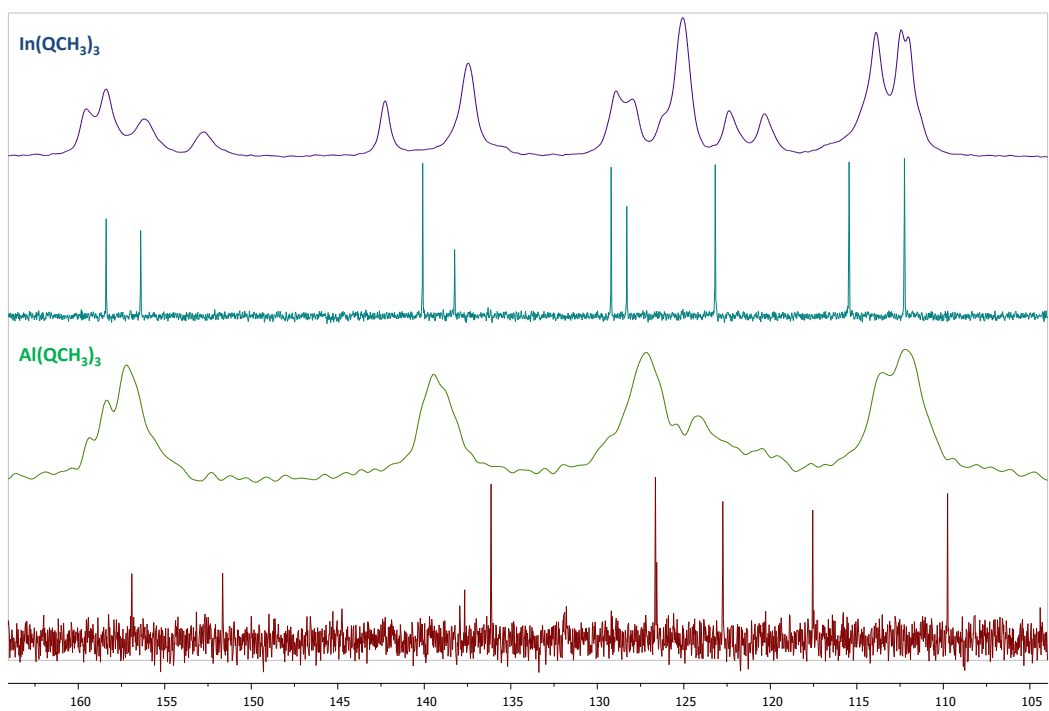

**Figure S34.** Comparison between the solid  $^{13}\text{C}$  CPMAS and solution ( $\text{CDCl}_3$ )  $^{13}\text{C}$  NMR spectra of  $\text{Al}(\text{qCH}_3)_3$  and  $\text{In}(\text{qCH}_3)_3$ .



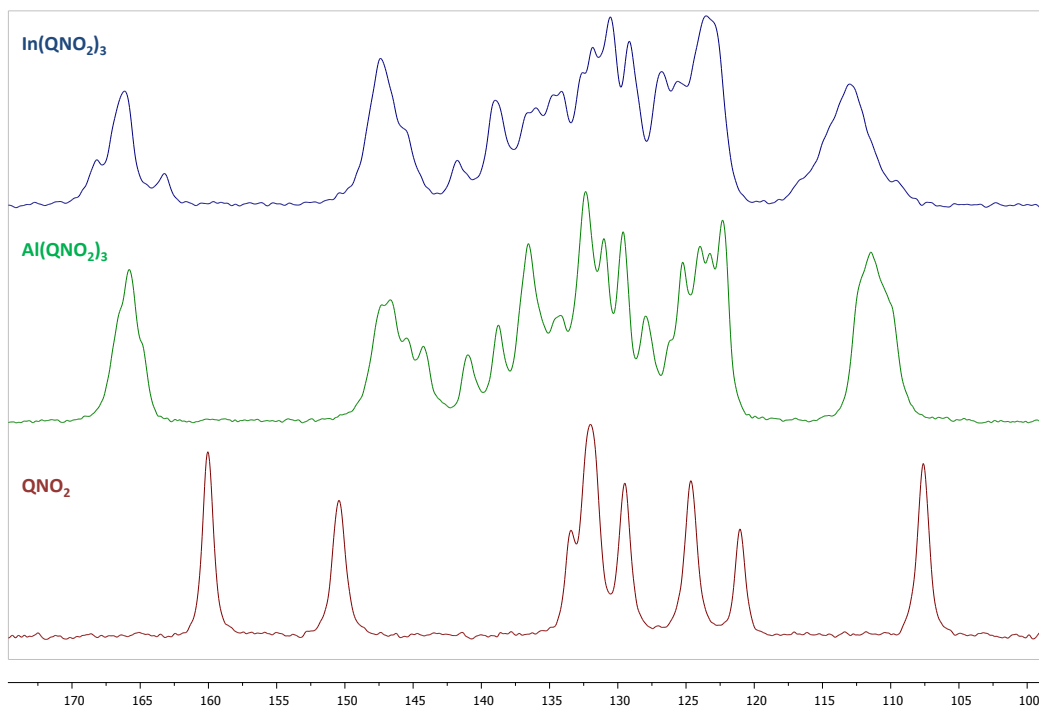

**Figure S35.** Comparison between the  $^{13}\text{C}$  CPMAS NMR spectra of solid  $\text{qNO}_2$  (5-nitro-8-hydroxyquinoline),  $\text{Al}(\text{qNO}_2)_3$  and  $\text{In}(\text{qNO}_2)_3$ .

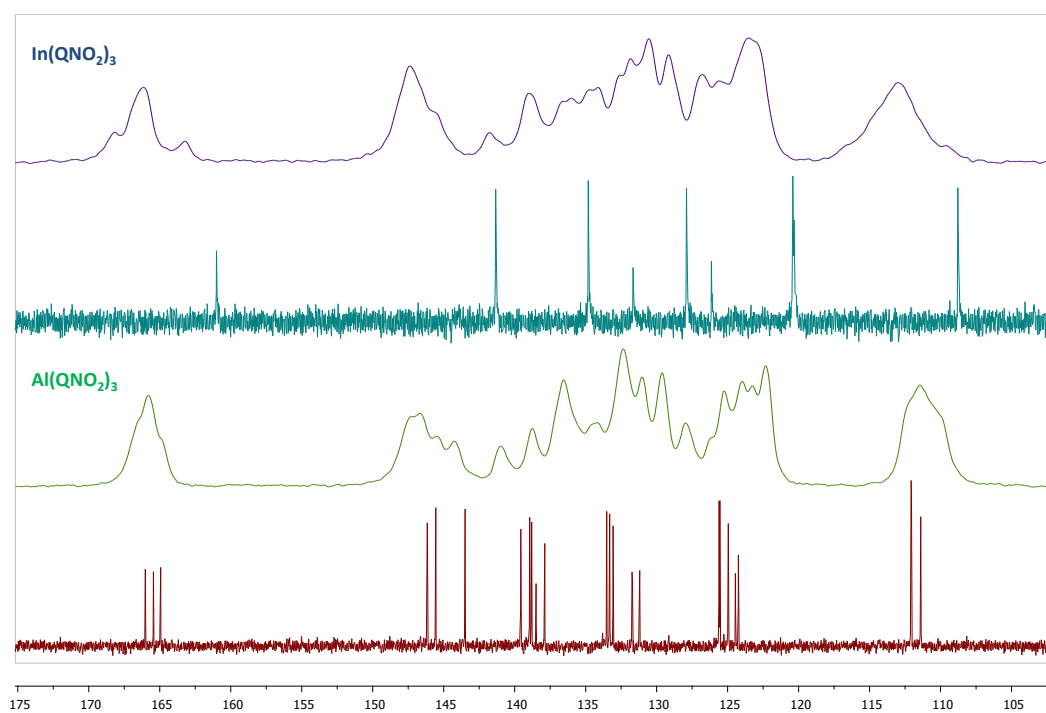

**Figure S36.** Comparison between the solid  $^{13}\text{C}$  CPMAS and solution ( $\text{CDCl}_3$ )  $^{13}\text{C}$  NMR spectra of  $\text{Al}(\text{qNO}_2)_3$  and  $\text{In}(\text{qNO}_2)_3$ .

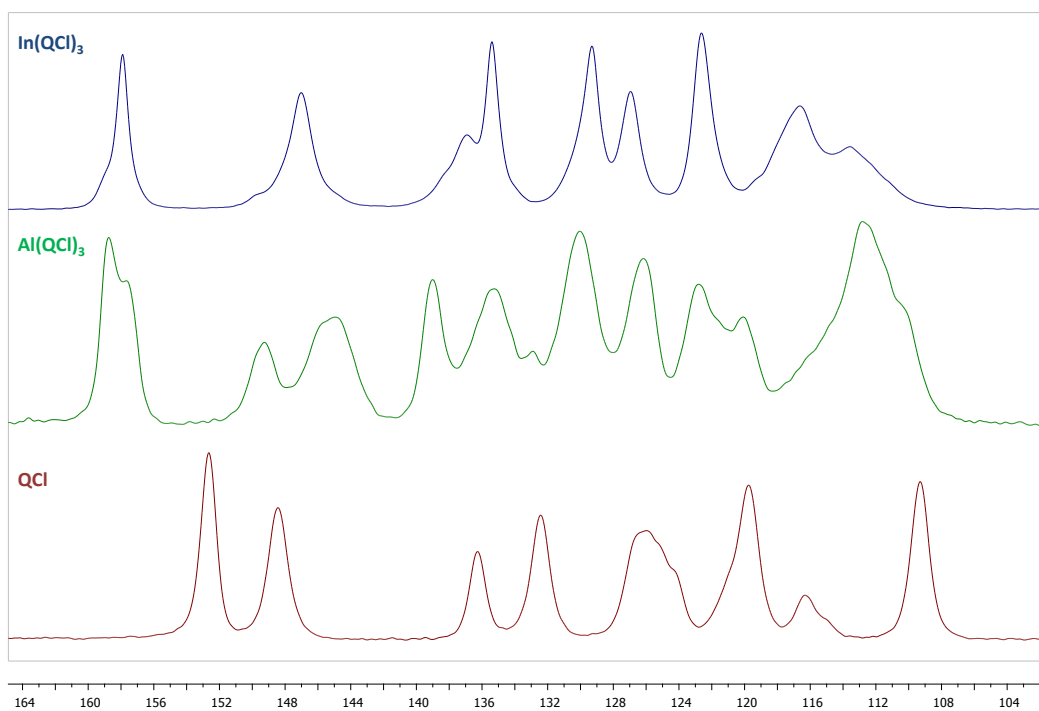

**Figure S37.** Comparison between the  $^{13}\text{C}$  CPMAS NMR spectra of solid qCl (5-chloro-8-hydroxyquinoline),  $\text{Al}(\text{qCl})_3$  and  $\text{In}(\text{qCl})_3$ .

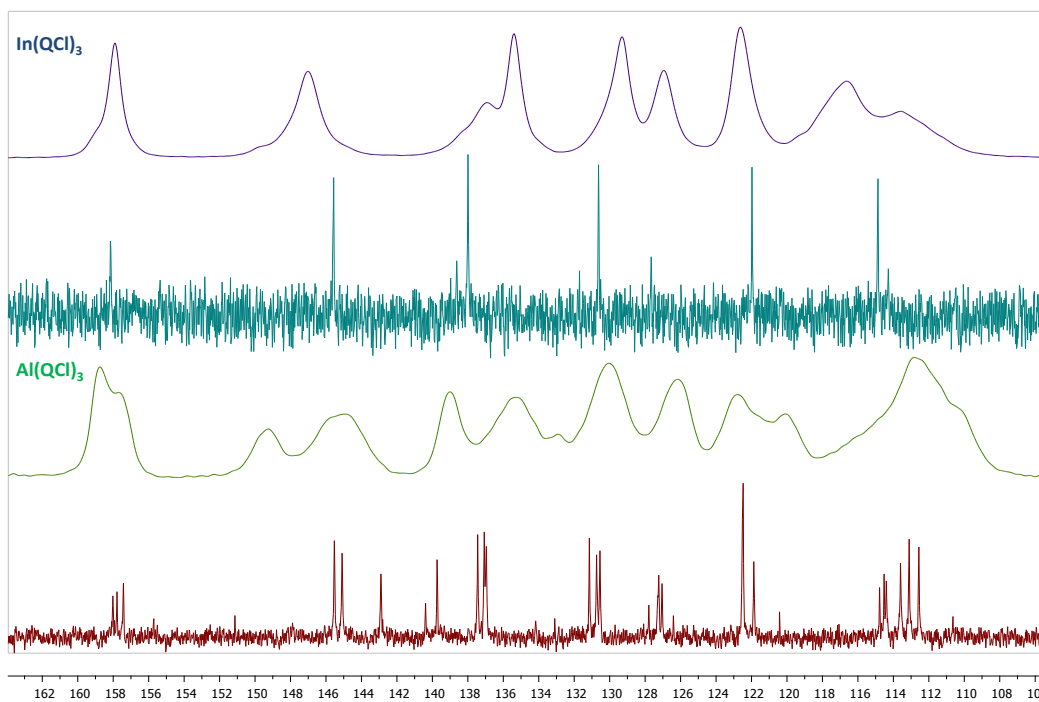

**Figure S38.** Comparison between the solid  $^{13}\text{C}$  CPMAS and solution ( $\text{CDCl}_3$ )  $^{13}\text{C}$  NMR spectra of  $\text{Al}(\text{qCl})_3$  and  $\text{In}(\text{qCl})_3$ .

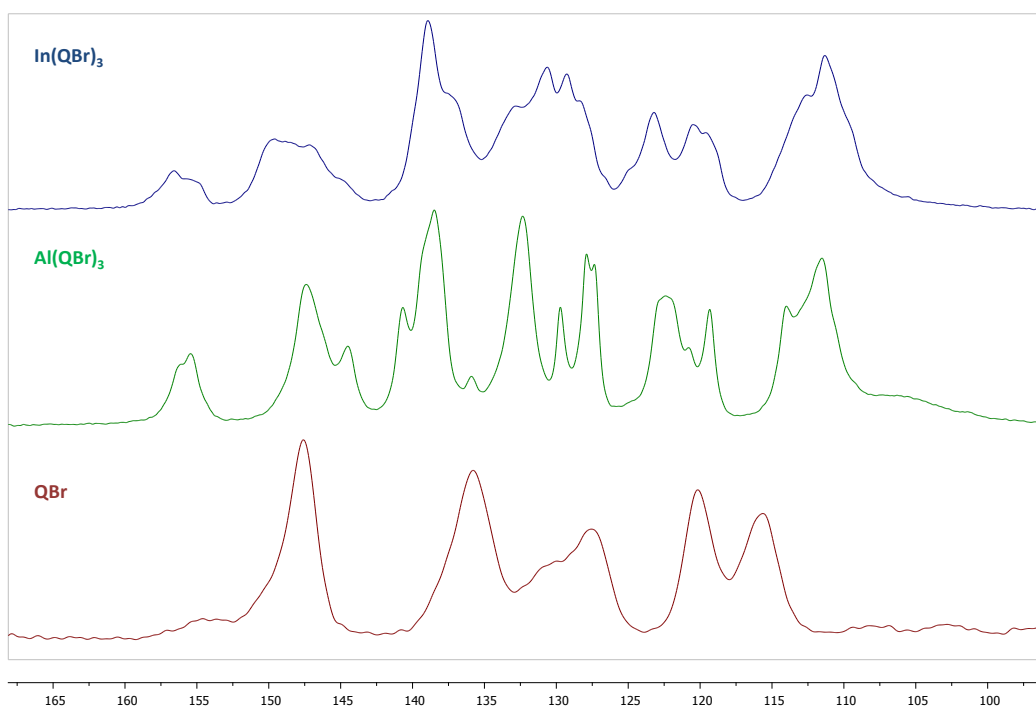

**Figure S39.** Comparison between the  $^{13}\text{C}$  CPMAS NMR spectra of solid qBr (7-bromo-8-hydroxyquinoline),  $\text{Al}(\text{qBr})_3$  and  $\text{In}(\text{qBr})_3$ .

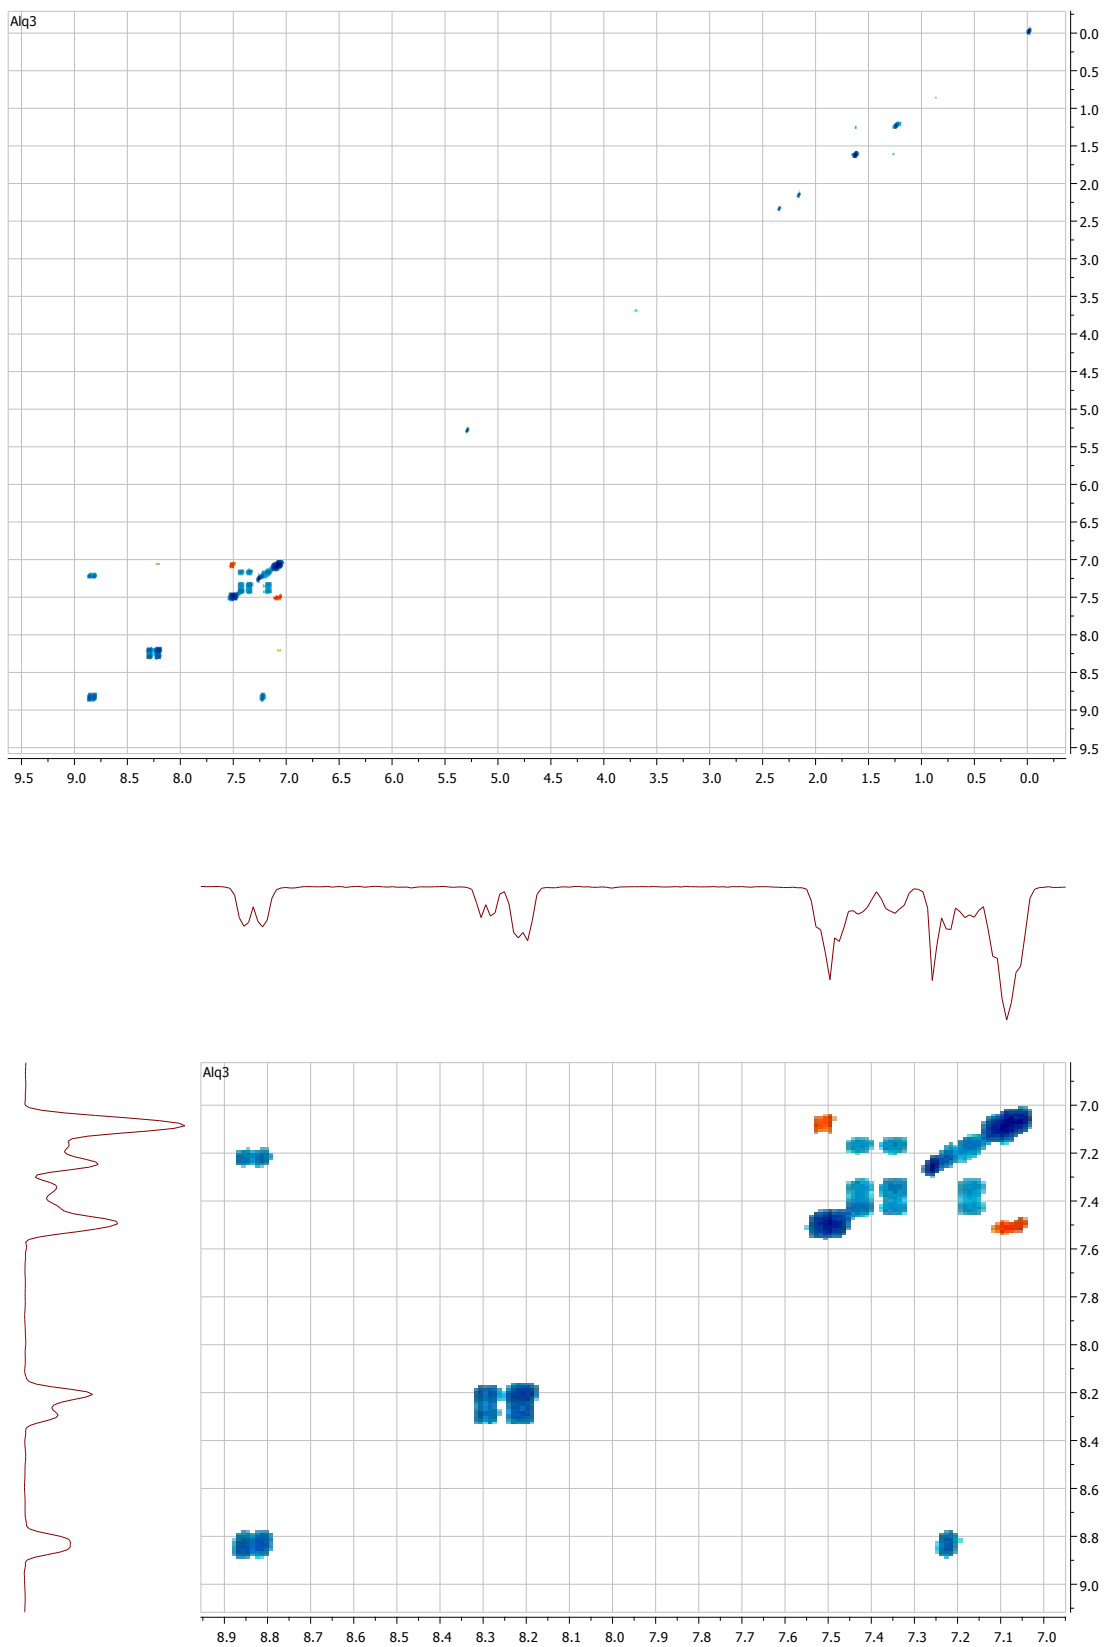

**Figure S40.** 2D <sup>1</sup>H NOESY NMR spectrum of Alq<sub>3</sub> in CDCl<sub>3</sub>.

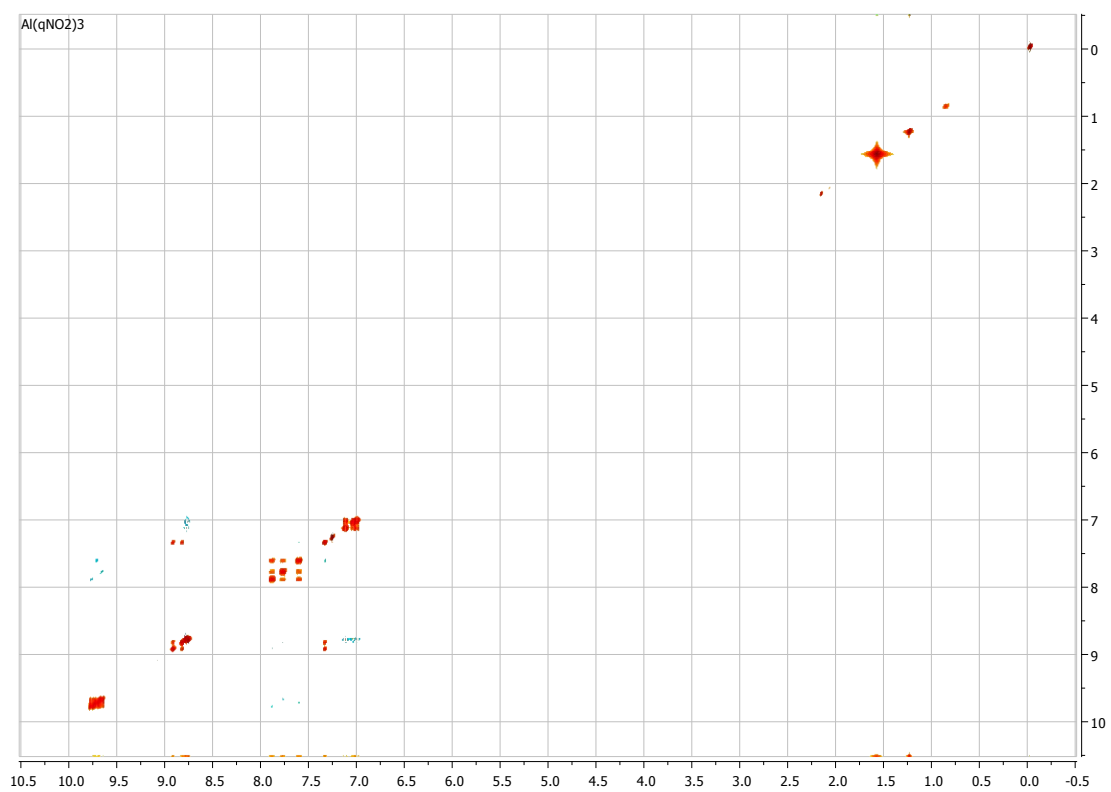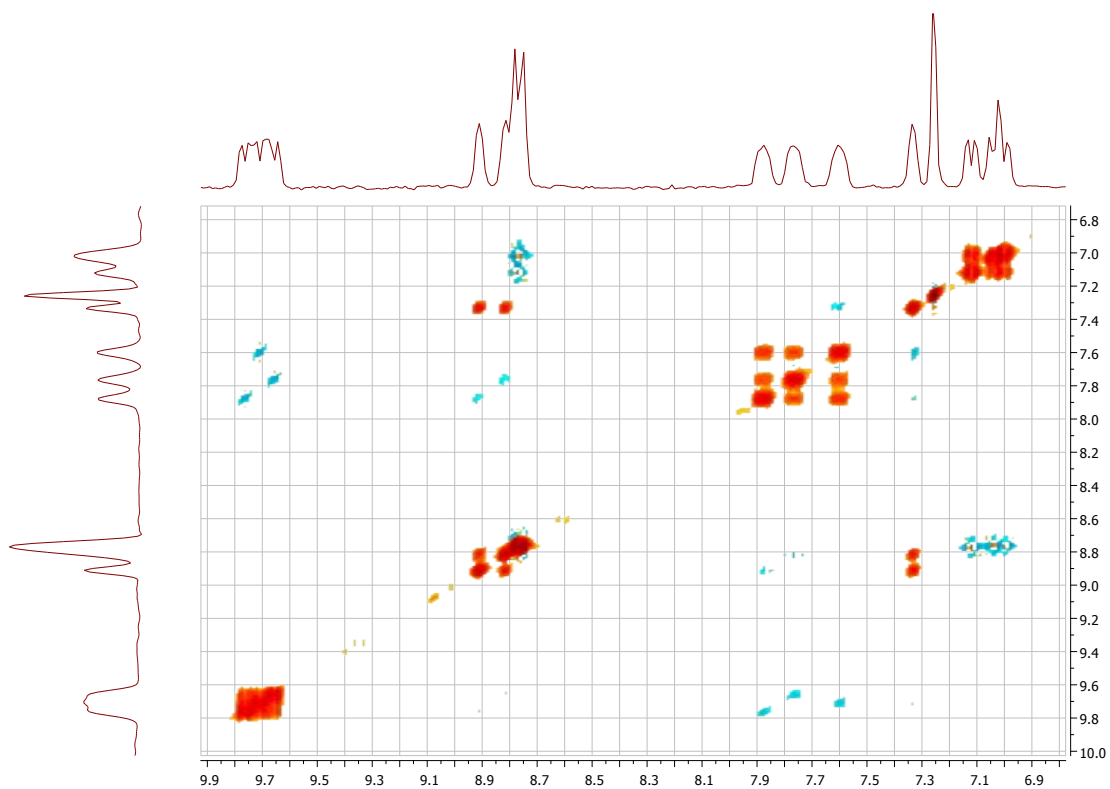

**Figure S41.** 2D  $^1\text{H}$  NOESY NMR spectrum of  $\text{Al}(\text{qNO}_2)_3$  in  $\text{CDCl}_3$ .

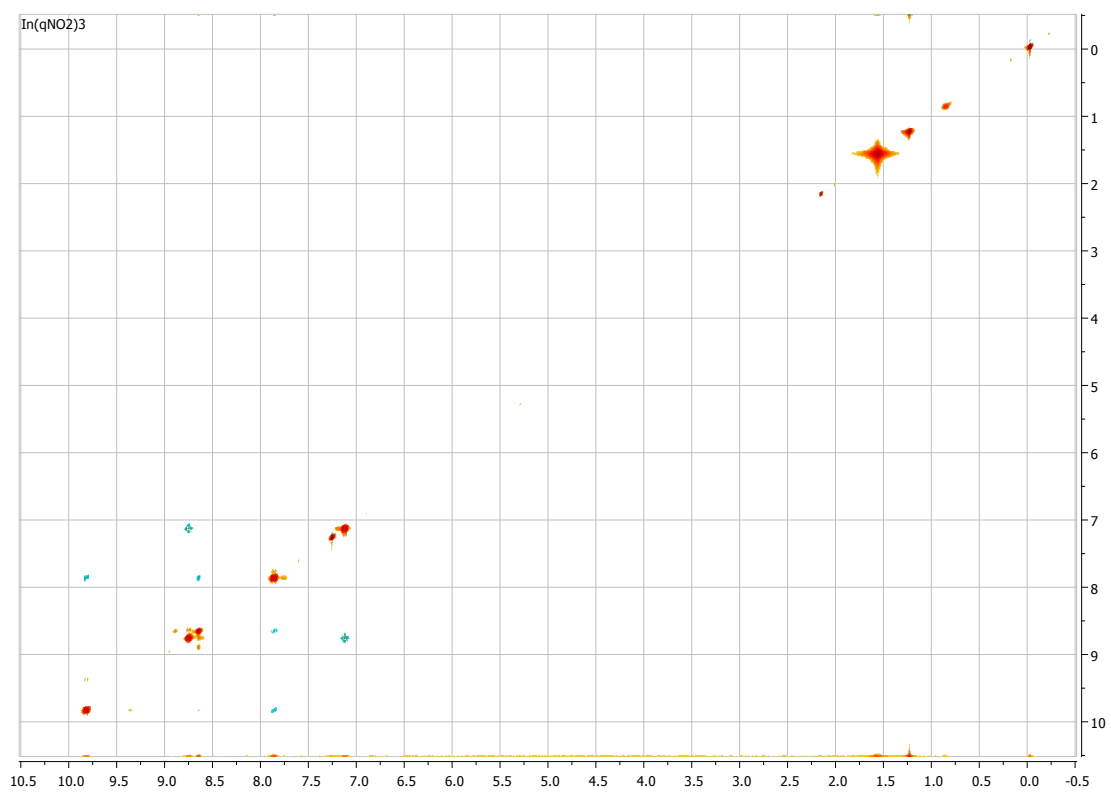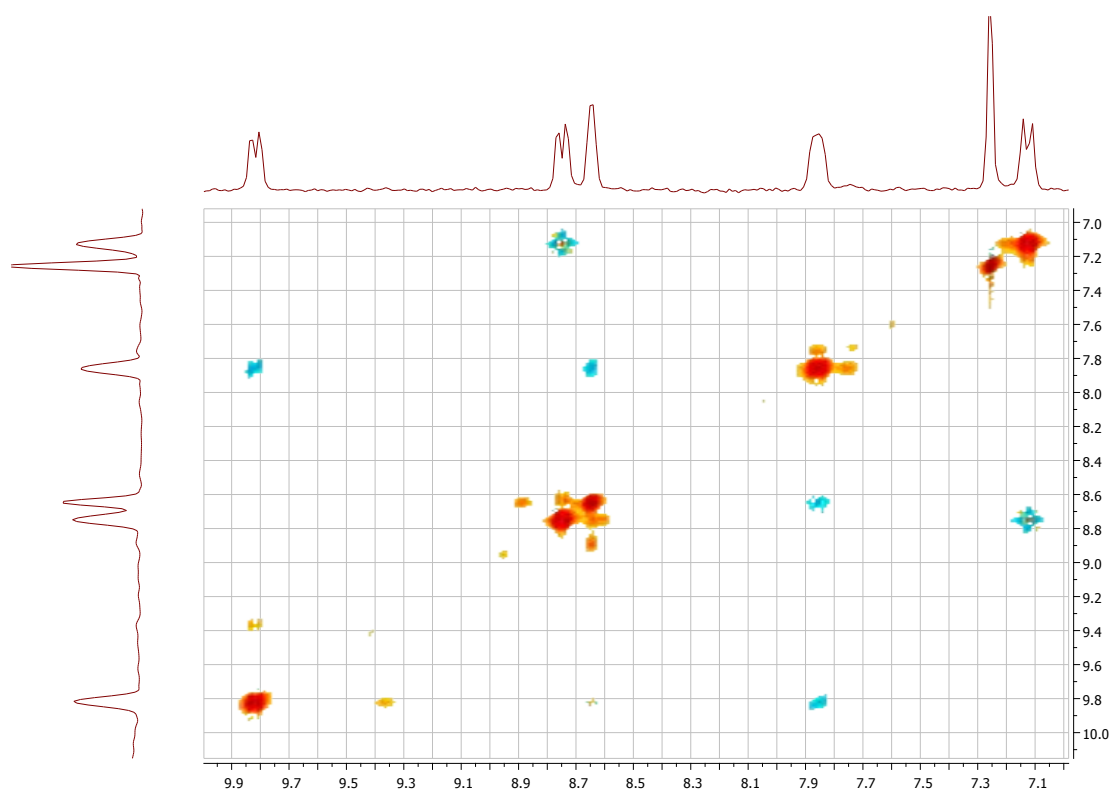

**Figure S42.** 2D <sup>1</sup>H NOESY NMR spectrum of  $\text{In}(\text{qNO}_2)_3$  in  $\text{CDCl}_3$ .

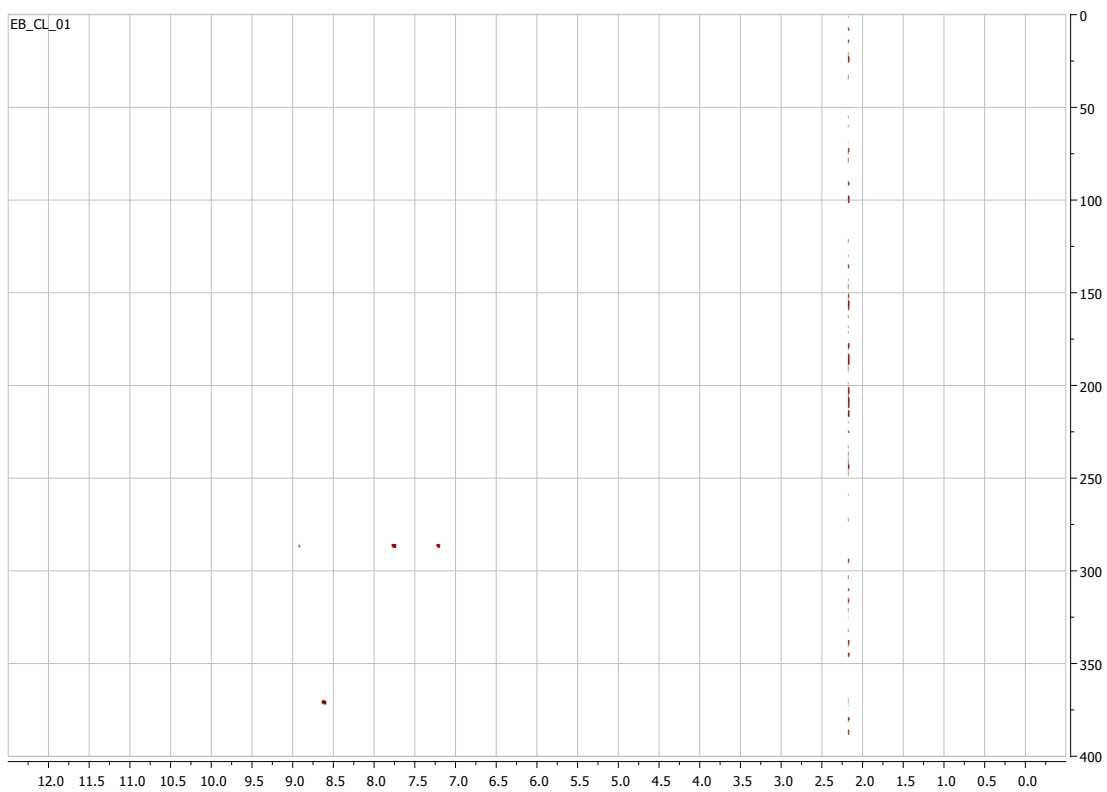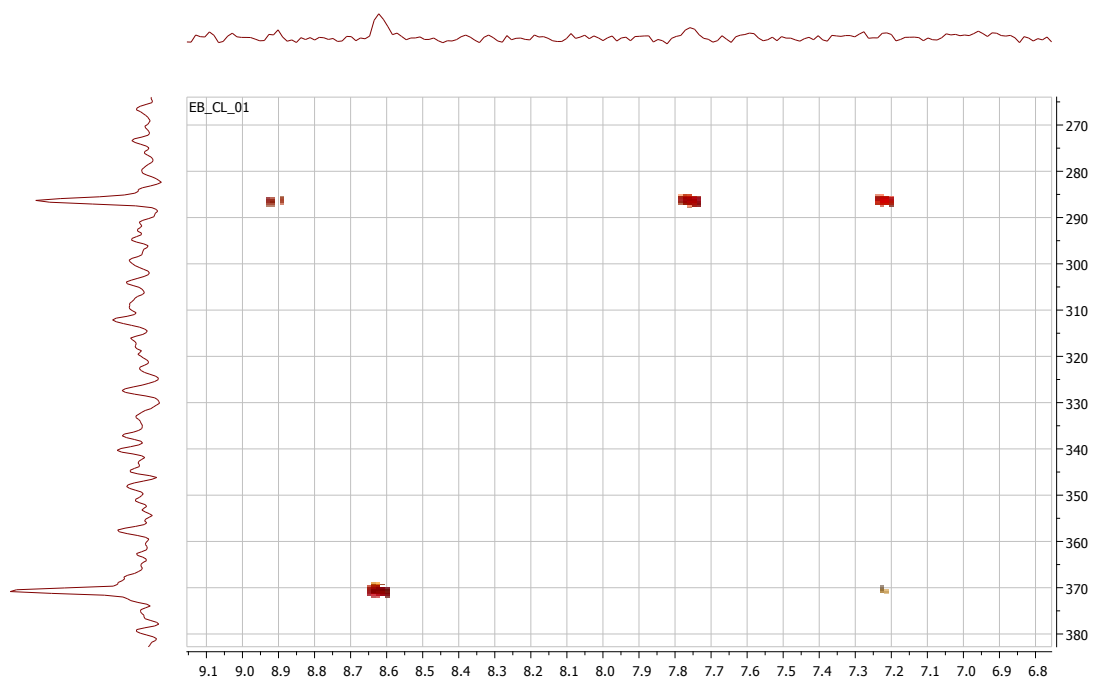

**Figure S43.** 2D  $^{15}\text{N}$  HMBC NMR spectrum of 8-HqNO<sub>2</sub> in CDCl<sub>3</sub>.

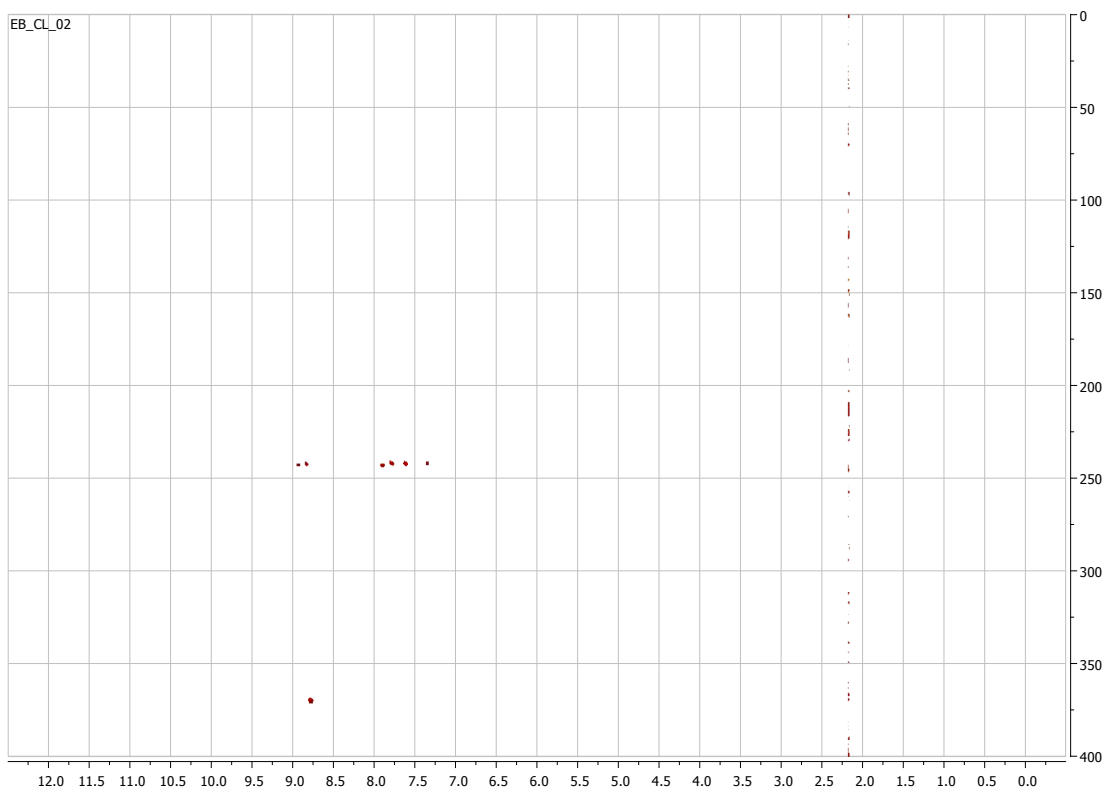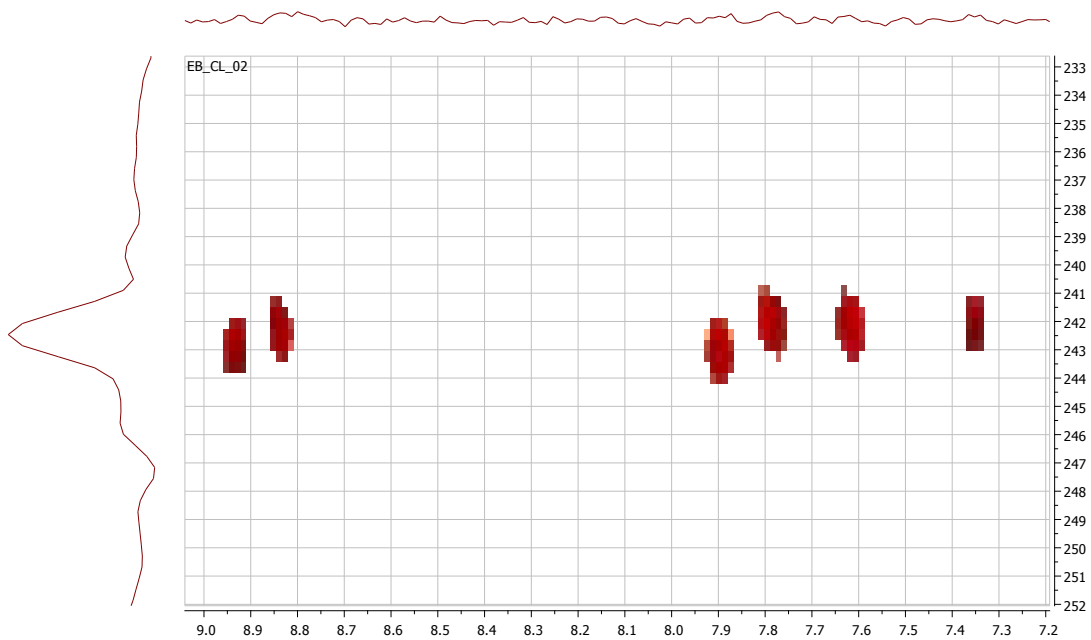

**Figure S44.** 2D  $^{15}\text{N}$  HMBC NMR spectrum of  $\text{Al}(\text{qNO}_2)_3$  in  $\text{CDCl}_3$ .



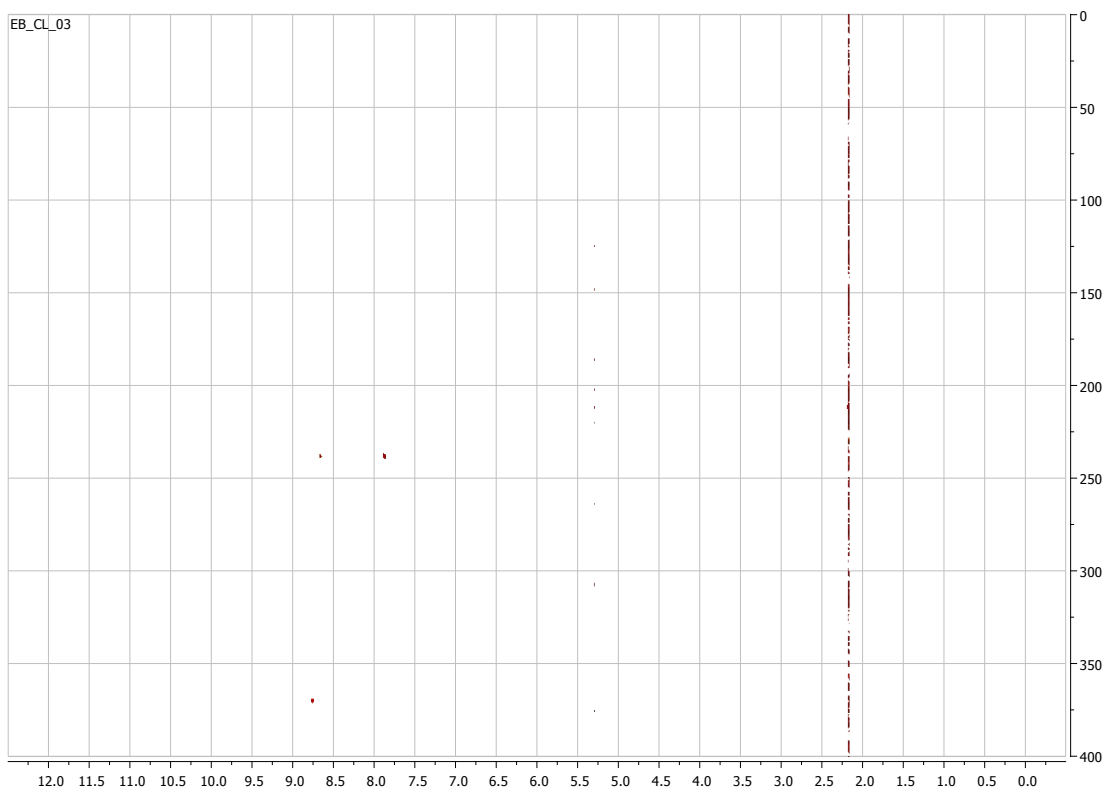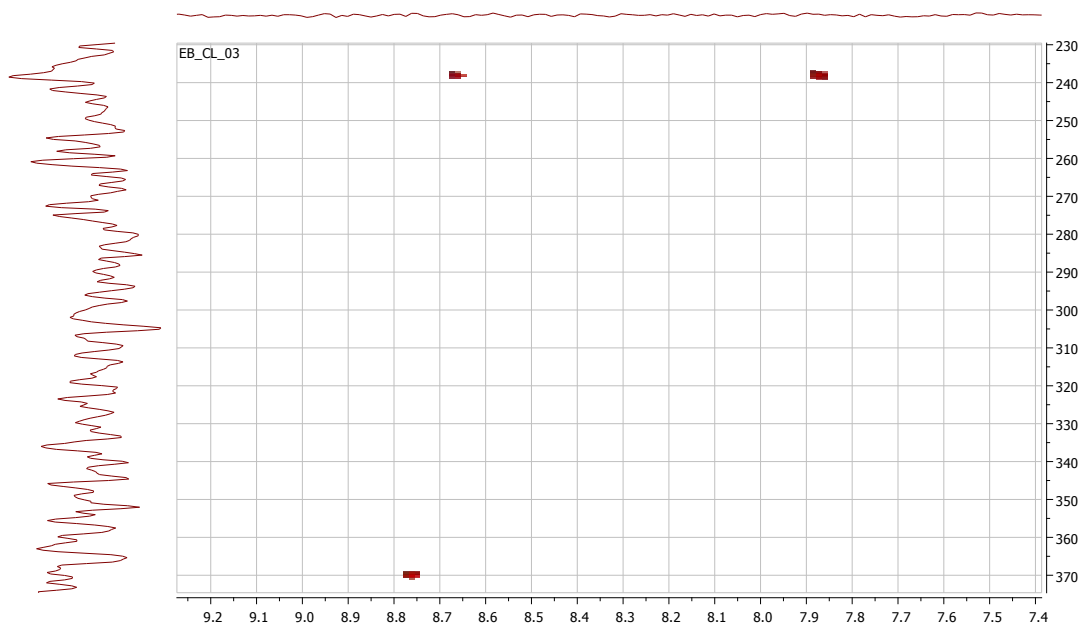

**Figure S45.** 2D  $^{15}\text{N}$  HMBC NMR spectrum of  $\text{In}(\text{qNO}_2)_3$  in  $\text{CDCl}_3$ .

## Section S2. Mass spectrometry analysis

**Table S4.** Electrospray ionization mass spectra data (ESI-MS) of the tris(8-hydroxyquinolate)metallic complexes.

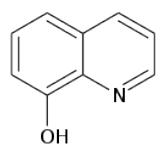

= qH

M-metal

|              | M(III) | $[Mq_3+H]^+$ | $[Mq_3+Na]^+$ | $[Mq_2]^+$                | $[Mq_2+18]^+$ | $[(Mq_3)_2+Na]^+$ | $[q_2M-Mq_3]^+$ |
|--------------|--------|--------------|---------------|---------------------------|---------------|-------------------|-----------------|
| $Mq_3$       | Al     | 460<br>15%   | 482<br>21%    | 315<br>100%               | 333<br>21%    | 941<br>2.8%       | 774<br>21%      |
|              | Ga     | 502<br>0.18% | 524<br>13%    | 357<br>100%               | -             | 1025<br>4.4%      | 858<br>6%       |
|              | In     | 548<br>46%   | 570<br>34%    | 403<br>100%               | 421<br>4.8%   | 1117<br>17%       | 950<br>54%      |
| $M(qCH_3)_3$ | Al     | 502<br>16%   | 524<br>2.9%   | 343<br>100%               | -             | -                 | -               |
|              | In     | 590<br>1.9%  | 612<br>3.9%   | 431<br>100%               | 449<br>0.5%   | -                 | 1020<br>3.0%    |
| $M(qNO_2)_3$ | Al     | 595<br>15%   | 617<br>16%    | 405<br>100%               | 423<br>43%    | 1211<br>2.4%      | 999<br>11%      |
|              | In     | 683<br>12%   | 705<br>46%    | 493<br>100%               | 511<br>28%    | 1387<br>11%       | 1175<br>26%     |
| $M(qCl)_3$   | Al     | 562<br>12%   | 584<br>4.0%   | 383<br>100%               | 401<br>18%    | 1147<br>3,5%      | 944<br>10%      |
|              | In     | 650<br>34%   | 672<br>8,6%   | 471<br>100%               | 489<br>7%     | 1321<br>1,7%      | 1120<br>31%     |
| $M(qBr)_3$   | Al     | 694<br>4,1%  | 716<br>2,8%   | 471<br>53% <sup>(1)</sup> | -             | -                 | -               |
|              | In     | 782<br>100%  | 804<br>25%    | 559<br>54%                | 577<br>4.6%   | -                 | -               |

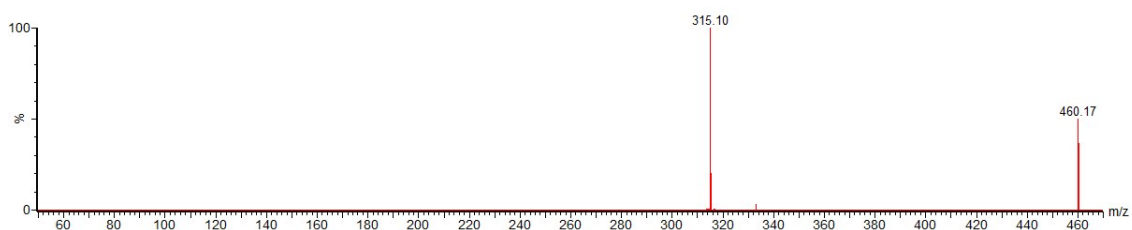

**Figure S46.** Electrospray ionization tandem mass spectra (ESI-MS-MS) of ion  $[\text{Alq}_3+\text{H}]^+$  at 14 eV collision energy.

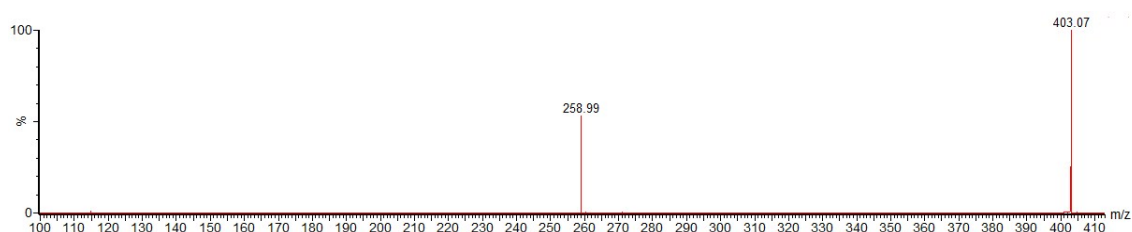

**Figure S47.** Electrospray ionization tandem mass spectra (ESI-MS-MS) of ion  $[\text{Inq}_2]^+$  at 20 eV collision energy.

## Section S3. Quantum chemistry calculations

### S3.1. Calculated energies for the systems studied

**Table S5.** Electronic energies,  $E_{el}$  and unscaled enthalpies at  $T = 298.15$  K,  $H_{298K}$ , obtained at the M06-2X/6-31+G(d,p)/SDD level of theory for the systems studied (the SDD Effective Core Potential basis set was used for the heavy atoms of Ga, In and Br, and 6-31+G(d,p) was used for the other atoms). All optimized geometries were obtained at the same level of theory.

| Molecular system                               | $E_{el}$ / hartree | $H_{298K}$ / hartree |
|------------------------------------------------|--------------------|----------------------|
| Hq                                             | -476.986421        | ---                  |
| HqCH <sub>3</sub>                              | -516.289171        | ---                  |
| HqNO <sub>2</sub>                              | -681.417832        | ---                  |
| HqCl                                           | -936.554034        | ---                  |
| HqBr                                           | -489.708928        | ---                  |
| <i>mer</i> -Alq <sub>3</sub>                   | -1671.807273       | -1671.384047         |
| <i>mer</i> -Al(qCH <sub>3</sub> ) <sub>3</sub> | -1789.705794       | ---                  |
| <i>mer</i> -Al(qNO <sub>2</sub> ) <sub>3</sub> | -2285.107782       | -2284.667180         |
| <i>mer</i> -Al(qCl) <sub>3</sub>               | -3050.502918       | ---                  |
| <i>mer</i> -Al(qBr) <sub>3</sub>               | -1709.995357       | ---                  |
| <i>fac</i> -Alq <sub>3</sub>                   | -1671.799618       | -1671.376926         |
| <i>fac</i> -Al(qCH <sub>3</sub> ) <sub>3</sub> | -1789.689161       | ---                  |
| <i>fac</i> -Al(qNO <sub>2</sub> ) <sub>3</sub> | -2285.100015       | ---                  |
| <i>fac</i> -Al(qCl) <sub>3</sub>               | -3050.494798       | ---                  |
| <i>fac</i> -Al(qBr) <sub>3</sub>               | -1709.983875       | ---                  |
| <i>mer</i> -Gaq <sub>3</sub>                   | -1431.390124       | -1430.968326         |
| <i>fac</i> -Gaq <sub>3</sub>                   | -1431.383849       | -1430.963356         |
| <i>mer</i> -Inq <sub>3</sub>                   | -1431.223614       | -1430.802554         |
| <i>mer</i> -In(qCH <sub>3</sub> ) <sub>3</sub> | -1549.126855       | ---                  |
| <i>mer</i> -In(qNO <sub>2</sub> ) <sub>3</sub> | -2044.522217       | ---                  |
| <i>mer</i> -In(qCl) <sub>3</sub>               | -2809.918581       | ---                  |

|                                                 |              |              |
|-------------------------------------------------|--------------|--------------|
| <i>mer</i> -In(qBr) <sub>3</sub>                | -1469.411455 | ---          |
| <i>fac</i> -Inq <sub>3</sub>                    | -1431.218609 | -1430.797823 |
| <i>fac</i> -In(qCH <sub>3</sub> ) <sub>3</sub>  | -1549.115266 | ---          |
| <i>fac</i> -In(qNO <sub>2</sub> ) <sub>3</sub>  | -2044.516749 | -2044.078392 |
| <i>fac</i> -In(qCl) <sub>3</sub>                | -2809.913314 | ---          |
| <i>fac</i> -In(qBr) <sub>3</sub>                | -1469.402793 | ---          |
| q <sup>-</sup>                                  | -476.417758  | -476.282361  |
| qCH <sub>3</sub> <sup>-</sup>                   | -515.718076  | ---          |
| qNO <sub>2</sub> <sup>-</sup>                   | -680.886035  | -680.744252  |
| qCl <sup>-</sup>                                | -935.9948074 | ---          |
| qBr <sup>-</sup>                                | -489.153474  | ---          |
| Alq <sub>2</sub> <sup>+</sup>                   | -1195.135331 | -1194.852010 |
| Al(qCH <sub>3</sub> ) <sub>2</sub> <sup>+</sup> | -1273.750443 | ---          |
| Al(qNO <sub>2</sub> ) <sub>2</sub> <sup>+</sup> | -1603.970346 | -1603.675716 |
| Al(qCl) <sub>2</sub> <sup>+</sup>               | -2114.255895 | ---          |
| Al(qBr) <sub>2</sub> <sup>+</sup>               | -1220.582758 | ---          |
| Gaq <sub>2</sub> <sup>+</sup>                   | -954.733702  | ---          |
| Inq <sub>2</sub> <sup>+</sup>                   | -954.550314  | -954.268551  |
| In(qCH <sub>3</sub> ) <sub>2</sub> <sup>+</sup> | -1033.164014 | ---          |
| In(qNO <sub>2</sub> ) <sub>2</sub> <sup>+</sup> | -1363.385476 | -1363.092466 |
| In(qCl) <sub>2</sub> <sup>+</sup>               | -1873.671062 | ---          |
| In(qBr) <sub>2</sub> <sup>+</sup>               | -979.998549  | ---          |

---

**Table S6.** Electronic energies,  $E_{\text{el}}$ , obtained at the M06-2X/6-31+G(d,p) level of theory for the systems studied.

| Isolated ligands <sup>[a]</sup>                           | $E_{\text{el}}$ / Hartree | $\Delta E_{\text{el}}(\text{dist.})$ / kJ·mol <sup>-1</sup>               |                                            |
|-----------------------------------------------------------|---------------------------|---------------------------------------------------------------------------|--------------------------------------------|
| q• optimized                                              | -476.330029               |                                                                           |                                            |
| q• 1 ( <i>mer</i> -Alq <sub>3</sub> )                     | -476.318124               | 31                                                                        |                                            |
| q• 2 ( <i>mer</i> -Alq <sub>3</sub> )                     | -476.316707               | 35                                                                        |                                            |
| q• 3 ( <i>mer</i> -Alq <sub>3</sub> )                     | -476.316584               | 35                                                                        |                                            |
| q• ( <i>fac</i> -Alq <sub>3</sub> )                       | -476.318532               | 30                                                                        |                                            |
| q• 1 ( <i>mer</i> -Inq <sub>3</sub> )                     | -476.320430               | 25                                                                        |                                            |
| q• 2 ( <i>mer</i> -Inq <sub>3</sub> )                     | -476.319726               | 27                                                                        |                                            |
| q• 3 ( <i>mer</i> -Inq <sub>3</sub> )                     | -476.319729               | 27                                                                        |                                            |
| q• ( <i>fac</i> -Inq <sub>3</sub> )                       | -476.320769               | 24                                                                        |                                            |
| Intermolecular complexes without the metal <sup>[b]</sup> |                           | $\Delta E_{\text{el}}(\text{int.})$ <sup>[c]</sup> / kJ·mol <sup>-1</sup> |                                            |
|                                                           |                           | (with $\Delta E_{\text{el}}(\text{dist.})$ )                              | (no $\Delta E_{\text{el}}(\text{dist.})$ ) |
| [q• <sub>3</sub> ] ( <i>mer</i> -Alq <sub>3</sub> )       | -1428.878542              | 293                                                                       | 191                                        |
| [q• <sub>3</sub> ] ( <i>fac</i> -Alq <sub>3</sub> )       | -1428.874311              | 304                                                                       | 213                                        |
| [q• <sub>3</sub> ] ( <i>mer</i> -Inq <sub>3</sub> )       | -1428.945314              | 118                                                                       | 38                                         |
| [q• <sub>3</sub> ] ( <i>fac</i> -Inq <sub>3</sub> )       | -1428.946170              | 115                                                                       | 42                                         |

<sup>[a]</sup> The values of  $E_{\text{el}}$  presented are for the radical ligands with various geometries; for the fully optimized isolated 8-hydroxyquinoline ligand (q• optimized) and for the isolated ligands with the geometry they adopt in the respective metallic complexes (obtained from a single-point energy calculation) – in the *mer*-isomers the three ligands have slightly different structures, whereas in the *fac*-isomer they are all equivalent due to symmetry;  $\Delta E_{\text{el}}(\text{dist.})$  is the geometry distortion energy of each ligand relative to its optimized structure (q• optimized) – it translates the energy required for the structural rearrangement of the isolated ligand upon complexation with the metal.

<sup>[b]</sup> The intermolecular complexes formed between three 8-hydroxyquinoline radicals considering the geometry they adopt in the respective Mq<sub>3</sub> complexes ( $E_{\text{el}}$  obtained from a single-point energy calculation).

<sup>[c]</sup> The values of  $\Delta E_{\text{el}}(\text{int.})$  refer to the total interaction energy (not corrected for BSSE) between the three 8-hydroxyquinoline radicals in the intermolecular complexes, as translated by the equation:  $3\text{q}\bullet \rightarrow [\text{q}\bullet_3]$ , both considering and not considering the contribution of the geometry distortion energy on complexation,  $\Delta E_{\text{el}}(\text{dist.})$ .

**Table S7.** Calculated HOMO and LUMO orbital energies, at the M06-2X/6-31+G(d,p)/SDD level of theory, for the Al(III) and In(III) complexes studied.

| Molecular system                               | $E_{\text{HOMO}}$ / Hartree | $E_{\text{LUMO}}$ / Hartree | $\Delta_{(\text{LUMO}-\text{HOMO})}$ / hartree |
|------------------------------------------------|-----------------------------|-----------------------------|------------------------------------------------|
| <i>mer</i> -Alq <sub>3</sub>                   | -0.24012                    | -0.04459                    | <b>0.196</b>                                   |
| <i>mer</i> -Al(qCH <sub>3</sub> ) <sub>3</sub> | -0.23294                    | -0.04044                    | <b>0.193</b>                                   |
| <i>mer</i> -Al(qNO <sub>2</sub> ) <sub>3</sub> | -0.28658                    | -0.09075                    | <b>0.196</b>                                   |
| <i>mer</i> -Al(qCl) <sub>3</sub>               | -0.24909                    | -0.05906                    | <b>0.190</b>                                   |
| <i>mer</i> -Al(qBr) <sub>3</sub>               | -0.25023                    | -0.05626                    | <b>0.194</b>                                   |
| <i>fac</i> -Alq <sub>3</sub>                   | -0.24735                    | -0.04228                    | <b>0.205</b>                                   |
| <i>fac</i> -Al(qCH <sub>3</sub> ) <sub>3</sub> | -0.24003                    | -0.04028                    | <b>0.200</b>                                   |
| <i>fac</i> -Al(qNO <sub>2</sub> ) <sub>3</sub> | -0.29038                    | -0.08336                    | <b>0.207</b>                                   |
| <i>fac</i> -Al(qCl) <sub>3</sub>               | -0.25633                    | -0.05700                    | <b>0.199</b>                                   |
| <i>fac</i> -Al(qBr) <sub>3</sub>               | -0.25623                    | -0.05447                    | <b>0.202</b>                                   |
| <i>mer</i> -Inq <sub>3</sub>                   | -0.24247                    | -0.0425                     | <b>0.200</b>                                   |
| <i>mer</i> -In(qCH <sub>3</sub> ) <sub>3</sub> | -0.23316                    | -0.03965                    | <b>0.194</b>                                   |
| <i>mer</i> -In(qNO <sub>2</sub> ) <sub>3</sub> | -0.28772                    | -0.08839                    | <b>0.199</b>                                   |
| <i>mer</i> -In(qCl) <sub>3</sub>               | -0.25120                    | -0.05682                    | <b>0.194</b>                                   |
| <i>mer</i> -In(qBr) <sub>3</sub>               | -0.25250                    | -0.05384                    | <b>0.199</b>                                   |
| <i>fac</i> -Inq <sub>3</sub>                   | -0.24755                    | -0.0428                     | <b>0.205</b>                                   |
| <i>fac</i> -In(qCH <sub>3</sub> ) <sub>3</sub> | -0.24050                    | -0.04189                    | <b>0.199</b>                                   |
| <i>fac</i> -In(qNO <sub>2</sub> ) <sub>3</sub> | -0.29225                    | -0.08760                    | <b>0.205</b>                                   |
| <i>fac</i> -In(qCl) <sub>3</sub>               | -0.25609                    | -0.05710                    | <b>0.199</b>                                   |
| <i>fac</i> -In(qBr) <sub>3</sub>               | -0.25619                    | -0.05453                    | <b>0.202</b>                                   |

### S3.2. Optimized geometries

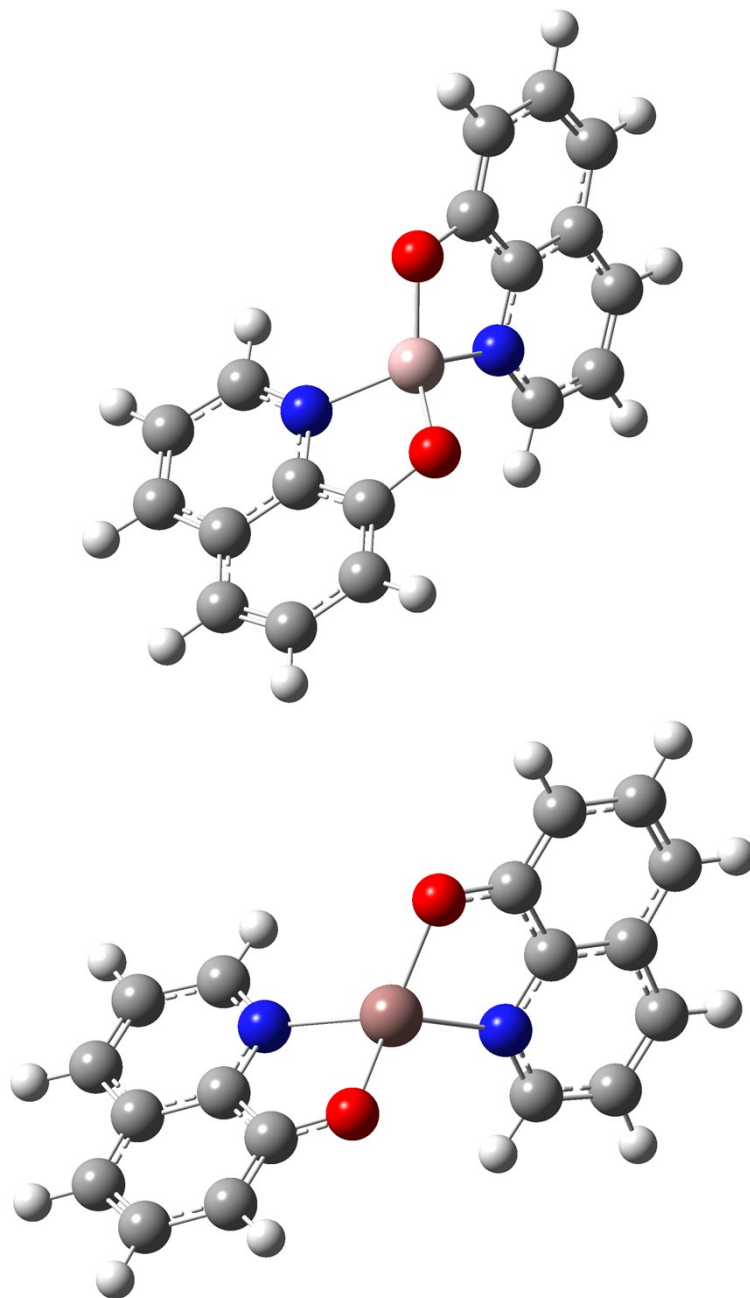

**Figure S48.** Optimized geometries for the  $\text{Alq}_2^+$  (top) and  $\text{Inq}_2^+$  (bottom) complexes, obtained at the M06-2X/6-31+G(d,p)/SDD level of theory.



**Table S8.** Optimized geometries in Cartesian coordinates for the molecular systems considered, obtained at the M06-2X/6-31+G(d,p)/SDD level of theory.

**A) *mer-Alq<sub>3</sub>***

|    |    |   |           |           |           |
|----|----|---|-----------|-----------|-----------|
| 1  | 7  | 0 | -0.622502 | 1.381701  | 0.774673  |
| 2  | 7  | 0 | -1.690989 | -0.851385 | -0.906397 |
| 3  | 7  | 0 | 2.021787  | 0.071592  | 0.534104  |
| 4  | 8  | 0 | 1.012201  | -1.631683 | -1.176158 |
| 5  | 8  | 0 | 0.309827  | 1.002799  | -1.609449 |
| 6  | 8  | 0 | -0.345740 | -1.297033 | 1.275799  |
| 7  | 6  | 0 | -2.294113 | -0.577173 | -2.045325 |
| 8  | 6  | 0 | -3.561705 | -1.120401 | -2.350208 |
| 9  | 6  | 0 | -4.177096 | -1.953340 | -1.443753 |
| 10 | 6  | 0 | -3.542992 | -2.266493 | -0.214604 |
| 11 | 6  | 0 | -2.278398 | -1.676103 | -0.001179 |
| 12 | 6  | 0 | -4.070847 | -3.110838 | 0.794201  |
| 13 | 6  | 0 | -3.330783 | -3.323673 | 1.938034  |
| 14 | 6  | 0 | -2.062580 | -2.734904 | 2.150456  |
| 15 | 6  | 0 | -1.505087 | -1.903962 | 1.188488  |
| 16 | 6  | 0 | -1.098013 | 1.477661  | 2.001623  |
| 17 | 6  | 0 | -1.573942 | 2.707251  | 2.510053  |
| 18 | 6  | 0 | -1.541727 | 3.829405  | 1.713057  |
| 19 | 6  | 0 | -1.038704 | 3.750526  | 0.389614  |
| 20 | 6  | 0 | -0.589839 | 2.476699  | -0.026852 |
| 21 | 6  | 0 | -0.956971 | 4.825070  | -0.530087 |
| 22 | 6  | 0 | -0.446318 | 4.584573  | -1.789432 |
| 23 | 6  | 0 | 0.000640  | 3.310600  | -2.207129 |
| 24 | 6  | 0 | -0.059647 | 2.228025  | -1.338810 |
| 25 | 6  | 0 | 2.466149  | 0.967225  | 1.392928  |
| 26 | 6  | 0 | 3.822643  | 1.018566  | 1.778470  |
| 27 | 6  | 0 | 4.708097  | 0.108907  | 1.248914  |
| 28 | 6  | 0 | 4.260014  | -0.865523 | 0.323181  |
| 29 | 6  | 0 | 2.884275  | -0.832793 | -0.004470 |
| 30 | 6  | 0 | 5.078040  | -1.847994 | -0.285681 |
| 31 | 6  | 0 | 4.503731  | -2.733984 | -1.173799 |
| 32 | 6  | 0 | 3.132251  | -2.701556 | -1.506182 |
| 33 | 6  | 0 | 2.291603  | -1.754578 | -0.936264 |
| 34 | 1  | 0 | -1.757197 | 0.080502  | -2.723489 |
| 35 | 1  | 0 | -4.031488 | -0.876131 | -3.295886 |
| 36 | 1  | 0 | -5.152273 | -2.382026 | -1.661243 |
| 37 | 1  | 0 | -5.040458 | -3.577587 | 0.654720  |
| 38 | 1  | 0 | -3.730975 | -3.973320 | 2.711315  |
| 39 | 1  | 0 | -1.504538 | -2.935482 | 3.058674  |
| 40 | 1  | 0 | -1.093195 | 0.562809  | 2.587462  |
| 41 | 1  | 0 | -1.958273 | 2.749741  | 3.522640  |
| 42 | 1  | 0 | -1.903220 | 4.783427  | 2.088458  |
| 43 | 1  | 0 | -1.294497 | 5.813831  | -0.237521 |
| 44 | 1  | 0 | -0.382285 | 5.406637  | -2.496841 |
| 45 | 1  | 0 | 0.398560  | 3.161922  | -3.205049 |
| 46 | 1  | 0 | 1.740061  | 1.668613  | 1.793726  |
| 47 | 1  | 0 | 4.146382  | 1.773292  | 2.485779  |
| 48 | 1  | 0 | 5.757260  | 0.128507  | 1.532886  |
| 49 | 1  | 0 | 6.135880  | -1.891184 | -0.048136 |
| 50 | 1  | 0 | 5.127934  | -3.489901 | -1.642164 |
| 51 | 1  | 0 | 2.714683  | -3.411674 | -2.211227 |
| 52 | 13 | 0 | 0.149781  | -0.283473 | -0.238752 |

**B) *mer-Al(qCH<sub>3</sub>)<sub>3</sub>***

|   |   |   |           |           |           |
|---|---|---|-----------|-----------|-----------|
| 1 | 7 | 0 | 0.182923  | 1.783328  | -0.535910 |
| 2 | 7 | 0 | 1.995078  | -0.217563 | 0.871343  |
| 3 | 7 | 0 | -1.782483 | -0.865730 | -0.755517 |
| 4 | 8 | 0 | -0.115584 | -1.941612 | 1.006436  |
| 5 | 8 | 0 | -0.921847 | 0.522039  | 1.464828  |
| 6 | 8 | 0 | 0.907824  | -0.925784 | -1.406146 |

|    |    |   |           |           |           |
|----|----|---|-----------|-----------|-----------|
| 7  | 6  | 0 | 2.479942  | 0.186853  | 2.034966  |
| 8  | 6  | 0 | 3.840523  | -0.055686 | 2.363093  |
| 9  | 6  | 0 | 4.664076  | -0.713296 | 1.485061  |
| 10 | 6  | 0 | 4.161437  | -1.151922 | 0.235582  |
| 11 | 6  | 0 | 2.801144  | -0.873837 | -0.015058 |
| 12 | 6  | 0 | 4.919212  | -1.826487 | -0.755137 |
| 13 | 6  | 0 | 4.306481  | -2.186842 | -1.934809 |
| 14 | 6  | 0 | 2.944992  | -1.907001 | -2.192397 |
| 15 | 6  | 0 | 2.169229  | -1.257410 | -1.245479 |
| 16 | 6  | 0 | 0.828495  | 2.399952  | -1.519084 |
| 17 | 6  | 0 | 0.589590  | 3.775142  | -1.789331 |
| 18 | 6  | 0 | -0.298124 | 4.497318  | -1.034673 |
| 19 | 6  | 0 | -0.965284 | 3.874552  | 0.046759  |
| 20 | 6  | 0 | -0.673832 | 2.506097  | 0.248143  |
| 21 | 6  | 0 | -1.869652 | 4.527701  | 0.920578  |
| 22 | 6  | 0 | -2.432568 | 3.813390  | 1.955808  |
| 23 | 6  | 0 | -2.139249 | 2.449961  | 2.172396  |
| 24 | 6  | 0 | -1.267032 | 1.774476  | 1.329452  |
| 25 | 6  | 0 | -2.540166 | -0.345341 | -1.705218 |
| 26 | 6  | 0 | -3.830583 | -0.873385 | -1.972744 |
| 27 | 6  | 0 | -4.301701 | -1.943501 | -1.257631 |
| 28 | 6  | 0 | -3.488998 | -2.545309 | -0.265907 |
| 29 | 6  | 0 | -2.219398 | -1.959025 | -0.057125 |
| 30 | 6  | 0 | -3.860977 | -3.682873 | 0.491301  |
| 31 | 6  | 0 | -2.965123 | -4.198647 | 1.403469  |
| 32 | 6  | 0 | -1.690422 | -3.631473 | 1.605315  |
| 33 | 6  | 0 | -1.287621 | -2.511212 | 0.888820  |
| 34 | 1  | 0 | 4.211084  | 0.285929  | 3.323221  |
| 35 | 1  | 0 | 5.704251  | -0.903396 | 1.737925  |
| 36 | 1  | 0 | 5.965498  | -2.048207 | -0.570977 |
| 37 | 1  | 0 | 4.881702  | -2.703546 | -2.697603 |
| 38 | 1  | 0 | 2.483875  | -2.201692 | -3.129210 |
| 39 | 1  | 0 | 1.125892  | 4.240556  | -2.609002 |
| 40 | 1  | 0 | -0.485759 | 5.546566  | -1.248824 |
| 41 | 1  | 0 | -2.097227 | 5.577632  | 0.767213  |
| 42 | 1  | 0 | -3.122443 | 4.309389  | 2.632528  |
| 43 | 1  | 0 | -2.588868 | 1.905659  | 2.995839  |
| 44 | 1  | 0 | -4.428962 | -0.415300 | -2.753065 |
| 45 | 1  | 0 | -5.290290 | -2.351054 | -1.454627 |
| 46 | 1  | 0 | -4.835900 | -4.134120 | 0.337152  |
| 47 | 1  | 0 | -3.241741 | -5.073811 | 1.984566  |
| 48 | 1  | 0 | -0.995542 | -4.060891 | 2.318726  |
| 49 | 13 | 0 | 0.054746  | -0.317112 | 0.125769  |
| 50 | 6  | 0 | 1.828664  | 1.662338  | -2.361512 |
| 51 | 1  | 0 | 2.632510  | 1.258858  | -1.738411 |
| 52 | 1  | 0 | 1.370920  | 0.811648  | -2.871483 |
| 53 | 1  | 0 | 2.267350  | 2.339681  | -3.095925 |
| 54 | 6  | 0 | -2.012598 | 0.803753  | -2.517965 |
| 55 | 1  | 0 | -2.107081 | 1.749309  | -1.972676 |
| 56 | 1  | 0 | -0.957158 | 0.640643  | -2.748037 |
| 57 | 1  | 0 | -2.570185 | 0.892972  | -3.452396 |
| 58 | 6  | 0 | 1.577841  | 0.901280  | 2.998163  |
| 59 | 1  | 0 | 1.204013  | 1.830783  | 2.556008  |
| 60 | 1  | 0 | 0.703267  | 0.287963  | 3.229155  |
| 61 | 1  | 0 | 2.117524  | 1.142107  | 3.915547  |

**C) mer-Al(qNO<sub>2</sub>)<sub>3</sub>**

|   |   |   |           |           |           |
|---|---|---|-----------|-----------|-----------|
| 1 | 7 | 0 | 0.582238  | 1.381049  | -0.781126 |
| 2 | 7 | 0 | 1.700063  | -0.779464 | 0.994013  |
| 3 | 7 | 0 | -1.988182 | -0.077490 | -0.578912 |
| 4 | 8 | 0 | -0.945640 | -1.651660 | 1.197489  |
| 5 | 8 | 0 | -0.394299 | 1.017390  | 1.568365  |
| 6 | 8 | 0 | 0.482098  | -1.337471 | -1.211311 |
| 7 | 6 | 0 | 2.218618  | -0.436183 | 2.155998  |
| 8 | 6 | 0 | 3.473188  | -0.930398 | 2.554920  |
| 9 | 6 | 0 | 4.173243  | -1.786848 | 1.734883  |

|    |    |   |           |           |           |
|----|----|---|-----------|-----------|-----------|
| 10 | 6  | 0 | 3.627110  | -2.179065 | 0.478717  |
| 11 | 6  | 0 | 2.362328  | -1.628406 | 0.167954  |
| 12 | 6  | 0 | 4.174753  | -3.055601 | -0.510335 |
| 13 | 6  | 0 | 3.483767  | -3.330705 | -1.677836 |
| 14 | 6  | 0 | 2.232035  | -2.777042 | -1.963336 |
| 15 | 6  | 0 | 1.636343  | -1.916216 | -1.048950 |
| 16 | 6  | 0 | 1.095375  | 1.449389  | -1.995943 |
| 17 | 6  | 0 | 1.509300  | 2.680832  | -2.534746 |
| 18 | 6  | 0 | 1.374973  | 3.839665  | -1.802303 |
| 19 | 6  | 0 | 0.820649  | 3.792685  | -0.491403 |
| 20 | 6  | 0 | 0.448576  | 2.506172  | -0.034078 |
| 21 | 6  | 0 | 0.603247  | 4.860112  | 0.433898  |
| 22 | 6  | 0 | 0.071453  | 4.615827  | 1.689125  |
| 23 | 6  | 0 | -0.287218 | 3.336738  | 2.122998  |
| 24 | 6  | 0 | -0.110379 | 2.248659  | 1.274545  |
| 25 | 6  | 0 | -2.433303 | 0.769447  | -1.487218 |
| 26 | 6  | 0 | -3.773707 | 0.751221  | -1.906164 |
| 27 | 6  | 0 | -4.651903 | -0.162856 | -1.370237 |
| 28 | 6  | 0 | -4.201849 | -1.090224 | -0.388916 |
| 29 | 6  | 0 | -2.835216 | -0.989311 | -0.030753 |
| 30 | 6  | 0 | -4.945996 | -2.107293 | 0.286814  |
| 31 | 6  | 0 | -4.340041 | -2.923656 | 1.228028  |
| 32 | 6  | 0 | -2.992370 | -2.809288 | 1.569631  |
| 33 | 6  | 0 | -2.203622 | -1.842893 | 0.953765  |
| 34 | 1  | 0 | 3.882141  | -0.634238 | 3.513848  |
| 35 | 1  | 0 | 5.135895  | -2.167691 | 2.042431  |
| 36 | 1  | 0 | 3.947220  | -4.006474 | -2.387259 |
| 37 | 1  | 0 | 1.712592  | -3.020109 | -2.882632 |
| 38 | 1  | 0 | 1.932843  | 2.710376  | -3.531965 |
| 39 | 1  | 0 | 1.689891  | 4.786056  | -2.217431 |
| 40 | 1  | 0 | -0.068410 | 5.465429  | 2.347713  |
| 41 | 1  | 0 | -0.707472 | 3.180751  | 3.109434  |
| 42 | 1  | 0 | -4.109348 | 1.461771  | -2.652396 |
| 43 | 1  | 0 | -5.683229 | -0.179794 | -1.689912 |
| 44 | 1  | 0 | -4.954774 | -3.676269 | 1.707903  |
| 45 | 1  | 0 | -2.546848 | -3.463081 | 2.309540  |
| 46 | 13 | 0 | -0.120078 | -0.290629 | 0.237752  |
| 47 | 1  | 0 | 1.622316  | 0.231026  | 2.771396  |
| 48 | 1  | 0 | 1.166996  | 0.512675  | -2.540770 |
| 49 | 1  | 0 | -1.720723 | 1.479356  | -1.895759 |
| 50 | 7  | 0 | 5.469927  | -3.699481 | -0.349465 |
| 51 | 8  | 0 | 5.854847  | -4.449423 | -1.231811 |
| 52 | 8  | 0 | 6.117690  | -3.458217 | 0.661525  |
| 53 | 7  | 0 | -6.357525 | -2.341702 | 0.031324  |
| 54 | 8  | 0 | -6.923842 | -1.648222 | -0.805689 |
| 55 | 8  | 0 | -6.919488 | -3.223042 | 0.661888  |
| 56 | 7  | 0 | 0.917823  | 6.243915  | 0.112773  |
| 57 | 8  | 0 | 0.791157  | 7.081542  | 0.990430  |
| 58 | 8  | 0 | 1.289401  | 6.506855  | -1.024575 |

**D) mer-Al(qCl)<sub>3</sub>**

|    |   |   |           |           |           |
|----|---|---|-----------|-----------|-----------|
| 1  | 7 | 0 | 0.630718  | 1.342761  | -0.764966 |
| 2  | 7 | 0 | 1.662448  | -0.870097 | 0.985391  |
| 3  | 7 | 0 | -2.023749 | 0.043411  | -0.529343 |
| 4  | 8 | 0 | -1.041994 | -1.619163 | 1.233009  |
| 5  | 8 | 0 | -0.332456 | 1.019762  | 1.612723  |
| 6  | 8 | 0 | 0.347307  | -1.345766 | -1.206084 |
| 7  | 6 | 0 | 2.245655  | -0.574758 | 2.129201  |
| 8  | 6 | 0 | 3.495899  | -1.130689 | 2.475220  |
| 9  | 6 | 0 | 4.117638  | -2.000074 | 1.608436  |
| 10 | 6 | 0 | 3.500495  | -2.334234 | 0.376649  |
| 11 | 6 | 0 | 2.250718  | -1.729630 | 0.114588  |
| 12 | 6 | 0 | 4.010781  | -3.213478 | -0.612520 |
| 13 | 6 | 0 | 3.296591  | -3.451205 | -1.763844 |
| 14 | 6 | 0 | 2.046462  | -2.841238 | -2.009607 |
| 15 | 6 | 0 | 1.491793  | -1.973294 | -1.081213 |

|    |    |   |           |           |           |
|----|----|---|-----------|-----------|-----------|
| 16 | 6  | 0 | 1.124891  | 1.404040  | -1.986827 |
| 17 | 6  | 0 | 1.606469  | 2.618676  | -2.522091 |
| 18 | 6  | 0 | 1.560529  | 3.765379  | -1.761846 |
| 19 | 6  | 0 | 1.037054  | 3.719382  | -0.445709 |
| 20 | 6  | 0 | 0.583431  | 2.458257  | 0.006339  |
| 21 | 6  | 0 | 0.927023  | 4.804487  | 0.459469  |
| 22 | 6  | 0 | 0.399093  | 4.608056  | 1.715539  |
| 23 | 6  | 0 | -0.046755 | 3.342224  | 2.154003  |
| 24 | 6  | 0 | 0.033990  | 2.239268  | 1.315592  |
| 25 | 6  | 0 | -2.449159 | 0.920179  | -1.416724 |
| 26 | 6  | 0 | -3.796961 | 0.965644  | -1.828218 |
| 27 | 6  | 0 | -4.697584 | 0.072564  | -1.296971 |
| 28 | 6  | 0 | -4.266091 | -0.880094 | -0.342052 |
| 29 | 6  | 0 | -2.896227 | -0.847502 | 0.014594  |
| 30 | 6  | 0 | -5.076626 | -1.856815 | 0.287480  |
| 31 | 6  | 0 | -4.530063 | -2.725268 | 1.204471  |
| 32 | 6  | 0 | -3.164934 | -2.680466 | 1.554505  |
| 33 | 6  | 0 | -2.316820 | -1.746991 | 0.976292  |
| 34 | 1  | 0 | 3.951081  | -0.868478 | 3.423083  |
| 35 | 1  | 0 | 5.078580  | -2.439234 | 1.858060  |
| 36 | 1  | 0 | 3.708124  | -4.131864 | -2.502258 |
| 37 | 1  | 0 | 1.503215  | -3.058909 | -2.922290 |
| 38 | 1  | 0 | 2.006401  | 2.633905  | -3.529240 |
| 39 | 1  | 0 | 1.924683  | 4.708237  | -2.157591 |
| 40 | 1  | 0 | 0.325849  | 5.456727  | 2.388279  |
| 41 | 1  | 0 | -0.459264 | 3.222073  | 3.149399  |
| 42 | 1  | 0 | -4.106369 | 1.704237  | -2.558386 |
| 43 | 1  | 0 | -5.739720 | 0.088298  | -1.599393 |
| 44 | 1  | 0 | -5.173346 | -3.464808 | 1.670907  |
| 45 | 1  | 0 | -2.762835 | -3.376591 | 2.281489  |
| 46 | 13 | 0 | -0.161707 | -0.297642 | 0.277444  |
| 47 | 1  | 0 | 1.705159  | 0.109528  | 2.777545  |
| 48 | 1  | 0 | 1.129044  | 0.472836  | -2.546248 |
| 49 | 1  | 0 | -1.713892 | 1.610356  | -1.819971 |
| 50 | 17 | 0 | 5.551142  | -3.993676 | -0.360008 |
| 51 | 17 | 0 | 1.467268  | 6.390776  | -0.028176 |
| 52 | 17 | 0 | -6.775294 | -1.952551 | -0.107312 |

**E) mer-Al(qBr)<sub>3</sub>**

|    |   |   |           |           |           |
|----|---|---|-----------|-----------|-----------|
| 1  | 7 | 0 | -0.524108 | -1.872462 | 0.981533  |
| 2  | 7 | 0 | 0.496422  | -0.949691 | -1.693722 |
| 3  | 7 | 0 | -0.322861 | 0.969797  | 1.816313  |
| 4  | 8 | 0 | 0.273390  | 1.637496  | -0.635520 |
| 5  | 8 | 0 | -1.843880 | -0.119993 | -0.393252 |
| 6  | 8 | 0 | 1.759836  | -0.483414 | 0.530249  |
| 7  | 6 | 0 | -0.214514 | -1.113877 | -2.791229 |
| 8  | 6 | 0 | 0.339898  | -1.729638 | -3.934606 |
| 9  | 6 | 0 | 1.641997  | -2.175274 | -3.900279 |
| 10 | 6 | 0 | 2.422367  | -2.010717 | -2.728777 |
| 11 | 6 | 0 | 1.787880  | -1.367599 | -1.646455 |
| 12 | 6 | 0 | 3.762846  | -2.441429 | -2.557931 |
| 13 | 6 | 0 | 4.388405  | -2.229916 | -1.350317 |
| 14 | 6 | 0 | 3.737968  | -1.580630 | -0.276652 |
| 15 | 6 | 0 | 2.439794  | -1.104881 | -0.394061 |
| 16 | 6 | 0 | 0.229383  | -2.713060 | 1.666333  |
| 17 | 6 | 0 | -0.305574 | -3.900281 | 2.212965  |
| 18 | 6 | 0 | -1.638405 | -4.192412 | 2.027480  |
| 19 | 6 | 0 | -2.464881 | -3.308592 | 1.290308  |
| 20 | 6 | 0 | -1.839530 | -2.147165 | 0.786638  |
| 21 | 6 | 0 | -3.843143 | -3.495885 | 1.018655  |
| 22 | 6 | 0 | -4.514018 | -2.550875 | 0.275244  |
| 23 | 6 | 0 | -3.874182 | -1.394691 | -0.224565 |
| 24 | 6 | 0 | -2.528726 | -1.148486 | 0.018665  |
| 25 | 6 | 0 | -0.630790 | 0.561879  | 3.031685  |
| 26 | 6 | 0 | -0.815151 | 1.467097  | 4.097013  |
| 27 | 6 | 0 | -0.666167 | 2.815693  | 3.867913  |

|    |    |   |           |           |           |
|----|----|---|-----------|-----------|-----------|
| 28 | 6  | 0 | -0.333944 | 3.283701  | 2.574117  |
| 29 | 6  | 0 | -0.175018 | 2.300638  | 1.571786  |
| 30 | 6  | 0 | -0.153304 | 4.643011  | 2.217659  |
| 31 | 6  | 0 | 0.170824  | 4.958674  | 0.917808  |
| 32 | 6  | 0 | 0.325060  | 3.967752  | -0.075393 |
| 33 | 6  | 0 | 0.156321  | 2.619505  | 0.210640  |
| 34 | 1  | 0 | -0.268942 | -1.843398 | -4.823850 |
| 35 | 1  | 0 | 2.083671  | -2.656610 | -4.768984 |
| 36 | 1  | 0 | 5.409426  | -2.565245 | -1.200776 |
| 37 | 1  | 0 | 0.342619  | -4.565241 | 2.771753  |
| 38 | 1  | 0 | -2.067033 | -5.102210 | 2.439727  |
| 39 | 1  | 0 | -5.568284 | -2.683526 | 0.054981  |
| 40 | 1  | 0 | -1.069970 | 1.087160  | 5.079319  |
| 41 | 1  | 0 | -0.801869 | 3.532794  | 4.673192  |
| 42 | 1  | 0 | 0.314947  | 5.994960  | 0.630184  |
| 43 | 13 | 0 | -0.016111 | -0.055586 | 0.062256  |
| 44 | 1  | 0 | -1.237757 | -0.748372 | -2.757533 |
| 45 | 1  | 0 | 1.272530  | -2.431277 | 1.787133  |
| 46 | 1  | 0 | -0.737800 | -0.509076 | 3.178606  |
| 47 | 1  | 0 | 4.281741  | -2.937166 | -3.371341 |
| 48 | 1  | 0 | -4.356349 | -4.376227 | 1.390575  |
| 49 | 1  | 0 | -0.269736 | 5.419415  | 2.966019  |
| 50 | 35 | 0 | 0.774373  | 4.469435  | -1.833543 |
| 51 | 35 | 0 | 4.633262  | -1.350429 | 1.366617  |
| 52 | 35 | 0 | -4.853665 | -0.155429 | -1.248128 |

**F) fac-Alq<sub>3</sub>**

|    |   |   |           |           |           |
|----|---|---|-----------|-----------|-----------|
| 1  | 7 | 0 | -0.464892 | -1.620584 | 0.450246  |
| 2  | 7 | 0 | 1.635795  | 0.402247  | 0.455891  |
| 3  | 7 | 0 | -1.163209 | 1.210675  | 0.456556  |
| 4  | 8 | 0 | 0.255720  | 1.607743  | -1.702193 |
| 5  | 8 | 0 | -1.515330 | -0.581502 | -1.705891 |
| 6  | 8 | 0 | 1.268755  | -1.022872 | -1.704665 |
| 7  | 6 | 0 | 1.757770  | 1.157771  | 1.529999  |
| 8  | 6 | 0 | 2.992319  | 1.309819  | 2.198093  |
| 9  | 6 | 0 | 4.103408  | 0.655876  | 1.719285  |
| 10 | 6 | 0 | 4.007818  | -0.154363 | 0.559854  |
| 11 | 6 | 0 | 2.728126  | -0.239492 | -0.040697 |
| 12 | 6 | 0 | 5.079503  | -0.868499 | -0.027157 |
| 13 | 6 | 0 | 4.837454  | -1.618157 | -1.160922 |
| 14 | 6 | 0 | 3.565601  | -1.701324 | -1.765172 |
| 15 | 6 | 0 | 2.483435  | -1.014993 | -1.226531 |
| 16 | 6 | 0 | 0.126539  | -2.106511 | 1.524401  |
| 17 | 6 | 0 | -0.361821 | -3.251472 | 2.190687  |
| 18 | 6 | 0 | -1.486819 | -3.881547 | 1.712192  |
| 19 | 6 | 0 | -2.142445 | -3.387344 | 0.556466  |
| 20 | 6 | 0 | -1.572297 | -2.238209 | -0.043369 |
| 21 | 6 | 0 | -3.300379 | -3.951908 | -0.028724 |
| 22 | 6 | 0 | -3.829119 | -3.362278 | -1.159670 |
| 23 | 6 | 0 | -3.262028 | -2.220638 | -1.763316 |
| 24 | 6 | 0 | -2.122371 | -1.632931 | -1.226255 |
| 25 | 6 | 0 | -1.879509 | 0.936352  | 1.529464  |
| 26 | 6 | 0 | -2.630810 | 1.927890  | 2.197262  |
| 27 | 6 | 0 | -2.622375 | 3.217335  | 1.718127  |
| 28 | 6 | 0 | -1.871188 | 3.542058  | 0.560565  |
| 29 | 6 | 0 | -1.154509 | 2.477814  | -0.038956 |
| 30 | 6 | 0 | -1.788560 | 4.827649  | -0.025997 |
| 31 | 6 | 0 | -1.017555 | 4.993264  | -1.159278 |
| 32 | 6 | 0 | -0.305469 | 3.935121  | -1.761113 |
| 33 | 6 | 0 | -0.357399 | 2.655021  | -1.222406 |
| 34 | 1 | 0 | 0.862230  | 1.659842  | 1.884836  |
| 35 | 1 | 0 | 3.045771  | 1.941989  | 3.077061  |
| 36 | 1 | 0 | 5.063206  | 0.757354  | 2.219611  |
| 37 | 1 | 0 | 6.069166  | -0.816305 | 0.414647  |
| 38 | 1 | 0 | 5.659078  | -2.164790 | -1.615286 |
| 39 | 1 | 0 | 3.412992  | -2.291329 | -2.661847 |

|    |    |   |           |           |           |
|----|----|---|-----------|-----------|-----------|
| 40 | 1  | 0 | 1.010128  | -1.584718 | 1.880943  |
| 41 | 1  | 0 | 0.158077  | -3.617975 | 3.068309  |
| 42 | 1  | 0 | -1.882136 | -4.762345 | 2.211808  |
| 43 | 1  | 0 | -3.753959 | -4.832920 | 0.413595  |
| 44 | 1  | 0 | -4.716819 | -3.795092 | -1.612418 |
| 45 | 1  | 0 | -3.698342 | -1.788413 | -2.657097 |
| 46 | 1  | 0 | -1.862522 | -0.090210 | 1.884933  |
| 47 | 1  | 0 | -3.204742 | 1.656827  | 3.075872  |
| 48 | 1  | 0 | -3.194230 | 3.996000  | 2.216749  |
| 49 | 1  | 0 | -2.330566 | 5.658102  | 0.414273  |
| 50 | 1  | 0 | -0.954634 | 5.977961  | -1.614159 |
| 51 | 1  | 0 | 0.285342  | 4.099116  | -2.655442 |
| 52 | 13 | 0 | 0.003155  | -0.001096 | -0.820325 |

**G) fac-Al(qCH<sub>3</sub>)<sub>3</sub>**

|    |    |   |           |           |           |
|----|----|---|-----------|-----------|-----------|
| 1  | 7  | 0 | 1.966800  | 0.285249  | 0.547227  |
| 2  | 7  | 0 | -1.180642 | 1.249761  | 0.562650  |
| 3  | 7  | 0 | -0.609917 | -1.815768 | 0.291066  |
| 4  | 8  | 0 | -1.370579 | -0.255884 | -1.691577 |
| 5  | 8  | 0 | 1.298759  | -1.137874 | -1.579966 |
| 6  | 8  | 0 | 0.597447  | 1.566759  | -1.397630 |
| 7  | 6  | 0 | -2.051629 | 1.075192  | 1.545658  |
| 8  | 6  | 0 | -2.992334 | 2.086249  | 1.881232  |
| 9  | 6  | 0 | -3.005881 | 3.276308  | 1.205643  |
| 10 | 6  | 0 | -2.071402 | 3.502538  | 0.167047  |
| 11 | 6  | 0 | -1.182808 | 2.439021  | -0.123649 |
| 12 | 6  | 0 | -1.983969 | 4.712030  | -0.561848 |
| 13 | 6  | 0 | -1.022963 | 4.833046  | -1.542812 |
| 14 | 6  | 0 | -0.133241 | 3.784866  | -1.843550 |
| 15 | 6  | 0 | -0.196933 | 2.575456  | -1.160892 |
| 16 | 6  | 0 | 2.271135  | 1.038591  | 1.593915  |
| 17 | 6  | 0 | 3.622325  | 1.248474  | 1.977161  |
| 18 | 6  | 0 | 4.644882  | 0.675669  | 1.268661  |
| 19 | 6  | 0 | 4.351361  | -0.123121 | 0.138491  |
| 20 | 6  | 0 | 2.981773  | -0.272546 | -0.185190 |
| 21 | 6  | 0 | 5.331600  | -0.764025 | -0.657324 |
| 22 | 6  | 0 | 4.926959  | -1.522311 | -1.734443 |
| 23 | 6  | 0 | 3.567230  | -1.671471 | -2.072880 |
| 24 | 6  | 0 | 2.577087  | -1.049325 | -1.323516 |
| 25 | 6  | 0 | -0.138003 | -2.633961 | 1.221356  |
| 26 | 6  | 0 | -0.873217 | -3.779853 | 1.620602  |
| 27 | 6  | 0 | -2.083074 | -4.067993 | 1.043460  |
| 28 | 6  | 0 | -2.588293 | -3.234900 | 0.018555  |
| 29 | 6  | 0 | -1.790106 | -2.119701 | -0.332089 |
| 30 | 6  | 0 | -3.809893 | -3.457375 | -0.661216 |
| 31 | 6  | 0 | -4.183793 | -2.586314 | -1.662703 |
| 32 | 6  | 0 | -3.386041 | -1.486027 | -2.035519 |
| 33 | 6  | 0 | -2.178191 | -1.233846 | -1.393937 |
| 34 | 1  | 0 | -3.691754 | 1.895635  | 2.688202  |
| 35 | 1  | 0 | -3.718775 | 4.055884  | 1.462707  |
| 36 | 1  | 0 | -2.670502 | 5.521787  | -0.336858 |
| 37 | 1  | 0 | -0.947599 | 5.759138  | -2.105529 |
| 38 | 1  | 0 | 0.613011  | 3.890988  | -2.623059 |
| 39 | 1  | 0 | 3.825705  | 1.868877  | 2.843137  |
| 40 | 1  | 0 | 5.680334  | 0.828349  | 1.562629  |
| 41 | 1  | 0 | 6.381466  | -0.646301 | -0.409183 |
| 42 | 1  | 0 | 5.673425  | -2.016734 | -2.349436 |
| 43 | 1  | 0 | 3.266132  | -2.260381 | -2.932174 |
| 44 | 1  | 0 | -0.458768 | -4.419848 | 2.391689  |
| 45 | 1  | 0 | -2.653921 | -4.939451 | 1.354229  |
| 46 | 1  | 0 | -4.423575 | -4.311063 | -0.392815 |
| 47 | 1  | 0 | -5.118137 | -2.752960 | -2.191050 |
| 48 | 1  | 0 | -3.687793 | -0.824867 | -2.840273 |
| 49 | 13 | 0 | 0.148234  | -0.051274 | -0.653712 |
| 50 | 6  | 0 | 1.183503  | -2.349025 | 1.875735  |
| 51 | 1  | 0 | 1.179362  | -1.380664 | 2.384930  |

|    |   |   |           |           |          |
|----|---|---|-----------|-----------|----------|
| 52 | 1 | 0 | 1.413280  | -3.123358 | 2.609366 |
| 53 | 1 | 0 | 1.983712  | -2.324488 | 1.130651 |
| 54 | 6 | 0 | 1.185818  | 1.688783  | 2.404499 |
| 55 | 1 | 0 | 0.712737  | 2.497483  | 1.839160 |
| 56 | 1 | 0 | 0.405931  | 0.973228  | 2.669773 |
| 57 | 1 | 0 | 1.602319  | 2.106054  | 3.322919 |
| 58 | 6 | 0 | -2.059427 | -0.186975 | 2.366789 |
| 59 | 1 | 0 | -2.637636 | -0.975526 | 1.873095 |
| 60 | 1 | 0 | -1.051276 | -0.568576 | 2.531522 |
| 61 | 1 | 0 | -2.518260 | 0.009913  | 3.337991 |

**H) fac-Al(qNO<sub>2</sub>)<sub>3</sub>**

|    |    |   |           |           |           |
|----|----|---|-----------|-----------|-----------|
| 1  | 7  | 0 | 1.692394  | 0.110042  | 0.366440  |
| 2  | 7  | 0 | -0.945468 | 1.398082  | 0.359936  |
| 3  | 7  | 0 | -0.741969 | -1.530491 | 0.355462  |
| 4  | 8  | 0 | -1.574426 | -0.326938 | -1.783926 |
| 5  | 8  | 0 | 1.081156  | -1.211068 | -1.778375 |
| 6  | 8  | 0 | 0.517325  | 1.530006  | -1.774517 |
| 7  | 6  | 0 | -1.701265 | 1.234043  | 1.429993  |
| 8  | 6  | 0 | -2.298633 | 2.329210  | 2.076568  |
| 9  | 6  | 0 | -2.099093 | 3.605492  | 1.601262  |
| 10 | 6  | 0 | -1.293769 | 3.815428  | 0.445743  |
| 11 | 6  | 0 | -0.746334 | 2.646762  | -0.139942 |
| 12 | 6  | 0 | -0.972438 | 5.044161  | -0.208226 |
| 13 | 6  | 0 | -0.184814 | 5.058086  | -1.348921 |
| 14 | 6  | 0 | 0.344270  | 3.898542  | -1.913766 |
| 15 | 6  | 0 | 0.078420  | 2.662612  | -1.330238 |
| 16 | 6  | 0 | 1.923632  | 0.840727  | 1.441777  |
| 17 | 6  | 0 | 3.169680  | 0.808802  | 2.090173  |
| 18 | 6  | 0 | 4.177202  | 0.001756  | 1.611627  |
| 19 | 6  | 0 | 3.961633  | -0.791483 | 0.449616  |
| 20 | 6  | 0 | 2.676646  | -0.680889 | -0.138343 |
| 21 | 6  | 0 | 4.868891  | -1.678337 | -0.206957 |
| 22 | 6  | 0 | 4.488458  | -2.366083 | -1.349387 |
| 23 | 6  | 0 | 3.222649  | -2.240883 | -1.919409 |
| 24 | 6  | 0 | 2.281379  | -1.398256 | -1.333397 |
| 25 | 6  | 0 | -0.225684 | -2.106457 | 1.425196  |
| 26 | 6  | 0 | -0.881993 | -3.167835 | 2.070907  |
| 27 | 6  | 0 | -2.091524 | -3.622597 | 1.596979  |
| 28 | 6  | 0 | -2.673624 | -3.024123 | 0.443731  |
| 29 | 6  | 0 | -1.924336 | -1.975180 | -0.147167 |
| 30 | 6  | 0 | -3.899797 | -3.353071 | -0.209361 |
| 31 | 6  | 0 | -4.297131 | -2.681096 | -1.355346 |
| 32 | 6  | 0 | -3.547240 | -1.651702 | -1.923901 |
| 33 | 6  | 0 | -2.342020 | -1.269035 | -1.339673 |
| 34 | 1  | 0 | -2.914725 | 2.160193  | 2.952041  |
| 35 | 1  | 0 | -2.553490 | 4.451406  | 2.096870  |
| 36 | 1  | 0 | 0.021490  | 6.021429  | -1.801484 |
| 37 | 1  | 0 | 0.956920  | 3.939924  | -2.806041 |
| 38 | 1  | 0 | 3.330080  | 1.425020  | 2.967158  |
| 39 | 1  | 0 | 5.134291  | -0.029112 | 2.110534  |
| 40 | 1  | 0 | 5.219454  | -3.023715 | -1.804396 |
| 41 | 1  | 0 | 2.956673  | -2.786324 | -2.816711 |
| 42 | 1  | 0 | -0.428750 | -3.620598 | 2.945113  |
| 43 | 1  | 0 | -2.602724 | -4.432487 | 2.095698  |
| 44 | 1  | 0 | -5.233571 | -2.980167 | -1.811551 |
| 45 | 1  | 0 | -3.883109 | -1.143545 | -2.819723 |
| 46 | 13 | 0 | 0.006646  | -0.003863 | -0.865948 |
| 47 | 1  | 0 | 1.111411  | 1.466830  | 1.799359  |
| 48 | 1  | 0 | -1.838535 | 0.218080  | 1.788957  |
| 49 | 1  | 0 | 0.722961  | -1.722188 | 1.787745  |
| 50 | 7  | 0 | -4.789451 | -4.392532 | 0.281748  |
| 51 | 8  | 0 | -4.533917 | -4.921662 | 1.357497  |
| 52 | 8  | 0 | -5.762582 | -4.681076 | -0.395564 |
| 53 | 7  | 0 | -1.442712 | 6.331072  | 0.277178  |
| 54 | 8  | 0 | -2.061211 | 6.364700  | 1.334560  |

|    |   |   |           |           |           |
|----|---|---|-----------|-----------|-----------|
| 55 | 8 | 0 | -1.191525 | 7.324104  | -0.385765 |
| 56 | 7 | 0 | 6.219164  | -1.913365 | 0.279048  |
| 57 | 8 | 0 | 6.567657  | -1.369280 | 1.320672  |
| 58 | 8 | 0 | 6.944090  | -2.652004 | -0.367352 |

**I) fac-Al(qCl)<sub>3</sub>**

|    |    |   |           |           |           |
|----|----|---|-----------|-----------|-----------|
| 1  | 7  | 0 | 1.423457  | -0.960682 | -0.333845 |
| 2  | 7  | 0 | -1.491337 | -0.729959 | -0.352864 |
| 3  | 7  | 0 | 0.161215  | 1.668834  | -0.312960 |
| 4  | 8  | 0 | -1.203192 | 1.037316  | 1.824570  |
| 5  | 8  | 0 | 1.562637  | 0.479908  | 1.839201  |
| 6  | 8  | 0 | -0.316438 | -1.627272 | 1.800865  |
| 7  | 6  | 0 | -2.053797 | -0.205348 | -1.424928 |
| 8  | 6  | 0 | -3.122659 | -0.840816 | -2.091229 |
| 9  | 6  | 0 | -3.598695 | -2.040890 | -1.618154 |
| 10 | 6  | 0 | -3.018593 | -2.623601 | -0.464782 |
| 11 | 6  | 0 | -1.954852 | -1.909349 | 0.141722  |
| 12 | 6  | 0 | -3.402559 | -3.846794 | 0.135747  |
| 13 | 6  | 0 | -2.755225 | -4.298834 | 1.263954  |
| 14 | 6  | 0 | -1.702000 | -3.578102 | 1.861599  |
| 15 | 6  | 0 | -1.277201 | -2.370079 | 1.324076  |
| 16 | 6  | 0 | 1.273611  | -1.705994 | -1.411430 |
| 17 | 6  | 0 | 2.377818  | -2.269833 | -2.084915 |
| 18 | 6  | 0 | 3.649274  | -2.039052 | -1.614558 |
| 19 | 6  | 0 | 3.838623  | -1.248803 | -0.453592 |
| 20 | 6  | 0 | 2.669907  | -0.734701 | 0.161659  |
| 21 | 6  | 0 | 5.080159  | -0.929013 | 0.146749  |
| 22 | 6  | 0 | 5.121055  | -0.154284 | 1.284933  |
| 23 | 6  | 0 | 3.951684  | 0.345620  | 1.891645  |
| 24 | 6  | 0 | 2.701692  | 0.068888  | 1.353493  |
| 25 | 6  | 0 | 0.898082  | 1.927354  | -1.375997 |
| 26 | 6  | 0 | 0.830309  | 3.168127  | -2.044660 |
| 27 | 6  | 0 | -0.024979 | 4.141131  | -1.583264 |
| 28 | 6  | 0 | -0.820492 | 3.894050  | -0.436812 |
| 29 | 6  | 0 | -0.679319 | 2.621848  | 0.172436  |
| 30 | 6  | 0 | -1.739264 | 4.796754  | 0.150978  |
| 31 | 6  | 0 | -2.450640 | 4.429877  | 1.271961  |
| 32 | 6  | 0 | -2.299436 | 3.163864  | 1.871620  |
| 33 | 6  | 0 | -1.414671 | 2.231605  | 1.344547  |
| 34 | 1  | 0 | -3.556751 | -0.373327 | -2.967211 |
| 35 | 1  | 0 | -4.419142 | -2.547624 | -2.115679 |
| 36 | 1  | 0 | -3.072102 | -5.238551 | 1.705501  |
| 37 | 1  | 0 | -1.216708 | -3.955051 | 2.754538  |
| 38 | 1  | 0 | 2.208300  | -2.878256 | -2.965671 |
| 39 | 1  | 0 | 4.512894  | -2.460752 | -2.118970 |
| 40 | 1  | 0 | 6.086289  | 0.073694  | 1.726304  |
| 41 | 1  | 0 | 4.013120  | 0.946781  | 2.791487  |
| 42 | 1  | 0 | 1.453740  | 3.338386  | -2.914713 |
| 43 | 1  | 0 | -0.097266 | 5.100997  | -2.084738 |
| 44 | 1  | 0 | -3.147468 | 5.141377  | 1.703738  |
| 45 | 1  | 0 | -2.868239 | 2.904398  | 2.756945  |
| 46 | 13 | 0 | 0.026934  | -0.026669 | 0.941426  |
| 47 | 1  | 0 | 0.258598  | -1.864897 | -1.764453 |
| 48 | 1  | 0 | -1.656165 | 0.741267  | -1.779464 |
| 49 | 1  | 0 | 1.559237  | 1.137695  | -1.722386 |
| 50 | 17 | 0 | -1.966652 | 6.377305  | -0.552477 |
| 51 | 17 | 0 | -4.703676 | -4.779431 | -0.562613 |
| 52 | 17 | 0 | 6.560159  | -1.518354 | -0.567261 |

**J) fac-Al(qBr)<sub>3</sub>**

|   |   |   |           |           |           |
|---|---|---|-----------|-----------|-----------|
| 1 | 7 | 0 | 1.680015  | -0.123819 | 1.476215  |
| 2 | 7 | 0 | -0.754668 | 1.516313  | 1.459492  |
| 3 | 7 | 0 | -0.955554 | -1.400041 | 1.466973  |
| 4 | 8 | 0 | -1.620259 | -0.084084 | -0.688516 |
| 5 | 8 | 0 | 0.881162  | -1.373562 | -0.669753 |



|    |    |   |           |           |           |
|----|----|---|-----------|-----------|-----------|
| 6  | 8  | 0 | 0.749758  | 1.436500  | -0.673899 |
| 7  | 6  | 0 | -1.536751 | 1.485621  | 2.521938  |
| 8  | 6  | 0 | -1.979315 | 2.664374  | 3.158696  |
| 9  | 6  | 0 | -1.586327 | 3.886088  | 2.661962  |
| 10 | 6  | 0 | -0.751890 | 3.952966  | 1.519485  |
| 11 | 6  | 0 | -0.368468 | 2.716769  | 0.947344  |
| 12 | 6  | 0 | -0.283020 | 5.147227  | 0.921262  |
| 13 | 6  | 0 | 0.529686  | 5.066893  | -0.188553 |
| 14 | 6  | 0 | 0.903950  | 3.828511  | -0.747317 |
| 15 | 6  | 0 | 0.466006  | 2.620236  | -0.219837 |
| 16 | 6  | 0 | 2.032723  | 0.567885  | 2.542731  |
| 17 | 6  | 0 | 3.272617  | 0.366859  | 3.186211  |
| 18 | 6  | 0 | 4.143029  | -0.577745 | 2.692016  |
| 19 | 6  | 0 | 3.796335  | -1.332606 | 1.544596  |
| 20 | 6  | 0 | 2.536207  | -1.050335 | 0.965875  |
| 21 | 6  | 0 | 4.602740  | -2.330246 | 0.945329  |
| 22 | 6  | 0 | 4.136123  | -2.989003 | -0.171668 |
| 23 | 6  | 0 | 2.880186  | -2.694652 | -0.738166 |
| 24 | 6  | 0 | 2.045632  | -1.719203 | -0.209076 |
| 25 | 6  | 0 | -0.542922 | -2.053869 | 2.536311  |
| 26 | 6  | 0 | -1.349927 | -3.014688 | 3.181439  |
| 27 | 6  | 0 | -2.605590 | -3.281626 | 2.685455  |
| 28 | 6  | 0 | -3.073958 | -2.602543 | 1.534515  |
| 29 | 6  | 0 | -2.188186 | -1.664565 | 0.954213  |
| 30 | 6  | 0 | -4.341423 | -2.793060 | 0.933696  |
| 31 | 6  | 0 | -4.668556 | -2.063167 | -0.188437 |
| 32 | 6  | 0 | -3.774142 | -1.135235 | -0.757690 |
| 33 | 6  | 0 | -2.511634 | -0.908651 | -0.225759 |
| 34 | 1  | 0 | -2.622705 | 2.590150  | 4.027572  |
| 35 | 1  | 0 | -1.911602 | 4.808437  | 3.136160  |
| 36 | 1  | 0 | 0.897450  | 5.973106  | -0.658831 |
| 37 | 1  | 0 | 3.521022  | 0.960917  | 4.057807  |
| 38 | 1  | 0 | 5.103195  | -0.748996 | 3.171603  |
| 39 | 1  | 0 | 4.742640  | -3.755452 | -0.643427 |
| 40 | 1  | 0 | -0.967980 | -3.528731 | 4.055768  |
| 41 | 1  | 0 | -3.245835 | -4.016899 | 3.166026  |
| 42 | 1  | 0 | -5.636304 | -2.196600 | -0.660918 |
| 43 | 13 | 0 | -0.003894 | -0.006734 | 0.210174  |
| 44 | 1  | 0 | 1.321360  | 1.302534  | 2.910149  |
| 45 | 1  | 0 | -1.826048 | 0.505541  | 2.891289  |
| 46 | 1  | 0 | 0.452056  | -1.816959 | 2.903641  |
| 47 | 1  | 0 | 5.575609  | -2.566110 | 1.362925  |
| 48 | 1  | 0 | -0.565141 | 6.109237  | 1.335621  |
| 49 | 1  | 0 | -5.040523 | -3.507702 | 1.354547  |
| 50 | 35 | 0 | 2.298365  | -3.648161 | -2.294633 |
| 51 | 35 | 0 | -4.292486 | -0.157548 | -2.321207 |
| 52 | 35 | 0 | 2.042145  | 3.795527  | -2.287674 |

**K) mer-Gaq<sub>3</sub>**

|    |   |   |           |           |           |
|----|---|---|-----------|-----------|-----------|
| 1  | 7 | 0 | -0.660586 | 1.442007  | 0.794420  |
| 2  | 7 | 0 | -1.730852 | -0.927661 | -0.917108 |
| 3  | 7 | 0 | 2.086241  | 0.099088  | 0.568665  |
| 4  | 8 | 0 | 1.128691  | -1.655526 | -1.194308 |
| 5  | 8 | 0 | 0.265167  | 1.073227  | -1.656890 |
| 6  | 8 | 0 | -0.395522 | -1.322907 | 1.344529  |
| 7  | 6 | 0 | -2.323149 | -0.691394 | -2.069370 |
| 8  | 6 | 0 | -3.590639 | -1.240443 | -2.363328 |
| 9  | 6 | 0 | -4.212802 | -2.034683 | -1.428213 |
| 10 | 6 | 0 | -3.589621 | -2.301689 | -0.182395 |
| 11 | 6 | 0 | -2.320403 | -1.711110 | 0.020969  |
| 12 | 6 | 0 | -4.141244 | -3.102525 | 0.847363  |
| 13 | 6 | 0 | -3.419713 | -3.280586 | 2.008543  |
| 14 | 6 | 0 | -2.150272 | -2.696107 | 2.213385  |
| 15 | 6 | 0 | -1.565012 | -1.904383 | 1.232466  |
| 16 | 6 | 0 | -1.126061 | 1.539603  | 2.023768  |
| 17 | 6 | 0 | -1.620864 | 2.765209  | 2.524287  |

|    |    |   |           |           |           |
|----|----|---|-----------|-----------|-----------|
| 18 | 6  | 0 | -1.615533 | 3.875828  | 1.711861  |
| 19 | 6  | 0 | -1.125003 | 3.791162  | 0.383668  |
| 20 | 6  | 0 | -0.654512 | 2.520287  | -0.027538 |
| 21 | 6  | 0 | -1.079482 | 4.864293  | -0.538447 |
| 22 | 6  | 0 | -0.579477 | 4.631392  | -1.803134 |
| 23 | 6  | 0 | -0.113182 | 3.365596  | -2.218462 |
| 24 | 6  | 0 | -0.137426 | 2.279384  | -1.350210 |
| 25 | 6  | 0 | 2.500634  | 0.998121  | 1.436905  |
| 26 | 6  | 0 | 3.852532  | 1.075038  | 1.834680  |
| 27 | 6  | 0 | 4.758445  | 0.187838  | 1.302650  |
| 28 | 6  | 0 | 4.338833  | -0.788545 | 0.365019  |
| 29 | 6  | 0 | 2.963280  | -0.785702 | 0.025612  |
| 30 | 6  | 0 | 5.190225  | -1.744026 | -0.239026 |
| 31 | 6  | 0 | 4.650588  | -2.638986 | -1.139496 |
| 32 | 6  | 0 | 3.283375  | -2.637464 | -1.485551 |
| 33 | 6  | 0 | 2.406329  | -1.719794 | -0.919490 |
| 34 | 1  | 0 | -1.781329 | -0.058413 | -2.766979 |
| 35 | 1  | 0 | -4.053355 | -1.031180 | -3.320832 |
| 36 | 1  | 0 | -5.188337 | -2.468432 | -1.633574 |
| 37 | 1  | 0 | -5.113808 | -3.563640 | 0.709695  |
| 38 | 1  | 0 | -3.836235 | -3.896316 | 2.800764  |
| 39 | 1  | 0 | -1.606361 | -2.867409 | 3.136117  |
| 40 | 1  | 0 | -1.100444 | 0.629839  | 2.617811  |
| 41 | 1  | 0 | -1.997047 | 2.813070  | 3.539746  |
| 42 | 1  | 0 | -1.990318 | 4.828504  | 2.077577  |
| 43 | 1  | 0 | -1.434776 | 5.845912  | -0.242722 |
| 44 | 1  | 0 | -0.540856 | 5.451389  | -2.514783 |
| 45 | 1  | 0 | 0.274912  | 3.220129  | -3.220758 |
| 46 | 1  | 0 | 1.753874  | 1.680254  | 1.833983  |
| 47 | 1  | 0 | 4.155721  | 1.830119  | 2.550762  |
| 48 | 1  | 0 | 5.805144  | 0.225541  | 1.593768  |
| 49 | 1  | 0 | 6.245762  | -1.760070 | 0.011935  |
| 50 | 1  | 0 | 5.298971  | -3.375386 | -1.605965 |
| 51 | 1  | 0 | 2.890820  | -3.352673 | -2.199815 |
| 52 | 31 | 0 | 0.157687  | -0.287146 | -0.239817 |

**L) fac-Gag3**

|    |   |   |           |           |           |
|----|---|---|-----------|-----------|-----------|
| 1  | 7 | 0 | 1.517864  | -0.772993 | 0.527822  |
| 2  | 7 | 0 | -0.128755 | 1.731369  | 0.467286  |
| 3  | 7 | 0 | -1.490079 | -0.953449 | 0.500749  |
| 4  | 8 | 0 | -1.651703 | 0.479227  | -1.742923 |
| 5  | 8 | 0 | 0.363878  | -1.712160 | -1.690020 |
| 6  | 8 | 0 | 1.254499  | 1.101059  | -1.729237 |
| 7  | 6 | 0 | -0.855066 | 2.000367  | 1.532984  |
| 8  | 6 | 0 | -0.738334 | 3.228005  | 2.222407  |
| 9  | 6 | 0 | 0.159225  | 4.166512  | 1.771067  |
| 10 | 6 | 0 | 0.949292  | 3.906666  | 0.622549  |
| 11 | 6 | 0 | 0.753743  | 2.649986  | -0.005929 |
| 12 | 6 | 0 | 1.897131  | 4.805105  | 0.079854  |
| 13 | 6 | 0 | 2.599137  | 4.428952  | -1.047415 |
| 14 | 6 | 0 | 2.407414  | 3.184468  | -1.680015 |
| 15 | 6 | 0 | 1.485056  | 2.267024  | -1.186272 |
| 16 | 6 | 0 | 2.066731  | -0.251892 | 1.606725  |
| 17 | 6 | 0 | 3.112748  | -0.902531 | 2.297703  |
| 18 | 6 | 0 | 3.571454  | -2.112045 | 1.832499  |
| 19 | 6 | 0 | 3.004427  | -2.693228 | 0.670546  |
| 20 | 6 | 0 | 1.962867  | -1.961898 | 0.043579  |
| 21 | 6 | 0 | 3.405906  | -3.928978 | 0.112439  |
| 22 | 6 | 0 | 2.771665  | -4.380208 | -1.027059 |
| 23 | 6 | 0 | 1.739840  | -3.657106 | -1.658945 |
| 24 | 6 | 0 | 1.310277  | -2.435341 | -1.151056 |
| 25 | 6 | 0 | -1.346822 | -1.681463 | 1.588994  |
| 26 | 6 | 0 | -2.459882 | -2.195594 | 2.290429  |
| 27 | 6 | 0 | -3.726181 | -1.927793 | 1.826387  |
| 28 | 6 | 0 | -3.909686 | -1.153559 | 0.652548  |
| 29 | 6 | 0 | -2.730779 | -0.689675 | 0.014507  |

|    |    |   |           |           |           |
|----|----|---|-----------|-----------|-----------|
| 30 | 6  | 0 | -5.165437 | -0.825018 | 0.091097  |
| 31 | 6  | 0 | -5.199516 | -0.067075 | -1.062037 |
| 32 | 6  | 0 | -4.032138 | 0.392217  | -1.704231 |
| 33 | 6  | 0 | -2.773278 | 0.093686  | -1.193608 |
| 34 | 1  | 0 | -1.547351 | 1.231020  | 1.865842  |
| 35 | 1  | 0 | -1.355863 | 3.411088  | 3.094317  |
| 36 | 1  | 0 | 0.271813  | 5.117687  | 2.285238  |
| 37 | 1  | 0 | 2.055090  | 5.770467  | 0.549372  |
| 38 | 1  | 0 | 3.326921  | 5.115484  | -1.470551 |
| 39 | 1  | 0 | 2.969460  | 2.920393  | -2.568829 |
| 40 | 1  | 0 | 1.677335  | 0.703815  | 1.947799  |
| 41 | 1  | 0 | 3.538326  | -0.438827 | 3.180134  |
| 42 | 1  | 0 | 4.375152  | -2.633328 | 2.346206  |
| 43 | 1  | 0 | 4.202359  | -4.497920 | 0.580809  |
| 44 | 1  | 0 | 3.077462  | -5.327360 | -1.462598 |
| 45 | 1  | 0 | 1.267614  | -4.035055 | -2.558959 |
| 46 | 1  | 0 | -0.330758 | -1.867135 | 1.927505  |
| 47 | 1  | 0 | -2.298718 | -2.791848 | 3.181305  |
| 48 | 1  | 0 | -4.599312 | -2.308909 | 2.350111  |
| 49 | 1  | 0 | -6.076573 | -1.173497 | 0.566239  |
| 50 | 1  | 0 | -6.161016 | 0.186508  | -1.499616 |
| 51 | 1  | 0 | -4.091699 | 0.979447  | -2.613885 |
| 52 | 31 | 0 | -0.028568 | -0.029001 | -0.842338 |

**M) mer-lnq<sub>3</sub>**

|    |   |   |           |           |           |
|----|---|---|-----------|-----------|-----------|
| 1  | 7 | 0 | -0.459872 | 1.634259  | 0.788197  |
| 2  | 7 | 0 | -1.981240 | -0.833627 | -0.915369 |
| 3  | 7 | 0 | 2.161801  | -0.139755 | 0.576144  |
| 4  | 8 | 0 | 1.037096  | -1.884328 | -1.154307 |
| 5  | 8 | 0 | 0.253422  | 1.106188  | -1.745895 |
| 6  | 8 | 0 | -0.741752 | -1.236883 | 1.444323  |
| 7  | 6 | 0 | -2.539678 | -0.600289 | -2.086676 |
| 8  | 6 | 0 | -3.860739 | -1.009727 | -2.367447 |
| 9  | 6 | 0 | -4.577622 | -1.665230 | -1.394334 |
| 10 | 6 | 0 | -4.000493 | -1.922815 | -0.124494 |
| 11 | 6 | 0 | -2.669584 | -1.476324 | 0.067434  |
| 12 | 6 | 0 | -4.665471 | -2.582993 | 0.937185  |
| 13 | 6 | 0 | -3.994060 | -2.770226 | 2.126509  |
| 14 | 6 | 0 | -2.669768 | -2.327748 | 2.325062  |
| 15 | 6 | 0 | -1.969500 | -1.674332 | 1.315994  |
| 16 | 6 | 0 | -0.837140 | 1.826595  | 2.037645  |
| 17 | 6 | 0 | -1.074240 | 3.123544  | 2.543562  |
| 18 | 6 | 0 | -0.908053 | 4.206826  | 1.712273  |
| 19 | 6 | 0 | -0.514994 | 4.025023  | 0.361386  |
| 20 | 6 | 0 | -0.303068 | 2.686676  | -0.057934 |
| 21 | 6 | 0 | -0.332706 | 5.073704  | -0.571418 |
| 22 | 6 | 0 | 0.042305  | 4.756639  | -1.860502 |
| 23 | 6 | 0 | 0.248820  | 3.428296  | -2.285992 |
| 24 | 6 | 0 | 0.084613  | 2.358824  | -1.410598 |
| 25 | 6 | 0 | 2.674775  | 0.741617  | 1.411889  |
| 26 | 6 | 0 | 4.028591  | 0.698277  | 1.804677  |
| 27 | 6 | 0 | 4.836124  | -0.292334 | 1.299098  |
| 28 | 6 | 0 | 4.315737  | -1.251305 | 0.394357  |
| 29 | 6 | 0 | 2.943273  | -1.126838 | 0.055512  |
| 30 | 6 | 0 | 5.076005  | -2.299188 | -0.176125 |
| 31 | 6 | 0 | 4.456679  | -3.169614 | -1.048031 |
| 32 | 6 | 0 | 3.095702  | -3.052150 | -1.392943 |
| 33 | 6 | 0 | 2.302464  | -2.039616 | -0.863459 |
| 34 | 1 | 0 | -1.927507 | -0.075028 | -2.815419 |
| 35 | 1 | 0 | -4.288162 | -0.804728 | -3.342131 |
| 36 | 1 | 0 | -5.596640 | -1.992494 | -1.585522 |
| 37 | 1 | 0 | -5.684190 | -2.930831 | 0.800992  |
| 38 | 1 | 0 | -4.496495 | -3.278387 | 2.944704  |
| 39 | 1 | 0 | -2.167019 | -2.497465 | 3.271177  |
| 40 | 1 | 0 | -0.947301 | 0.930828  | 2.644855  |
| 41 | 1 | 0 | -1.382429 | 3.246368  | 3.575515  |

|    |    |   |           |           |           |
|----|----|---|-----------|-----------|-----------|
| 42 | 1  | 0 | -1.081199 | 5.215424  | 2.079523  |
| 43 | 1  | 0 | -0.491289 | 6.102291  | -0.264344 |
| 44 | 1  | 0 | 0.184110  | 5.555713  | -2.582647 |
| 45 | 1  | 0 | 0.541711  | 3.213890  | -3.308179 |
| 46 | 1  | 0 | 2.003462  | 1.509232  | 1.788515  |
| 47 | 1  | 0 | 4.409295  | 1.441933  | 2.495012  |
| 48 | 1  | 0 | 5.883380  | -0.351290 | 1.584807  |
| 49 | 1  | 0 | 6.125980  | -2.401628 | 0.077543  |
| 50 | 1  | 0 | 5.032821  | -3.977205 | -1.490965 |
| 51 | 1  | 0 | 2.637491  | -3.750840 | -2.084338 |
| 52 | 49 | 0 | 0.075127  | -0.319459 | -0.240830 |

**N) mer-In(qCH<sub>3</sub>)<sub>3</sub>**

|    |    |   |           |           |           |
|----|----|---|-----------|-----------|-----------|
| 1  | 7  | 0 | 0.242280  | 1.966333  | -0.436383 |
| 2  | 7  | 0 | 2.162617  | -0.443135 | 0.924800  |
| 3  | 7  | 0 | -1.908458 | -0.855562 | -0.843941 |
| 4  | 8  | 0 | -0.422350 | -2.106029 | 1.073460  |
| 5  | 8  | 0 | -0.981001 | 0.697965  | 1.612836  |
| 6  | 8  | 0 | 1.088984  | -0.954928 | -1.511295 |
| 7  | 6  | 0 | 2.632085  | -0.189214 | 2.135554  |
| 8  | 6  | 0 | 4.003335  | -0.404027 | 2.428937  |
| 9  | 6  | 0 | 4.846263  | -0.882186 | 1.458381  |
| 10 | 6  | 0 | 4.355671  | -1.171199 | 0.160600  |
| 11 | 6  | 0 | 2.977453  | -0.934021 | -0.056573 |
| 12 | 6  | 0 | 5.154212  | -1.670969 | -0.897216 |
| 13 | 6  | 0 | 4.564622  | -1.917977 | -2.117036 |
| 14 | 6  | 0 | 3.191365  | -1.687571 | -2.342911 |
| 15 | 6  | 0 | 2.365730  | -1.201528 | -1.336280 |
| 16 | 6  | 0 | 0.902540  | 2.582600  | -1.408299 |
| 17 | 6  | 0 | 0.660476  | 3.951973  | -1.695951 |
| 18 | 6  | 0 | -0.253881 | 4.661924  | -0.962996 |
| 19 | 6  | 0 | -0.941328 | 4.038543  | 0.105897  |
| 20 | 6  | 0 | -0.646131 | 2.670120  | 0.332595  |
| 21 | 6  | 0 | -1.873297 | 4.708001  | 0.934005  |
| 22 | 6  | 0 | -2.472544 | 4.011408  | 1.960667  |
| 23 | 6  | 0 | -2.183867 | 2.654923  | 2.204751  |
| 24 | 6  | 0 | -1.280569 | 1.952879  | 1.411274  |
| 25 | 6  | 0 | -2.573187 | -0.264164 | -1.821569 |
| 26 | 6  | 0 | -3.876788 | -0.693965 | -2.174007 |
| 27 | 6  | 0 | -4.455682 | -1.737053 | -1.499123 |
| 28 | 6  | 0 | -3.750129 | -2.402815 | -0.466107 |
| 29 | 6  | 0 | -2.450817 | -1.917293 | -0.172000 |
| 30 | 6  | 0 | -4.266503 | -3.508073 | 0.250577  |
| 31 | 6  | 0 | -3.480359 | -4.099048 | 1.216000  |
| 32 | 6  | 0 | -2.183311 | -3.636701 | 1.507582  |
| 33 | 6  | 0 | -1.630019 | -2.548372 | 0.838084  |
| 34 | 1  | 0 | 4.365477  | -0.187658 | 3.427987  |
| 35 | 1  | 0 | 5.898338  | -1.050617 | 1.674849  |
| 36 | 1  | 0 | 6.210771  | -1.854040 | -0.730371 |
| 37 | 1  | 0 | 5.168144  | -2.302315 | -2.934300 |
| 38 | 1  | 0 | 2.746749  | -1.892606 | -3.311237 |
| 39 | 1  | 0 | 1.210274  | 4.419261  | -2.505649 |
| 40 | 1  | 0 | -0.452088 | 5.707803  | -1.184444 |
| 41 | 1  | 0 | -2.094741 | 5.754590  | 0.751382  |
| 42 | 1  | 0 | -3.187490 | 4.515868  | 2.604362  |
| 43 | 1  | 0 | -2.664207 | 2.121902  | 3.018163  |
| 44 | 1  | 0 | -4.398474 | -0.187013 | -2.978514 |
| 45 | 1  | 0 | -5.456793 | -2.073922 | -1.756876 |
| 46 | 1  | 0 | -5.262798 | -3.874731 | 0.025489  |
| 47 | 1  | 0 | -3.864641 | -4.951117 | 1.769918  |
| 48 | 1  | 0 | -1.578492 | -4.123968 | 2.264813  |
| 49 | 49 | 0 | 0.053509  | -0.326322 | 0.156202  |
| 50 | 6  | 0 | 1.924356  | 1.831641  | -2.212442 |
| 51 | 1  | 0 | 2.700795  | 1.422724  | -1.558068 |
| 52 | 1  | 0 | 1.476180  | 0.982676  | -2.735254 |
| 53 | 1  | 0 | 2.397921  | 2.496954  | -2.936059 |

|    |   |   |           |           |           |
|----|---|---|-----------|-----------|-----------|
| 54 | 6 | 0 | -1.915934 | 0.873391  | -2.551914 |
| 55 | 1 | 0 | -2.000868 | 1.804350  | -1.979265 |
| 56 | 1 | 0 | -0.854982 | 0.656343  | -2.705454 |
| 57 | 1 | 0 | -2.387281 | 1.028505  | -3.524505 |
| 58 | 6 | 0 | 1.681478  | 0.329511  | 3.175653  |
| 59 | 1 | 0 | 1.357183  | 1.345514  | 2.926891  |
| 60 | 1 | 0 | 0.780114  | -0.288310 | 3.216478  |
| 61 | 1 | 0 | 2.157363  | 0.345655  | 4.157654  |

**O) mer-In(qNO<sub>2</sub>)<sub>3</sub>**

|    |    |   |           |           |           |
|----|----|---|-----------|-----------|-----------|
| 1  | 7  | 0 | -0.432508 | 1.613159  | 0.807610  |
| 2  | 7  | 0 | -1.960807 | -0.805888 | -1.031437 |
| 3  | 7  | 0 | 2.127610  | -0.280527 | 0.595542  |
| 4  | 8  | 0 | 0.986011  | -1.871010 | -1.225854 |
| 5  | 8  | 0 | 0.317574  | 1.157906  | -1.705936 |
| 6  | 8  | 0 | -0.852646 | -1.288008 | 1.347998  |
| 7  | 6  | 0 | -2.432953 | -0.521947 | -2.229933 |
| 8  | 6  | 0 | -3.719684 | -0.934883 | -2.613563 |
| 9  | 6  | 0 | -4.503598 | -1.641557 | -1.730921 |
| 10 | 6  | 0 | -4.019244 | -1.953540 | -0.428060 |
| 11 | 6  | 0 | -2.706168 | -1.502476 | -0.133201 |
| 12 | 6  | 0 | -4.686187 | -2.672701 | 0.612129  |
| 13 | 6  | 0 | -4.061299 | -2.905763 | 1.824895  |
| 14 | 6  | 0 | -2.771767 | -2.452395 | 2.101993  |
| 15 | 6  | 0 | -2.052356 | -1.741685 | 1.144136  |
| 16 | 6  | 0 | -0.843350 | 1.748994  | 2.055348  |
| 17 | 6  | 0 | -1.062531 | 3.022394  | 2.608281  |
| 18 | 6  | 0 | -0.841201 | 4.147584  | 1.847271  |
| 19 | 6  | 0 | -0.402103 | 4.027622  | 0.497301  |
| 20 | 6  | 0 | -0.222428 | 2.701469  | 0.021843  |
| 21 | 6  | 0 | -0.145251 | 5.072966  | -0.441647 |
| 22 | 6  | 0 | 0.240715  | 4.780788  | -1.738908 |
| 23 | 6  | 0 | 0.406811  | 3.473585  | -2.194825 |
| 24 | 6  | 0 | 0.186091  | 2.394404  | -1.340366 |
| 25 | 6  | 0 | 2.633174  | 0.552049  | 1.485761  |
| 26 | 6  | 0 | 3.968911  | 0.451197  | 1.904425  |
| 27 | 6  | 0 | 4.774059  | -0.535487 | 1.385124  |
| 28 | 6  | 0 | 4.258255  | -1.450376 | 0.423541  |
| 29 | 6  | 0 | 2.898866  | -1.262531 | 0.054281  |
| 30 | 6  | 0 | 4.949292  | -2.517556 | -0.228547 |
| 31 | 6  | 0 | 4.309001  | -3.303805 | -1.171707 |
| 32 | 6  | 0 | 2.975685  | -3.110302 | -1.525044 |
| 33 | 6  | 0 | 2.227521  | -2.094553 | -0.932795 |
| 34 | 1  | 0 | -4.086172 | -0.695438 | -3.604933 |
| 35 | 1  | 0 | -5.493336 | -1.960820 | -2.021244 |
| 36 | 1  | 0 | -4.610807 | -3.460034 | 2.576744  |
| 37 | 1  | 0 | -2.308284 | -2.650916 | 3.061222  |
| 38 | 1  | 0 | -1.404760 | 3.110049  | 3.632915  |
| 39 | 1  | 0 | -1.001556 | 5.128495  | 2.269891  |
| 40 | 1  | 0 | 0.419199  | 5.612712  | -2.410338 |
| 41 | 1  | 0 | 0.713981  | 3.276121  | -3.215069 |
| 42 | 1  | 0 | 4.357110  | 1.153156  | 2.633020  |
| 43 | 1  | 0 | 5.802217  | -0.621018 | 1.704023  |
| 44 | 1  | 0 | 4.880773  | -4.096472 | -1.639876 |
| 45 | 1  | 0 | 2.498133  | -3.743003 | -2.263558 |
| 46 | 49 | 0 | 0.056419  | -0.314264 | -0.255904 |
| 47 | 1  | 0 | -1.777772 | 0.041047  | -2.889480 |
| 48 | 1  | 0 | -0.995668 | 0.828871  | 2.614136  |
| 49 | 1  | 0 | 1.970361  | 1.319378  | 1.876877  |
| 50 | 7  | 0 | -6.036802 | -3.194409 | 0.465500  |
| 51 | 8  | 0 | -6.490516 | -3.876716 | 1.370031  |
| 52 | 8  | 0 | -6.662333 | -2.924575 | -0.552528 |
| 53 | 7  | 0 | 6.339377  | -2.840338 | 0.051847  |
| 54 | 8  | 0 | 6.906813  | -2.252098 | 0.965103  |
| 55 | 8  | 0 | 6.880754  | -3.692753 | -0.633895 |
| 56 | 7  | 0 | -0.266079 | 6.481820  | -0.098475 |

|    |   |   |           |          |           |
|----|---|---|-----------|----------|-----------|
| 57 | 8 | 0 | -0.157551 | 7.302211 | -0.995052 |
| 58 | 8 | 0 | -0.462240 | 6.783936 | 1.072633  |

**P) mer-In(qCl)<sub>3</sub>**

|    |    |   |           |           |           |
|----|----|---|-----------|-----------|-----------|
| 1  | 7  | 0 | -0.451107 | 1.569465  | 0.783863  |
| 2  | 7  | 0 | -1.974884 | -0.846325 | -1.017620 |
| 3  | 7  | 0 | 2.148231  | -0.234293 | 0.568577  |
| 4  | 8  | 0 | 1.027961  | -1.921366 | -1.215227 |
| 5  | 8  | 0 | 0.289320  | 1.092750  | -1.748897 |
| 6  | 8  | 0 | -0.799817 | -1.310363 | 1.358062  |
| 7  | 6  | 0 | -2.494765 | -0.575623 | -2.198371 |
| 8  | 6  | 0 | -3.810227 | -0.962550 | -2.527184 |
| 9  | 6  | 0 | -4.564786 | -1.636434 | -1.596156 |
| 10 | 6  | 0 | -4.025401 | -1.932653 | -0.318797 |
| 11 | 6  | 0 | -2.695187 | -1.506713 | -0.071602 |
| 12 | 6  | 0 | -4.703672 | -2.611463 | 0.724443  |
| 13 | 6  | 0 | -4.074484 | -2.837791 | 1.926094  |
| 14 | 6  | 0 | -2.753533 | -2.408898 | 2.163278  |
| 15 | 6  | 0 | -2.025510 | -1.737819 | 1.188328  |
| 16 | 6  | 0 | -0.844754 | 1.730447  | 2.032895  |
| 17 | 6  | 0 | -1.059603 | 3.015098  | 2.575307  |
| 18 | 6  | 0 | -0.854316 | 4.122133  | 1.785494  |
| 19 | 6  | 0 | -0.443290 | 3.970312  | 0.436966  |
| 20 | 6  | 0 | -0.255450 | 2.641786  | -0.027465 |
| 21 | 6  | 0 | -0.212076 | 5.025254  | -0.479263 |
| 22 | 6  | 0 | 0.174864  | 4.747315  | -1.770003 |
| 23 | 6  | 0 | 0.351771  | 3.425984  | -2.224697 |
| 24 | 6  | 0 | 0.146696  | 2.339058  | -1.382152 |
| 25 | 6  | 0 | 2.654355  | 0.624787  | 1.431462  |
| 26 | 6  | 0 | 4.000753  | 0.562957  | 1.841698  |
| 27 | 6  | 0 | 4.811739  | -0.420521 | 1.328599  |
| 28 | 6  | 0 | 4.295426  | -1.354034 | 0.396108  |
| 29 | 6  | 0 | 2.928072  | -1.215484 | 0.035840  |
| 30 | 6  | 0 | 5.033528  | -2.404319 | -0.201834 |
| 31 | 6  | 0 | 4.427536  | -3.250845 | -1.100721 |
| 32 | 6  | 0 | 3.073699  | -3.105820 | -1.456184 |
| 33 | 6  | 0 | 2.286825  | -2.097583 | -0.912615 |
| 34 | 1  | 0 | -4.208413 | -0.726602 | -3.507068 |
| 35 | 1  | 0 | -5.579384 | -1.945433 | -1.826042 |
| 36 | 1  | 0 | -4.612084 | -3.361650 | 2.710086  |
| 37 | 1  | 0 | -2.280537 | -2.606195 | 3.118913  |
| 38 | 1  | 0 | -1.382260 | 3.113853  | 3.605236  |
| 39 | 1  | 0 | -1.008566 | 5.120690  | 2.181792  |
| 40 | 1  | 0 | 0.346629  | 5.571731  | -2.454772 |
| 41 | 1  | 0 | 0.656528  | 3.238000  | -3.248173 |
| 42 | 1  | 0 | 4.378066  | 1.288336  | 2.552769  |
| 43 | 1  | 0 | 5.852490  | -0.493034 | 1.627027  |
| 44 | 1  | 0 | 5.011797  | -4.049591 | -1.546691 |
| 45 | 1  | 0 | 2.620999  | -3.785404 | -2.169245 |
| 46 | 49 | 0 | 0.069716  | -0.367431 | -0.283726 |
| 47 | 1  | 0 | -1.855449 | -0.037656 | -2.893746 |
| 48 | 1  | 0 | -0.985262 | 0.818682  | 2.608919  |
| 49 | 1  | 0 | 1.982823  | 1.388383  | 1.815445  |
| 50 | 17 | 0 | -6.343001 | -3.160453 | 0.477501  |
| 51 | 17 | 0 | -0.419735 | 6.681000  | 0.036025  |
| 52 | 17 | 0 | 6.718140  | -2.621699 | 0.206243  |

**Q) mer-In(qBr)<sub>3</sub>**

|   |   |   |           |           |           |
|---|---|---|-----------|-----------|-----------|
| 1 | 7 | 0 | -0.208677 | -1.927852 | 1.148115  |
| 2 | 7 | 0 | 0.885035  | -0.776087 | -1.855818 |
| 3 | 7 | 0 | -0.590666 | 1.158571  | 1.865227  |
| 4 | 8 | 0 | -0.149763 | 1.954640  | -0.671833 |
| 5 | 8 | 0 | -1.874629 | -0.681545 | -0.541886 |
| 6 | 8 | 0 | 2.016653  | -0.165210 | 0.507885  |
| 7 | 6 | 0 | 0.276385  | -1.042012 | -2.995463 |

|    |    |   |           |           |           |
|----|----|---|-----------|-----------|-----------|
| 8  | 6  | 0 | 0.981560  | -1.552971 | -4.105138 |
| 9  | 6  | 0 | 2.330584  | -1.792915 | -3.986006 |
| 10 | 6  | 0 | 3.002218  | -1.530039 | -2.766177 |
| 11 | 6  | 0 | 2.219980  | -0.998501 | -1.714022 |
| 12 | 6  | 0 | 4.379143  | -1.774975 | -2.538837 |
| 13 | 6  | 0 | 4.912006  | -1.505881 | -1.299993 |
| 14 | 6  | 0 | 4.124482  | -0.976952 | -0.256676 |
| 15 | 6  | 0 | 2.775668  | -0.676817 | -0.419300 |
| 16 | 6  | 0 | 0.667392  | -2.506354 | 1.949222  |
| 17 | 6  | 0 | 0.372517  | -3.716197 | 2.613237  |
| 18 | 6  | 0 | -0.853116 | -4.308212 | 2.412168  |
| 19 | 6  | 0 | -1.801599 | -3.716899 | 1.540998  |
| 20 | 6  | 0 | -1.421323 | -2.500774 | 0.922437  |
| 21 | 6  | 0 | -3.074355 | -4.263155 | 1.247251  |
| 22 | 6  | 0 | -3.894964 | -3.605230 | 0.360438  |
| 23 | 6  | 0 | -3.506801 | -2.398719 | -0.257703 |
| 24 | 6  | 0 | -2.278578 | -1.794467 | -0.001432 |
| 25 | 6  | 0 | -0.800958 | 0.726245  | 3.093424  |
| 26 | 6  | 0 | -1.183856 | 1.592315  | 4.137283  |
| 27 | 6  | 0 | -1.344126 | 2.930473  | 3.864892  |
| 28 | 6  | 0 | -1.128252 | 3.424822  | 2.556165  |
| 29 | 6  | 0 | -0.746060 | 2.480605  | 1.570882  |
| 30 | 6  | 0 | -1.272308 | 4.783148  | 2.186000  |
| 31 | 6  | 0 | -1.038484 | 5.149967  | 0.881163  |
| 32 | 6  | 0 | -0.658852 | 4.207674  | -0.095210 |
| 33 | 6  | 0 | -0.499227 | 2.856145  | 0.198962  |
| 34 | 1  | 0 | 0.451530  | -1.751678 | -5.029047 |
| 35 | 1  | 0 | 2.896484  | -2.192815 | -4.823609 |
| 36 | 1  | 0 | 5.960909  | -1.700715 | -1.102292 |
| 37 | 1  | 0 | 1.113920  | -4.159787 | 3.267510  |
| 38 | 1  | 0 | -1.105122 | -5.240379 | 2.911413  |
| 39 | 1  | 0 | -4.869967 | -4.013392 | 0.114817  |
| 40 | 1  | 0 | -1.344645 | 1.191965  | 5.131292  |
| 41 | 1  | 0 | -1.638975 | 3.623591  | 4.648577  |
| 42 | 1  | 0 | -1.143439 | 6.186456  | 0.578035  |
| 43 | 49 | 0 | -0.000822 | 0.028574  | 0.015266  |
| 44 | 1  | 0 | -0.793545 | -0.851690 | -3.026143 |
| 45 | 1  | 0 | 1.621057  | -1.995135 | 2.063731  |
| 46 | 1  | 0 | -0.666335 | -0.338246 | 3.267513  |
| 47 | 1  | 0 | 4.996362  | -2.177792 | -3.334697 |
| 48 | 1  | 0 | -3.387084 | -5.192516 | 1.711245  |
| 49 | 1  | 0 | -1.564984 | 5.517964  | 2.928384  |
| 50 | 35 | 0 | -0.354513 | 4.783570  | -1.861684 |
| 51 | 35 | 0 | 4.908374  | -0.670751 | 1.432294  |
| 52 | 35 | 0 | -4.675526 | -1.578344 | -1.487814 |

**R) fac-lnq<sub>3</sub>**

|    |   |   |           |           |           |
|----|---|---|-----------|-----------|-----------|
| 1  | 7 | 0 | -1.565116 | -0.946875 | 0.532744  |
| 2  | 7 | 0 | 1.574284  | -0.858818 | 0.548514  |
| 3  | 7 | 0 | -0.058944 | 1.811359  | 0.516401  |
| 4  | 8 | 0 | 1.318993  | 1.272818  | -1.748565 |
| 5  | 8 | 0 | -1.799020 | 0.482384  | -1.750648 |
| 6  | 8 | 0 | 0.465167  | -1.809292 | -1.730600 |
| 7  | 6 | 0 | 2.110779  | -0.351679 | 1.641461  |
| 8  | 6 | 0 | 3.101738  | -1.036894 | 2.376874  |
| 9  | 6 | 0 | 3.520270  | -2.270713 | 1.939523  |
| 10 | 6 | 0 | 2.968956  | -2.840592 | 0.764341  |
| 11 | 6 | 0 | 1.981593  | -2.074990 | 0.088513  |
| 12 | 6 | 0 | 3.346929  | -4.098798 | 0.242182  |
| 13 | 6 | 0 | 2.743155  | -4.545602 | -0.915182 |
| 14 | 6 | 0 | 1.767226  | -3.792897 | -1.596058 |
| 15 | 6 | 0 | 1.359715  | -2.546050 | -1.128077 |
| 16 | 6 | 0 | -1.408609 | -1.669125 | 1.624557  |
| 17 | 6 | 0 | -2.508349 | -2.156672 | 2.363104  |
| 18 | 6 | 0 | -3.780878 | -1.867969 | 1.930618  |
| 19 | 6 | 0 | -3.983149 | -1.100446 | 0.755456  |

|    |    |   |           |           |           |
|----|----|---|-----------|-----------|-----------|
| 20 | 6  | 0 | -2.815961 | -0.660848 | 0.075365  |
| 21 | 6  | 0 | -5.254070 | -0.763902 | 0.235276  |
| 22 | 6  | 0 | -5.320601 | -0.018623 | -0.924273 |
| 23 | 6  | 0 | -4.170005 | 0.416316  | -1.609383 |
| 24 | 6  | 0 | -2.893789 | 0.111559  | -1.143339 |
| 25 | 6  | 0 | -0.771701 | 2.050648  | 1.599868  |
| 26 | 6  | 0 | -0.637226 | 3.248610  | 2.334460  |
| 27 | 6  | 0 | 0.265782  | 4.192980  | 1.907855  |
| 28 | 6  | 0 | 1.041381  | 3.969790  | 0.742186  |
| 29 | 6  | 0 | 0.830479  | 2.739158  | 0.064547  |
| 30 | 6  | 0 | 1.986391  | 4.888373  | 0.230049  |
| 31 | 6  | 0 | 2.674492  | 4.560909  | -0.920382 |
| 32 | 6  | 0 | 2.468161  | 3.347364  | -1.603588 |
| 33 | 6  | 0 | 1.549117  | 2.407128  | -1.144460 |
| 34 | 1  | 0 | 1.751739  | 0.624538  | 1.958617  |
| 35 | 1  | 0 | 3.516559  | -0.581108 | 3.268424  |
| 36 | 1  | 0 | 4.281569  | -2.822501 | 2.485215  |
| 37 | 1  | 0 | 4.102282  | -4.687644 | 0.752037  |
| 38 | 1  | 0 | 3.029782  | -5.510069 | -1.324771 |
| 39 | 1  | 0 | 1.316577  | -4.165412 | -2.509371 |
| 40 | 1  | 0 | -0.386757 | -1.873250 | 1.935514  |
| 41 | 1  | 0 | -2.332750 | -2.749313 | 3.253473  |
| 42 | 1  | 0 | -4.647196 | -2.228191 | 2.479852  |
| 43 | 1  | 0 | -6.150622 | -1.097443 | 0.747382  |
| 44 | 1  | 0 | -6.293128 | 0.241923  | -1.332267 |
| 45 | 1  | 0 | -4.252672 | 0.992940  | -2.524187 |
| 46 | 1  | 0 | -1.470163 | 1.276793  | 1.909657  |
| 47 | 1  | 0 | -1.244826 | 3.404542  | 3.218497  |
| 48 | 1  | 0 | 0.393937  | 5.123500  | 2.455217  |
| 49 | 1  | 0 | 2.153017  | 5.830644  | 0.741529  |
| 50 | 1  | 0 | 3.401509  | 5.261580  | -1.321069 |
| 51 | 1  | 0 | 3.018524  | 3.119679  | -2.509727 |
| 52 | 49 | 0 | -0.015327 | -0.012048 | -0.869757 |

**S) fac-In(aCH<sub>3</sub>)<sub>3</sub>**

|    |   |   |           |           |           |
|----|---|---|-----------|-----------|-----------|
| 1  | 7 | 0 | -2.096657 | -0.780680 | 0.513674  |
| 2  | 7 | 0 | 1.496679  | -1.043755 | 0.717515  |
| 3  | 7 | 0 | 0.231502  | 1.980258  | 0.256565  |
| 4  | 8 | 0 | 1.433725  | 0.556896  | -1.723385 |
| 5  | 8 | 0 | -1.750498 | 0.759344  | -1.693138 |
| 6  | 8 | 0 | -0.073194 | -2.020065 | -1.298952 |
| 7  | 6 | 0 | 2.223665  | -0.594363 | 1.726451  |
| 8  | 6 | 0 | 3.445550  | -1.221045 | 2.090621  |
| 9  | 6 | 0 | 3.876624  | -2.327383 | 1.411139  |
| 10 | 6 | 0 | 3.095189  | -2.860032 | 0.356194  |
| 11 | 6 | 0 | 1.900392  | -2.165161 | 0.035572  |
| 12 | 6 | 0 | 3.447022  | -4.033017 | -0.350886 |
| 13 | 6 | 0 | 2.605314  | -4.494100 | -1.340041 |
| 14 | 6 | 0 | 1.414594  | -3.821501 | -1.666673 |
| 15 | 6 | 0 | 1.036539  | -2.651993 | -1.013295 |
| 16 | 6 | 0 | -2.238336 | -1.603626 | 1.541807  |
| 17 | 6 | 0 | -3.526061 | -1.940028 | 2.032020  |
| 18 | 6 | 0 | -4.645879 | -1.424904 | 1.433064  |
| 19 | 6 | 0 | -4.521721 | -0.577805 | 0.305895  |
| 20 | 6 | 0 | -3.202592 | -0.294285 | -0.129835 |
| 21 | 6 | 0 | -5.626954 | -0.029744 | -0.387468 |
| 22 | 6 | 0 | -5.394278 | 0.767420  | -1.486953 |
| 23 | 6 | 0 | -4.090600 | 1.044506  | -1.941085 |
| 24 | 6 | 0 | -2.972329 | 0.526690  | -1.293867 |
| 25 | 6 | 0 | -0.431182 | 2.703965  | 1.145085  |
| 26 | 6 | 0 | 0.088136  | 3.938201  | 1.608761  |
| 27 | 6 | 0 | 1.290670  | 4.396598  | 1.135385  |
| 28 | 6 | 0 | 2.001072  | 3.657158  | 0.159191  |
| 29 | 6 | 0 | 1.407650  | 2.440839  | -0.270102 |
| 30 | 6 | 0 | 3.234289  | 4.073209  | -0.394654 |
| 31 | 6 | 0 | 3.828698  | 3.285837  | -1.357911 |



|    |    |   |           |           |           |
|----|----|---|-----------|-----------|-----------|
| 32 | 6  | 0 | 3.240362  | 2.091506  | -1.812499 |
| 33 | 6  | 0 | 2.024129  | 1.638564  | -1.302381 |
| 34 | 1  | 0 | 4.017089  | -0.809601 | 2.916087  |
| 35 | 1  | 0 | 4.807846  | -2.819174 | 1.681382  |
| 36 | 1  | 0 | 4.365639  | -4.552846 | -0.098638 |
| 37 | 1  | 0 | 2.862306  | -5.397389 | -1.885701 |
| 38 | 1  | 0 | 0.760752  | -4.192217 | -2.448541 |
| 39 | 1  | 0 | -3.603069 | -2.608802 | 2.882206  |
| 40 | 1  | 0 | -5.637251 | -1.670338 | 1.805871  |
| 41 | 1  | 0 | -6.633821 | -0.251539 | -0.048865 |
| 42 | 1  | 0 | -6.235172 | 1.190981  | -2.028684 |
| 43 | 1  | 0 | -3.924982 | 1.660203  | -2.818617 |
| 44 | 1  | 0 | -0.477350 | 4.503326  | 2.341483  |
| 45 | 1  | 0 | 1.705053  | 5.335372  | 1.494541  |
| 46 | 1  | 0 | 3.683886  | 5.003240  | -0.062103 |
| 47 | 1  | 0 | 4.774639  | 3.597235  | -1.792104 |
| 48 | 1  | 0 | 3.713730  | 1.498536  | -2.587548 |
| 49 | 49 | 0 | -0.204264 | -0.089685 | -0.662234 |
| 50 | 6  | 0 | -1.744365 | 2.195900  | 1.668280  |
| 51 | 1  | 0 | -1.636429 | 1.205715  | 2.122836  |
| 52 | 1  | 0 | -2.148475 | 2.876879  | 2.418902  |
| 53 | 1  | 0 | -2.470302 | 2.107364  | 0.853707  |
| 54 | 6  | 0 | -1.015645 | -2.194918 | 2.183275  |
| 55 | 1  | 0 | -0.425834 | -2.737698 | 1.438663  |
| 56 | 1  | 0 | -0.374331 | -1.419208 | 2.611699  |
| 57 | 1  | 0 | -1.299696 | -2.884601 | 2.979722  |
| 58 | 6  | 0 | 1.748363  | 0.581205  | 2.537651  |
| 59 | 1  | 0 | 2.147053  | 1.521994  | 2.141097  |
| 60 | 1  | 0 | 0.658942  | 0.649746  | 2.533744  |
| 61 | 1  | 0 | 2.087868  | 0.481086  | 3.571423  |

**T) fac-In(aNO<sub>2</sub>)<sub>3</sub>**

|    |   |   |           |           |           |
|----|---|---|-----------|-----------|-----------|
| 1  | 7 | 0 | -1.588451 | -0.984974 | 0.371568  |
| 2  | 7 | 0 | 1.583164  | -0.850446 | 0.394296  |
| 3  | 7 | 0 | -0.105417 | 1.816524  | 0.342466  |
| 4  | 8 | 0 | 1.260629  | 1.277987  | -1.898170 |
| 5  | 8 | 0 | -1.817196 | 0.406939  | -1.904501 |
| 6  | 8 | 0 | 0.500696  | -1.804422 | -1.864474 |
| 7  | 6 | 0 | 2.101903  | -0.309336 | 1.481242  |
| 8  | 6 | 0 | 3.138552  | -0.938400 | 2.190196  |
| 9  | 6 | 0 | 3.622917  | -2.150526 | 1.757190  |
| 10 | 6 | 0 | 3.081849  | -2.762928 | 0.591621  |
| 11 | 6 | 0 | 2.052214  | -2.040143 | -0.071672 |
| 12 | 6 | 0 | 3.474127  | -3.999014 | -0.003578 |
| 13 | 6 | 0 | 2.883780  | -4.439709 | -1.176671 |
| 14 | 6 | 0 | 1.880175  | -3.721576 | -1.822283 |
| 15 | 6 | 0 | 1.429204  | -2.508480 | -1.301332 |
| 16 | 6 | 0 | -1.404917 | -1.700393 | 1.465253  |
| 17 | 6 | 0 | -2.489430 | -2.227076 | 2.186177  |
| 18 | 6 | 0 | -3.774115 | -1.986006 | 1.758404  |
| 19 | 6 | 0 | -4.005401 | -1.216092 | 0.583043  |
| 20 | 6 | 0 | -2.845449 | -0.747825 | -0.092753 |
| 21 | 6 | 0 | -5.259916 | -0.893622 | -0.014564 |
| 22 | 6 | 0 | -5.318125 | -0.182918 | -1.202245 |
| 23 | 6 | 0 | -4.175164 | 0.268809  | -1.857689 |
| 24 | 6 | 0 | -2.908404 | 0.009775  | -1.333641 |
| 25 | 6 | 0 | -0.839006 | 2.037185  | 1.417144  |
| 26 | 6 | 0 | -0.757394 | 3.248479  | 2.123742  |
| 27 | 6 | 0 | 0.115315  | 4.225004  | 1.703813  |
| 28 | 6 | 0 | 0.925874  | 4.014941  | 0.551935  |
| 29 | 6 | 0 | 0.751120  | 2.770648  | -0.113748 |
| 30 | 6 | 0 | 1.864798  | 4.919146  | -0.028504 |
| 31 | 6 | 0 | 2.538600  | 4.589788  | -1.193388 |
| 32 | 6 | 0 | 2.354038  | 3.371382  | -1.842328 |
| 33 | 6 | 0 | 1.465476  | 2.423567  | -1.333044 |
| 34 | 1 | 0 | 3.551178  | -0.462677 | 3.072233  |

|    |    |   |           |           |           |
|----|----|---|-----------|-----------|-----------|
| 35 | 1  | 0 | 4.417206  | -2.643569 | 2.297972  |
| 36 | 1  | 0 | 3.226518  | -5.381235 | -1.590184 |
| 37 | 1  | 0 | 1.435175  | -4.088365 | -2.739474 |
| 38 | 1  | 0 | -2.304589 | -2.820272 | 3.074251  |
| 39 | 1  | 0 | -4.614454 | -2.380863 | 2.310887  |
| 40 | 1  | 0 | -6.297354 | 0.024553  | -1.618411 |
| 41 | 1  | 0 | -4.247039 | 0.825856  | -2.784167 |
| 42 | 1  | 0 | -1.383337 | 3.405011  | 2.994678  |
| 43 | 1  | 0 | 0.189542  | 5.156807  | 2.244594  |
| 44 | 1  | 0 | 3.234147  | 5.316755  | -1.596353 |
| 45 | 1  | 0 | 2.894976  | 3.136665  | -2.751102 |
| 46 | 49 | 0 | -0.033482 | -0.029416 | -0.980787 |
| 47 | 1  | 0 | -0.377927 | -1.864434 | 1.781724  |
| 48 | 1  | 0 | 1.692143  | 0.644671  | 1.803339  |
| 49 | 1  | 0 | -1.507871 | 1.239881  | 1.731229  |
| 50 | 7  | 0 | 2.172709  | 6.212889  | 0.560233  |
| 51 | 8  | 0 | 1.754629  | 6.458988  | 1.685953  |
| 52 | 8  | 0 | 2.847962  | 6.992790  | -0.091205 |
| 53 | 7  | 0 | 4.493998  | -4.859224 | 0.575935  |
| 54 | 8  | 0 | 4.907694  | -4.603124 | 1.700945  |
| 55 | 8  | 0 | 4.884363  | -5.808931 | -0.083058 |
| 56 | 7  | 0 | -6.529561 | -1.276862 | 0.581406  |
| 57 | 8  | 0 | -6.531832 | -1.698218 | 1.732572  |
| 58 | 8  | 0 | -7.540508 | -1.147111 | -0.089046 |

**U) fac-ln(qCl)<sub>3</sub>**

|    |   |   |           |           |           |
|----|---|---|-----------|-----------|-----------|
| 1  | 7 | 0 | -1.621099 | -0.942767 | 0.387396  |
| 2  | 7 | 0 | 1.533163  | -0.877165 | 0.418879  |
| 3  | 7 | 0 | -0.068552 | 1.804142  | 0.349636  |
| 4  | 8 | 0 | 1.305439  | 1.212300  | -1.901632 |
| 5  | 8 | 0 | -1.825282 | 0.473680  | -1.901434 |
| 6  | 8 | 0 | 0.426344  | -1.847539 | -1.848990 |
| 7  | 6 | 0 | 2.064151  | -0.353756 | 1.507249  |
| 8  | 6 | 0 | 3.081705  | -1.008109 | 2.231333  |
| 9  | 6 | 0 | 3.537255  | -2.227734 | 1.792024  |
| 10 | 6 | 0 | 2.990280  | -2.811398 | 0.622472  |
| 11 | 6 | 0 | 1.971285  | -2.079330 | -0.047725 |
| 12 | 6 | 0 | 3.382891  | -4.054836 | 0.073163  |
| 13 | 6 | 0 | 2.787867  | -4.521830 | -1.076669 |
| 14 | 6 | 0 | 1.785420  | -3.791177 | -1.739720 |
| 15 | 6 | 0 | 1.348512  | -2.560178 | -1.260589 |
| 16 | 6 | 0 | -1.470805 | -1.665770 | 1.479722  |
| 17 | 6 | 0 | -2.574854 | -2.140824 | 2.217191  |
| 18 | 6 | 0 | -3.845641 | -1.841178 | 1.788149  |
| 19 | 6 | 0 | -4.037152 | -1.073600 | 0.612015  |
| 20 | 6 | 0 | -2.867169 | -0.645280 | -0.073834 |
| 21 | 6 | 0 | -5.292071 | -0.710411 | 0.068422  |
| 22 | 6 | 0 | -5.356135 | 0.027864  | -1.091749 |
| 23 | 6 | 0 | -4.195611 | 0.440170  | -1.771085 |
| 24 | 6 | 0 | -2.927090 | 0.120797  | -1.297628 |
| 25 | 6 | 0 | -0.785089 | 2.066331  | 1.425250  |
| 26 | 6 | 0 | -0.630938 | 3.265463  | 2.151167  |
| 27 | 6 | 0 | 0.295984  | 4.188295  | 1.729949  |
| 28 | 6 | 0 | 1.075053  | 3.936685  | 0.572743  |
| 29 | 6 | 0 | 0.844622  | 2.707138  | -0.104052 |
| 30 | 6 | 0 | 2.051417  | 4.812641  | 0.042210  |
| 31 | 6 | 0 | 2.743285  | 4.468662  | -1.097186 |
| 32 | 6 | 0 | 2.506889  | 3.254870  | -1.766607 |
| 33 | 6 | 0 | 1.560909  | 2.344288  | -1.305507 |
| 34 | 1 | 0 | 3.492239  | -0.541391 | 3.119050  |
| 35 | 1 | 0 | 4.320472  | -2.752721 | 2.329031  |
| 36 | 1 | 0 | 3.107596  | -5.476642 | -1.481997 |
| 37 | 1 | 0 | 1.339634  | -4.176407 | -2.649672 |
| 38 | 1 | 0 | -2.407158 | -2.734378 | 3.108375  |
| 39 | 1 | 0 | -4.713365 | -2.191000 | 2.338197  |
| 40 | 1 | 0 | -6.329596 | 0.293255  | -1.492135 |

|    |    |   |           |           |           |
|----|----|---|-----------|-----------|-----------|
| 41 | 1  | 0 | -4.272024 | 1.012389  | -2.688721 |
| 42 | 1  | 0 | -1.242383 | 3.443432  | 3.028166  |
| 43 | 1  | 0 | 0.438818  | 5.117666  | 2.271758  |
| 44 | 1  | 0 | 3.486211  | 5.156656  | -1.488086 |
| 45 | 1  | 0 | 3.059475  | 3.009468  | -2.666268 |
| 46 | 49 | 0 | -0.052031 | -0.039888 | -1.012188 |
| 47 | 1  | 0 | -0.450942 | -1.879476 | 1.790168  |
| 48 | 1  | 0 | 1.679382  | 0.611187  | 1.828083  |
| 49 | 1  | 0 | -1.501621 | 1.309109  | 1.734793  |
| 50 | 17 | 0 | 2.374556  | 6.334976  | 0.834000  |
| 51 | 17 | 0 | 4.628688  | -4.995418 | 0.855659  |
| 52 | 17 | 0 | -6.761104 | -1.206053 | 0.872535  |

**V) fac-ln(qBr)<sub>2</sub>**

|    |    |   |           |           |           |
|----|----|---|-----------|-----------|-----------|
| 1  | 7  | 0 | -1.604924 | -0.922779 | 1.432348  |
| 2  | 7  | 0 | 1.549712  | -0.784670 | 1.455277  |
| 3  | 7  | 0 | -0.112896 | 1.872214  | 1.343843  |
| 4  | 8  | 0 | 1.290924  | 1.254729  | -0.877685 |
| 5  | 8  | 0 | -1.842371 | 0.471820  | -0.864327 |
| 6  | 8  | 0 | 0.437066  | -1.812216 | -0.782868 |
| 7  | 6  | 0 | 2.087168  | -0.237493 | 2.529336  |
| 8  | 6  | 0 | 3.132949  | -0.856876 | 3.244875  |
| 9  | 6  | 0 | 3.609259  | -2.069718 | 2.806515  |
| 10 | 6  | 0 | 3.058503  | -2.680197 | 1.653999  |
| 11 | 6  | 0 | 2.013177  | -1.981478 | 0.996244  |
| 12 | 6  | 0 | 3.491557  | -3.921968 | 1.134124  |
| 13 | 6  | 0 | 2.886975  | -4.421392 | 0.002281  |
| 14 | 6  | 0 | 1.853862  | -3.721245 | -0.647326 |
| 15 | 6  | 0 | 1.380258  | -2.490205 | -0.199744 |
| 16 | 6  | 0 | -1.441879 | -1.632723 | 2.532072  |
| 17 | 6  | 0 | -2.533424 | -2.161005 | 3.252305  |
| 18 | 6  | 0 | -3.807945 | -1.927776 | 2.792212  |
| 19 | 6  | 0 | -4.016148 | -1.176394 | 1.609790  |
| 20 | 6  | 0 | -2.857897 | -0.692410 | 0.948439  |
| 21 | 6  | 0 | -5.288942 | -0.895017 | 1.060967  |
| 22 | 6  | 0 | -5.369238 | -0.160436 | -0.101084 |
| 23 | 6  | 0 | -4.215890 | 0.311148  | -0.753667 |
| 24 | 6  | 0 | -2.929667 | 0.067363  | -0.278927 |
| 25 | 6  | 0 | -0.845868 | 2.151848  | 2.404488  |
| 26 | 6  | 0 | -0.728586 | 3.375627  | 3.096414  |
| 27 | 6  | 0 | 0.182766  | 4.304562  | 2.652437  |
| 28 | 6  | 0 | 0.980625  | 4.036819  | 1.513156  |
| 29 | 6  | 0 | 0.783373  | 2.785368  | 0.874229  |
| 30 | 6  | 0 | 1.938665  | 4.934948  | 0.987881  |
| 31 | 6  | 0 | 2.655730  | 4.570770  | -0.130231 |
| 32 | 6  | 0 | 2.450635  | 3.330775  | -0.761481 |
| 33 | 6  | 0 | 1.517930  | 2.400197  | -0.309134 |
| 34 | 1  | 0 | 3.545575  | -0.368707 | 4.119971  |
| 35 | 1  | 0 | 4.415493  | -2.572129 | 3.334572  |
| 36 | 1  | 0 | 3.206037  | -5.371857 | -0.412788 |
| 37 | 1  | 0 | -2.351227 | -2.741157 | 4.149357  |
| 38 | 1  | 0 | -4.669871 | -2.320917 | 3.325271  |
| 39 | 1  | 0 | -6.336177 | 0.062963  | -0.539894 |
| 40 | 1  | 0 | -1.354782 | 3.564586  | 3.960536  |
| 41 | 1  | 0 | 0.299779  | 5.255678  | 3.165437  |
| 42 | 1  | 0 | 3.394737  | 5.246459  | -0.548149 |
| 43 | 49 | 0 | -0.057686 | 0.003499  | 0.030760  |
| 44 | 1  | 0 | -0.418611 | -1.793927 | 2.862807  |
| 45 | 1  | 0 | 1.683652  | 0.721714  | 2.845247  |
| 46 | 1  | 0 | -1.548456 | 1.387671  | 2.728745  |
| 47 | 1  | 0 | -6.184300 | -1.260844 | 1.551965  |
| 48 | 1  | 0 | 4.292353  | -4.464535 | 1.624976  |
| 49 | 1  | 0 | 2.097388  | 5.897022  | 1.463034  |
| 50 | 35 | 0 | -4.403485 | 1.316427  | -2.375038 |
| 51 | 35 | 0 | 3.480956  | 2.888797  | -2.316297 |
| 52 | 35 | 0 | 1.063076  | -4.472082 | -2.223540 |

**W) Alq<sub>2</sub><sup>+</sup>**

|    |    |   |           |           |           |
|----|----|---|-----------|-----------|-----------|
| 1  | 7  | 0 | 1.475755  | -0.790531 | -0.356019 |
| 2  | 7  | 0 | -1.475789 | 0.790550  | -0.356026 |
| 3  | 8  | 0 | -1.115097 | -1.160017 | 1.340688  |
| 4  | 8  | 0 | 1.115131  | 1.160184  | 1.340579  |
| 5  | 6  | 0 | 1.575013  | -1.815567 | -1.196600 |
| 6  | 6  | 0 | 2.813082  | -2.202601 | -1.731115 |
| 7  | 6  | 0 | 3.955523  | -1.512731 | -1.373767 |
| 8  | 6  | 0 | 3.884491  | -0.425252 | -0.472093 |
| 9  | 6  | 0 | 2.601313  | -0.098723 | 0.015731  |
| 10 | 6  | 0 | 4.984774  | 0.348738  | -0.022229 |
| 11 | 6  | 0 | 4.766712  | 1.372437  | 0.871308  |
| 12 | 6  | 0 | 3.474757  | 1.687171  | 1.365991  |
| 13 | 6  | 0 | 2.387675  | 0.957615  | 0.945911  |
| 14 | 6  | 0 | -1.575064 | 1.815559  | -1.196635 |
| 15 | 6  | 0 | -2.813151 | 2.202554  | -1.731147 |
| 16 | 6  | 0 | -3.955569 | 1.512663  | -1.373773 |
| 17 | 6  | 0 | -3.884507 | 0.425202  | -0.472076 |
| 18 | 6  | 0 | -2.601323 | 0.098738  | 0.015765  |
| 19 | 6  | 0 | -4.984761 | -0.348832 | -0.022215 |
| 20 | 6  | 0 | -4.766650 | -1.372523 | 0.871318  |
| 21 | 6  | 0 | -3.474688 | -1.687179 | 1.366045  |
| 22 | 6  | 0 | -2.387644 | -0.957554 | 0.945996  |
| 23 | 1  | 0 | 0.658287  | -2.341902 | -1.444857 |
| 24 | 1  | 0 | 2.854417  | -3.043120 | -2.412946 |
| 25 | 1  | 0 | 4.920263  | -1.806574 | -1.778707 |
| 26 | 1  | 0 | 5.982409  | 0.122261  | -0.382727 |
| 27 | 1  | 0 | 5.608036  | 1.963076  | 1.218341  |
| 28 | 1  | 0 | 3.332005  | 2.491717  | 2.078657  |
| 29 | 1  | 0 | -0.658340 | 2.341866  | -1.444957 |
| 30 | 1  | 0 | -2.854525 | 3.043052  | -2.413002 |
| 31 | 1  | 0 | -4.920317 | 1.806468  | -1.778722 |
| 32 | 1  | 0 | -5.982405 | -0.122397 | -0.382713 |
| 33 | 1  | 0 | -5.607942 | -1.963216 | 1.218337  |
| 34 | 1  | 0 | -3.331931 | -2.491721 | 2.078713  |
| 35 | 13 | 0 | 0.000008  | 0.000055  | 0.626175  |

**X) Al(qCH<sub>3</sub>)<sub>2</sub><sup>+</sup>**

|    |   |   |           |           |           |
|----|---|---|-----------|-----------|-----------|
| 1  | 7 | 0 | 1.419386  | -0.797519 | 0.174233  |
| 2  | 7 | 0 | -1.419403 | 0.797551  | 0.174205  |
| 3  | 8 | 0 | -1.163185 | -1.109161 | -1.593711 |
| 4  | 8 | 0 | 1.163195  | 1.109214  | -1.593661 |
| 5  | 6 | 0 | 1.436572  | -1.804077 | 1.047048  |
| 6  | 6 | 0 | 2.657742  | -2.179452 | 1.647276  |
| 7  | 6 | 0 | 3.825270  | -1.518116 | 1.329717  |
| 8  | 6 | 0 | 3.821879  | -0.452968 | 0.396087  |
| 9  | 6 | 0 | 2.570915  | -0.128260 | -0.161970 |
| 10 | 6 | 0 | 4.951837  | 0.298795  | -0.015015 |
| 11 | 6 | 0 | 4.789451  | 1.303320  | -0.942560 |
| 12 | 6 | 0 | 3.527295  | 1.616263  | -1.508401 |
| 13 | 6 | 0 | 2.412066  | 0.906411  | -1.126017 |
| 14 | 6 | 0 | -1.436590 | 1.804090  | 1.047055  |
| 15 | 6 | 0 | -2.657759 | 2.179431  | 1.647291  |
| 16 | 6 | 0 | -3.825278 | 1.518072  | 1.329736  |
| 17 | 6 | 0 | -3.821882 | 0.452942  | 0.396093  |
| 18 | 6 | 0 | -2.570918 | 0.128275  | -0.161993 |
| 19 | 6 | 0 | -4.951829 | -0.298842 | -0.015005 |
| 20 | 6 | 0 | -4.789432 | -1.303346 | -0.942569 |
| 21 | 6 | 0 | -3.527274 | -1.616255 | -1.508431 |
| 22 | 6 | 0 | -2.412054 | -0.906387 | -1.126052 |
| 23 | 1 | 0 | 2.659591  | -2.998905 | 2.356704  |
| 24 | 1 | 0 | 4.761726  | -1.815361 | 1.794580  |
| 25 | 1 | 0 | 5.927846  | 0.072897  | 0.401118  |
| 26 | 1 | 0 | 5.652939  | 1.877723  | -1.261041 |
| 27 | 1 | 0 | 3.427806  | 2.403409  | -2.247581 |

|    |    |   |           |           |           |
|----|----|---|-----------|-----------|-----------|
| 28 | 1  | 0 | -2.659627 | 2.998879  | 2.356724  |
| 29 | 1  | 0 | -4.761730 | 1.815286  | 1.794626  |
| 30 | 1  | 0 | -5.927838 | -0.072977 | 0.401145  |
| 31 | 1  | 0 | -5.652910 | -1.877762 | -1.261050 |
| 32 | 1  | 0 | -3.427780 | -2.403391 | -2.247621 |
| 33 | 13 | 0 | 0.000000  | 0.000017  | -0.868839 |
| 34 | 6  | 0 | 0.141652  | -2.506274 | 1.327127  |
| 35 | 1  | 0 | -0.663984 | -1.784667 | 1.502083  |
| 36 | 1  | 0 | -0.142948 | -3.123286 | 0.468209  |
| 37 | 1  | 0 | 0.224404  | -3.149147 | 2.203644  |
| 38 | 6  | 0 | -0.141659 | 2.506275  | 1.327135  |
| 39 | 1  | 0 | 0.663893  | 1.784629  | 1.502336  |
| 40 | 1  | 0 | 0.143093  | 3.123095  | 0.468132  |
| 41 | 1  | 0 | -0.224464 | 3.149325  | 2.203515  |

**Y) Al(qNO<sub>2</sub>)<sub>2</sub><sup>+</sup>**

|    |    |   |           |           |           |
|----|----|---|-----------|-----------|-----------|
| 1  | 7  | 0 | 1.480794  | 0.812078  | -0.229746 |
| 2  | 7  | 0 | -1.478702 | -0.801368 | -0.253078 |
| 3  | 8  | 0 | -1.128181 | 1.139513  | 1.431997  |
| 4  | 8  | 0 | 1.126309  | -1.166785 | 1.409917  |
| 5  | 6  | 0 | 1.554191  | 1.864566  | -1.037743 |
| 6  | 6  | 0 | 2.785027  | 2.291638  | -1.548876 |
| 7  | 6  | 0 | 3.944594  | 1.618099  | -1.219721 |
| 8  | 6  | 0 | 3.897652  | 0.487304  | -0.357225 |
| 9  | 6  | 0 | 2.618341  | 0.131093  | 0.124446  |
| 10 | 6  | 0 | 4.973191  | -0.322369 | 0.118409  |
| 11 | 6  | 0 | 4.759430  | -1.354437 | 1.002159  |
| 12 | 6  | 0 | 3.471644  | -1.682299 | 1.472524  |
| 13 | 6  | 0 | 2.393931  | -0.948214 | 1.038915  |
| 14 | 6  | 0 | -1.548400 | -1.827393 | -1.094805 |
| 15 | 6  | 0 | -2.775514 | -2.230720 | -1.633066 |
| 16 | 6  | 0 | -3.937498 | -1.572180 | -1.282608 |
| 17 | 6  | 0 | -3.897629 | -0.484214 | -0.366444 |
| 18 | 6  | 0 | -2.618038 | -0.132838 | 0.118668  |
| 19 | 6  | 0 | -4.973082 | 0.319933  | 0.118923  |
| 20 | 6  | 0 | -4.756610 | 1.353389  | 1.000463  |
| 21 | 6  | 0 | -3.470310 | 1.669366  | 1.482426  |
| 22 | 6  | 0 | -2.394482 | 0.931459  | 1.050821  |
| 23 | 1  | 0 | 2.817488  | 3.157859  | -2.198457 |
| 24 | 1  | 0 | 4.894781  | 1.950545  | -1.615029 |
| 25 | 1  | 0 | 5.618438  | -1.925811 | 1.336137  |
| 26 | 1  | 0 | 3.324431  | -2.497690 | 2.170891  |
| 27 | 1  | 0 | -2.803819 | -3.066514 | -2.321613 |
| 28 | 1  | 0 | -4.885154 | -1.889392 | -1.696097 |
| 29 | 1  | 0 | -5.613893 | 1.930335  | 1.329220  |
| 30 | 1  | 0 | -3.323296 | 2.476138  | 2.190731  |
| 31 | 13 | 0 | -0.000225 | -0.006063 | 0.712730  |
| 32 | 1  | 0 | 0.625902  | 2.377530  | -1.271150 |
| 33 | 1  | 0 | -0.619270 | -2.333551 | -1.339513 |
| 34 | 7  | 0 | 6.361048  | -0.097745 | -0.316604 |
| 35 | 8  | 0 | 7.237429  | -0.673860 | 0.291546  |
| 36 | 8  | 0 | 6.540906  | 0.643442  | -1.269445 |
| 37 | 7  | 0 | -6.366651 | 0.079405  | -0.289025 |
| 38 | 8  | 0 | -7.183131 | 0.932618  | -0.013974 |
| 39 | 8  | 0 | -6.614173 | -0.964968 | -0.869420 |

**Z) Al(qCl)<sub>2</sub><sup>+</sup>**

|   |   |   |           |           |           |
|---|---|---|-----------|-----------|-----------|
| 1 | 7 | 0 | -1.469910 | -0.792954 | -0.237045 |
| 2 | 7 | 0 | 1.469911  | 0.792955  | -0.237045 |
| 3 | 8 | 0 | 1.123309  | -1.153427 | 1.464188  |
| 4 | 8 | 0 | -1.123310 | 1.153430  | 1.464187  |
| 5 | 6 | 0 | -1.555397 | -1.817121 | -1.080044 |
| 6 | 6 | 0 | -2.785172 | -2.206316 | -1.629324 |
| 7 | 6 | 0 | -3.934673 | -1.520885 | -1.286714 |
| 8 | 6 | 0 | -3.874723 | -0.435323 | -0.383128 |

|    |    |   |           |           |           |
|----|----|---|-----------|-----------|-----------|
| 9  | 6  | 0 | -2.599782 | -0.103141 | 0.124692  |
| 10 | 6  | 0 | -4.973285 | 0.348928  | 0.066247  |
| 11 | 6  | 0 | -4.770297 | 1.369630  | 0.965371  |
| 12 | 6  | 0 | -3.483016 | 1.677344  | 1.470055  |
| 13 | 6  | 0 | -2.391852 | 0.950323  | 1.058409  |
| 14 | 6  | 0 | 1.555398  | 1.817121  | -1.080045 |
| 15 | 6  | 0 | 2.785173  | 2.206315  | -1.629325 |
| 16 | 6  | 0 | 3.934674  | 1.520882  | -1.286716 |
| 17 | 6  | 0 | 3.874724  | 0.435322  | -0.383128 |
| 18 | 6  | 0 | 2.599782  | 0.103142  | 0.124693  |
| 19 | 6  | 0 | 4.973285  | -0.348929 | 0.066248  |
| 20 | 6  | 0 | 4.770296  | -1.369630 | 0.965373  |
| 21 | 6  | 0 | 3.483015  | -1.677343 | 1.470056  |
| 22 | 6  | 0 | 2.391851  | -0.950321 | 1.058410  |
| 23 | 1  | 0 | -2.817970 | -3.045991 | -2.312582 |
| 24 | 1  | 0 | -4.893237 | -1.815193 | -1.703340 |
| 25 | 1  | 0 | -5.621926 | 1.953351  | 1.298308  |
| 26 | 1  | 0 | -3.352114 | 2.480744  | 2.186112  |
| 27 | 1  | 0 | 2.817972  | 3.045990  | -2.312583 |
| 28 | 1  | 0 | 4.893238  | 1.815191  | -1.703341 |
| 29 | 1  | 0 | 5.621925  | -1.953351 | 1.298310  |
| 30 | 1  | 0 | 3.352112  | -2.480742 | 2.186114  |
| 31 | 13 | 0 | 0.000000  | 0.000001  | 0.754285  |
| 32 | 1  | 0 | -0.633734 | -2.339827 | -1.317811 |
| 33 | 1  | 0 | 0.633736  | 2.339829  | -1.317811 |
| 34 | 17 | 0 | -6.563193 | 0.005400  | -0.525948 |
| 35 | 17 | 0 | 6.563193  | -0.005403 | -0.525948 |

**AA) Al(qBr)<sub>2</sub><sup>+</sup>**

|    |    |   |           |           |           |
|----|----|---|-----------|-----------|-----------|
| 1  | 7  | 0 | 1.053544  | -1.336363 | 1.073659  |
| 2  | 7  | 0 | -1.053541 | 1.336357  | 1.073663  |
| 3  | 8  | 0 | -1.483121 | -0.665283 | -0.537738 |
| 4  | 8  | 0 | 1.483119  | 0.665280  | -0.537739 |
| 5  | 6  | 0 | 0.741049  | -2.363426 | 1.860208  |
| 6  | 6  | 0 | 1.726568  | -3.226202 | 2.359294  |
| 7  | 6  | 0 | 3.051223  | -3.014585 | 2.023732  |
| 8  | 6  | 0 | 3.412721  | -1.942421 | 1.177920  |
| 9  | 6  | 0 | 2.362141  | -1.120362 | 0.720217  |
| 10 | 6  | 0 | 4.729890  | -1.634315 | 0.747636  |
| 11 | 6  | 0 | 4.937003  | -0.569645 | -0.095630 |
| 12 | 6  | 0 | 3.863692  | 0.235896  | -0.555010 |
| 13 | 6  | 0 | 2.570241  | -0.025031 | -0.163198 |
| 14 | 6  | 0 | -0.741044 | 2.363417  | 1.860215  |
| 15 | 6  | 0 | -1.726562 | 3.226194  | 2.359302  |
| 16 | 6  | 0 | -3.051217 | 3.014581  | 2.023740  |
| 17 | 6  | 0 | -3.412717 | 1.942420  | 1.177925  |
| 18 | 6  | 0 | -2.362139 | 1.120360  | 0.720220  |
| 19 | 6  | 0 | -4.729887 | 1.634319  | 0.747640  |
| 20 | 6  | 0 | -4.937003 | 0.569651  | -0.095628 |
| 21 | 6  | 0 | -3.863693 | -0.235893 | -0.555009 |
| 22 | 6  | 0 | -2.570242 | 0.025030  | -0.163196 |
| 23 | 1  | 0 | 1.433631  | -4.051806 | 2.996015  |
| 24 | 1  | 0 | 3.823293  | -3.678959 | 2.402279  |
| 25 | 1  | 0 | 5.939180  | -0.327592 | -0.432772 |
| 26 | 1  | 0 | -1.433622 | 4.051795  | 2.996027  |
| 27 | 1  | 0 | -3.823286 | 3.678956  | 2.402289  |
| 28 | 1  | 0 | -5.939180 | 0.327600  | -0.432770 |
| 29 | 13 | 0 | 0.000000  | -0.000003 | 0.143523  |
| 30 | 1  | 0 | -0.310549 | -2.505694 | 2.090514  |
| 31 | 1  | 0 | 0.310554  | 2.505682  | 2.090521  |
| 32 | 1  | 0 | 5.562721  | -2.243948 | 1.081004  |
| 33 | 1  | 0 | -5.562717 | 2.243953  | 1.081010  |
| 34 | 35 | 0 | 4.203116  | 1.688748  | -1.735280 |
| 35 | 35 | 0 | -4.203121 | -1.688742 | -1.735281 |

**AB) Gaq<sub>2</sub><sup>+</sup>**

|    |    |   |           |           |           |
|----|----|---|-----------|-----------|-----------|
| 1  | 7  | 0 | 1.542401  | -0.797651 | -0.430908 |
| 2  | 7  | 0 | -1.542355 | 0.797490  | -0.431028 |
| 3  | 8  | 0 | -1.188768 | -1.190820 | 1.307576  |
| 4  | 8  | 0 | 1.188672  | 1.190921  | 1.307398  |
| 5  | 6  | 0 | 1.644525  | -1.818021 | -1.274096 |
| 6  | 6  | 0 | 2.886393  | -2.199342 | -1.805733 |
| 7  | 6  | 0 | 4.021890  | -1.504028 | -1.441792 |
| 8  | 6  | 0 | 3.942742  | -0.418952 | -0.537035 |
| 9  | 6  | 0 | 2.655750  | -0.097643 | -0.048196 |
| 10 | 6  | 0 | 5.044463  | 0.351708  | -0.089069 |
| 11 | 6  | 0 | 4.829423  | 1.373687  | 0.807143  |
| 12 | 6  | 0 | 3.539316  | 1.684592  | 1.303026  |
| 13 | 6  | 0 | 2.446099  | 0.958910  | 0.885876  |
| 14 | 6  | 0 | -1.644427 | 1.817951  | -1.274127 |
| 15 | 6  | 0 | -2.886291 | 2.199438  | -1.805637 |
| 16 | 6  | 0 | -4.021821 | 1.504140  | -1.441744 |
| 17 | 6  | 0 | -3.942715 | 0.418981  | -0.537095 |
| 18 | 6  | 0 | -2.655738 | 0.097589  | -0.048261 |
| 19 | 6  | 0 | -5.044475 | -0.351663 | -0.089171 |
| 20 | 6  | 0 | -4.829491 | -1.373641 | 0.807045  |
| 21 | 6  | 0 | -3.539404 | -1.684565 | 1.302995  |
| 22 | 6  | 0 | -2.446155 | -0.958916 | 0.885889  |
| 23 | 1  | 0 | 0.730351  | -2.345639 | -1.528174 |
| 24 | 1  | 0 | 2.933578  | -3.037344 | -2.490351 |
| 25 | 1  | 0 | 4.990229  | -1.790153 | -1.843536 |
| 26 | 1  | 0 | 6.040561  | 0.124075  | -0.453064 |
| 27 | 1  | 0 | 5.670903  | 1.963854  | 1.154608  |
| 28 | 1  | 0 | 3.396880  | 2.487480  | 2.017692  |
| 29 | 1  | 0 | -0.730197 | 2.345447  | -1.528254 |
| 30 | 1  | 0 | -2.933444 | 3.037535  | -2.490141 |
| 31 | 1  | 0 | -4.990152 | 1.790372  | -1.843431 |
| 32 | 1  | 0 | -6.040555 | -0.123958 | -0.453171 |
| 33 | 1  | 0 | -5.670985 | -1.963810 | 1.154472  |
| 34 | 1  | 0 | -3.397032 | -2.487415 | 2.017718  |
| 35 | 31 | 0 | -0.000006 | -0.000047 | 0.574170  |

**AC) Inq<sub>2</sub><sup>+</sup>**

|    |   |   |           |           |           |
|----|---|---|-----------|-----------|-----------|
| 1  | 7 | 0 | 1.683301  | 0.827603  | 0.475965  |
| 2  | 7 | 0 | -1.683172 | -0.827241 | 0.476378  |
| 3  | 8 | 0 | -1.361904 | 1.237829  | -1.279652 |
| 4  | 8 | 0 | 1.361793  | -1.237665 | -1.279855 |
| 5  | 6 | 0 | 1.803093  | 1.850607  | 1.315184  |
| 6  | 6 | 0 | 3.044038  | 2.221059  | 1.854904  |
| 7  | 6 | 0 | 4.168911  | 1.506844  | 1.501244  |
| 8  | 6 | 0 | 4.077947  | 0.415926  | 0.605103  |
| 9  | 6 | 0 | 2.789382  | 0.103569  | 0.102440  |
| 10 | 6 | 0 | 5.184835  | -0.361074 | 0.185768  |
| 11 | 6 | 0 | 4.983014  | -1.394342 | -0.699841 |
| 12 | 6 | 0 | 3.699849  | -1.703245 | -1.206148 |
| 13 | 6 | 0 | 2.594449  | -0.972908 | -0.820480 |
| 14 | 6 | 0 | -1.802950 | -1.850473 | 1.315311  |
| 15 | 6 | 0 | -3.043954 | -2.221396 | 1.854584  |
| 16 | 6 | 0 | -4.168887 | -1.507277 | 1.500934  |
| 17 | 6 | 0 | -4.077933 | -0.416088 | 0.605123  |
| 18 | 6 | 0 | -2.789361 | -0.103430 | 0.102691  |
| 19 | 6 | 0 | -5.184896 | 0.360790  | 0.185742  |
| 20 | 6 | 0 | -4.983127 | 1.394203  | -0.699712 |
| 21 | 6 | 0 | -3.699973 | 1.703284  | -1.205919 |
| 22 | 6 | 0 | -2.594498 | 0.973029  | -0.820273 |
| 23 | 1 | 0 | 0.897563  | 2.395272  | 1.565466  |
| 24 | 1 | 0 | 3.097033  | 3.062630  | 2.534691  |
| 25 | 1 | 0 | 5.140450  | 1.778174  | 1.905623  |
| 26 | 1 | 0 | 6.174202  | -0.129081 | 0.565216  |
| 27 | 1 | 0 | 5.827199  | -1.992102 | -1.027177 |

|    |    |   |           |           |           |
|----|----|---|-----------|-----------|-----------|
| 28 | 1  | 0 | 3.561591  | -2.516137 | -1.910450 |
| 29 | 1  | 0 | -0.897326 | -2.394829 | 1.565925  |
| 30 | 1  | 0 | -3.096881 | -3.063265 | 2.534009  |
| 31 | 1  | 0 | -5.140470 | -1.778945 | 1.904979  |
| 32 | 1  | 0 | -6.174268 | 0.128576  | 0.565043  |
| 33 | 1  | 0 | -5.827359 | 1.991893  | -1.027054 |
| 34 | 1  | 0 | -3.561733 | 2.516184  | -1.910217 |
| 35 | 49 | 0 | 0.000007  | 0.000067  | -0.561558 |

**AD) In(qCH<sub>3</sub>)<sub>2</sub><sup>+</sup>**

|    |    |   |           |           |           |
|----|----|---|-----------|-----------|-----------|
| 1  | 7  | 0 | 1.661270  | -0.825827 | 0.325628  |
| 2  | 7  | 0 | -1.660713 | 0.825278  | 0.325865  |
| 3  | 8  | 0 | -1.371015 | -1.242583 | -1.436191 |
| 4  | 8  | 0 | 1.369513  | 1.240951  | -1.437371 |
| 5  | 6  | 0 | 1.739456  | -1.857048 | 1.162952  |
| 6  | 6  | 0 | 2.985001  | -2.210017 | 1.727482  |
| 7  | 6  | 0 | 4.112820  | -1.489068 | 1.411583  |
| 8  | 6  | 0 | 4.046423  | -0.392086 | 0.517409  |
| 9  | 6  | 0 | 2.772110  | -0.089108 | -0.015624 |
| 10 | 6  | 0 | 5.158888  | 0.392839  | 0.131034  |
| 11 | 6  | 0 | 4.973482  | 1.427420  | -0.757729 |
| 12 | 6  | 0 | 3.702313  | 1.725946  | -1.297199 |
| 13 | 6  | 0 | 2.592254  | 0.984316  | -0.943416 |
| 14 | 6  | 0 | -1.737767 | 1.856852  | 1.162877  |
| 15 | 6  | 0 | -2.982896 | 2.211260  | 1.727367  |
| 16 | 6  | 0 | -4.111487 | 1.491352  | 1.411758  |
| 17 | 6  | 0 | -4.046276 | 0.394017  | 0.517952  |
| 18 | 6  | 0 | -2.772286 | 0.089544  | -0.015022 |
| 19 | 6  | 0 | -5.159567 | -0.389892 | 0.131829  |
| 20 | 6  | 0 | -4.975235 | -1.424941 | -0.756596 |
| 21 | 6  | 0 | -3.704364 | -1.724997 | -1.295951 |
| 22 | 6  | 0 | -2.593544 | -0.984442 | -0.942388 |
| 23 | 1  | 0 | 3.032169  | -3.055717 | 2.403916  |
| 24 | 1  | 0 | 5.072757  | -1.761119 | 1.842693  |
| 25 | 1  | 0 | 6.139607  | 0.166926  | 0.536033  |
| 26 | 1  | 0 | 5.821477  | 2.032106  | -1.061443 |
| 27 | 1  | 0 | 3.576170  | 2.537724  | -2.005201 |
| 28 | 1  | 0 | -3.029193 | 3.057226  | 2.403522  |
| 29 | 1  | 0 | -5.071114 | 1.764576  | 1.842816  |
| 30 | 1  | 0 | -6.140051 | -0.162825 | 0.536754  |
| 31 | 1  | 0 | -5.823854 | -2.028840 | -1.060129 |
| 32 | 1  | 0 | -3.579075 | -2.537182 | -2.003641 |
| 33 | 49 | 0 | -0.000209 | -0.001121 | -0.731793 |
| 34 | 6  | 0 | 0.477437  | -2.595754 | 1.501024  |
| 35 | 1  | 0 | -0.021705 | -2.119045 | 2.352306  |
| 36 | 1  | 0 | -0.215877 | -2.613782 | 0.653444  |
| 37 | 1  | 0 | 0.694796  | -3.627315 | 1.782172  |
| 38 | 6  | 0 | -0.474902 | 2.594454  | 1.500267  |
| 39 | 1  | 0 | 0.025167  | 2.116397  | 2.350261  |
| 40 | 1  | 0 | 0.217229  | 2.613061  | 0.651736  |
| 41 | 1  | 0 | -0.691306 | 3.625774  | 1.782997  |

**AE) In(qNO<sub>2</sub>)<sub>2</sub><sup>+</sup>**

|    |   |   |           |           |           |
|----|---|---|-----------|-----------|-----------|
| 1  | 7 | 0 | -1.691854 | 0.856305  | 0.313137  |
| 2  | 7 | 0 | 1.689673  | -0.837103 | 0.355618  |
| 3  | 8 | 0 | 1.375920  | 1.203579  | -1.397019 |
| 4  | 8 | 0 | -1.375042 | -1.257134 | -1.350622 |
| 5  | 6 | 0 | -1.786119 | 1.921391  | 1.100917  |
| 6  | 6 | 0 | -3.020981 | 2.343121  | 1.606748  |
| 7  | 6 | 0 | -4.163668 | 1.639011  | 1.295402  |
| 8  | 6 | 0 | -4.095166 | 0.487514  | 0.462300  |
| 9  | 6 | 0 | -2.810454 | 0.137763  | -0.029372 |
| 10 | 6 | 0 | -5.177835 | -0.330666 | 0.027874  |
| 11 | 6 | 0 | -4.981390 | -1.379637 | -0.839553 |
| 12 | 6 | 0 | -3.702006 | -1.709708 | -1.315967 |



|    |    |   |           |           |           |
|----|----|---|-----------|-----------|-----------|
| 13 | 6  | 0 | -2.604431 | -0.972050 | -0.923773 |
| 14 | 6  | 0 | 1.779886  | -1.856555 | 1.202269  |
| 15 | 6  | 0 | 3.009758  | -2.238551 | 1.749507  |
| 16 | 6  | 0 | 4.155315  | -1.557958 | 1.398685  |
| 17 | 6  | 0 | 4.095961  | -0.475103 | 0.477760  |
| 18 | 6  | 0 | 2.810104  | -0.138634 | -0.020808 |
| 19 | 6  | 0 | 5.177321  | 0.332644  | 0.020922  |
| 20 | 6  | 0 | 4.974404  | 1.377833  | -0.849646 |
| 21 | 6  | 0 | 3.696805  | 1.683726  | -1.346170 |
| 22 | 6  | 0 | 2.603453  | 0.941673  | -0.950543 |
| 23 | 1  | 0 | -3.065506 | 3.223712  | 2.236061  |
| 24 | 1  | 0 | -5.120224 | 1.959664  | 1.685151  |
| 25 | 1  | 0 | -5.843554 | -1.959694 | -1.149315 |
| 26 | 1  | 0 | -3.560209 | -2.541772 | -1.995785 |
| 27 | 1  | 0 | 3.049165  | -3.069391 | 2.443554  |
| 28 | 1  | 0 | 5.108685  | -1.852537 | 1.815724  |
| 29 | 1  | 0 | 5.832719  | 1.964915  | -1.156897 |
| 30 | 1  | 0 | 3.553780  | 2.497132  | -2.047851 |
| 31 | 49 | 0 | 0.000187  | -0.013228 | -0.665576 |
| 32 | 1  | 0 | -0.868782 | 2.456674  | 1.327881  |
| 33 | 1  | 0 | 0.861986  | -2.380631 | 1.451934  |
| 34 | 7  | 0 | -6.555671 | -0.102901 | 0.488444  |
| 35 | 8  | 0 | -7.448315 | -0.613876 | -0.154464 |
| 36 | 8  | 0 | -6.714173 | 0.567231  | 1.496554  |
| 37 | 7  | 0 | 6.563902  | 0.088762  | 0.445897  |
| 38 | 8  | 0 | 7.359532  | 0.990645  | 0.287414  |
| 39 | 8  | 0 | 6.831416  | -1.005473 | 0.915858  |

**AF) ln(qCl)<sub>2</sub><sup>+</sup>**

|    |    |   |           |           |           |
|----|----|---|-----------|-----------|-----------|
| 1  | 7  | 0 | -1.676374 | 0.831056  | 0.351553  |
| 2  | 7  | 0 | 1.676377  | -0.831058 | 0.351566  |
| 3  | 8  | 0 | 1.372073  | 1.227394  | -1.410070 |
| 4  | 8  | 0 | -1.372081 | -1.227413 | -1.410065 |
| 5  | 6  | 0 | -1.779702 | 1.853839  | 1.192906  |
| 6  | 6  | 0 | -3.011343 | 2.228800  | 1.747538  |
| 7  | 6  | 0 | -4.144916 | 1.520743  | 1.410057  |
| 8  | 6  | 0 | -4.068629 | 0.431253  | 0.511411  |
| 9  | 6  | 0 | -2.788263 | 0.110457  | -0.010645 |
| 10 | 6  | 0 | -5.173611 | -0.356831 | 0.092022  |
| 11 | 6  | 0 | -4.986674 | -1.386228 | -0.799775 |
| 12 | 6  | 0 | -3.708761 | -1.688797 | -1.316562 |
| 13 | 6  | 0 | -2.599720 | -0.961361 | -0.939397 |
| 14 | 6  | 0 | 1.779712  | -1.853831 | 1.192931  |
| 15 | 6  | 0 | 3.011356  | -2.228777 | 1.747568  |
| 16 | 6  | 0 | 4.144924  | -1.520719 | 1.410076  |
| 17 | 6  | 0 | 4.068631  | -0.431241 | 0.511416  |
| 18 | 6  | 0 | 2.788262  | -0.110456 | -0.010640 |
| 19 | 6  | 0 | 5.173609  | 0.356841  | 0.092014  |
| 20 | 6  | 0 | 4.986667  | 1.386227  | -0.799796 |
| 21 | 6  | 0 | 3.708751  | 1.688787  | -1.316582 |
| 22 | 6  | 0 | 2.599713  | 0.961353  | -0.939403 |
| 23 | 1  | 0 | -3.054232 | 3.070018  | 2.428404  |
| 24 | 1  | 0 | -5.108479 | 1.795772  | 1.827619  |
| 25 | 1  | 0 | -5.841169 | -1.976441 | -1.113209 |
| 26 | 1  | 0 | -3.583075 | -2.499885 | -2.025069 |
| 27 | 1  | 0 | 3.054251  | -3.069986 | 2.428445  |
| 28 | 1  | 0 | 5.108490  | -1.795739 | 1.827640  |
| 29 | 1  | 0 | 5.841159  | 1.976437  | -1.113239 |
| 30 | 1  | 0 | 3.583060  | 2.499866  | -2.025098 |
| 31 | 49 | 0 | 0.000000  | -0.000013 | -0.697639 |
| 32 | 1  | 0 | -0.868061 | 2.393530  | 1.431859  |
| 33 | 1  | 0 | 0.868075  | -2.393525 | 1.431891  |
| 34 | 17 | 0 | -6.755869 | -0.013380 | 0.708048  |
| 35 | 17 | 0 | 6.755870  | 0.013404  | 0.708040  |

**AG) In(qBr)<sub>2</sub><sup>+</sup>**

|    |    |   |           |           |           |
|----|----|---|-----------|-----------|-----------|
| 1  | 7  | 0 | 1.270266  | -1.438740 | 1.023048  |
| 2  | 7  | 0 | -1.270303 | 1.438808  | 1.023001  |
| 3  | 8  | 0 | -1.722642 | -0.705204 | -0.591665 |
| 4  | 8  | 0 | 1.722674  | 0.705232  | -0.591655 |
| 5  | 6  | 0 | 1.004559  | -2.496281 | 1.784884  |
| 6  | 6  | 0 | 2.020487  | -3.332477 | 2.267880  |
| 7  | 6  | 0 | 3.331024  | -3.052555 | 1.939616  |
| 8  | 6  | 0 | 3.646679  | -1.942524 | 1.124237  |
| 9  | 6  | 0 | 2.565852  | -1.145686 | 0.672318  |
| 10 | 6  | 0 | 4.962100  | -1.594194 | 0.729322  |
| 11 | 6  | 0 | 5.159708  | -0.503782 | -0.081388 |
| 12 | 6  | 0 | 4.072480  | 0.278595  | -0.533375 |
| 13 | 6  | 0 | 2.769327  | -0.012573 | -0.177521 |
| 14 | 6  | 0 | -1.004630 | 2.496372  | 1.784818  |
| 15 | 6  | 0 | -2.020585 | 3.332547  | 2.267794  |
| 16 | 6  | 0 | -3.331113 | 3.052578  | 1.939533  |
| 17 | 6  | 0 | -3.646732 | 1.942521  | 1.124176  |
| 18 | 6  | 0 | -2.565880 | 1.145708  | 0.672273  |
| 19 | 6  | 0 | -4.962142 | 1.594141  | 0.729267  |
| 20 | 6  | 0 | -5.159715 | 0.503705  | -0.081420 |
| 21 | 6  | 0 | -4.072462 | -0.278646 | -0.533392 |
| 22 | 6  | 0 | -2.769318 | 0.012572  | -0.177547 |
| 23 | 1  | 0 | 1.759530  | -4.184338 | 2.883599  |
| 24 | 1  | 0 | 4.134988  | -3.687999 | 2.301123  |
| 25 | 1  | 0 | 6.160318  | -0.226299 | -0.394777 |
| 26 | 1  | 0 | -1.759655 | 4.184429  | 2.883495  |
| 27 | 1  | 0 | -4.135097 | 3.688005  | 2.301023  |
| 28 | 1  | 0 | -6.160317 | 0.226182  | -0.394801 |
| 29 | 49 | 0 | 0.000005  | 0.000041  | 0.074218  |
| 30 | 1  | 0 | -0.039062 | -2.689791 | 2.014692  |
| 31 | 1  | 0 | 0.038984  | 2.689917  | 2.014627  |
| 32 | 1  | 0 | 5.800824  | -2.194104 | 1.065582  |
| 33 | 1  | 0 | -5.800885 | 2.194031  | 1.065513  |
| 34 | 35 | 0 | 4.399474  | 1.771359  | -1.670596 |
| 35 | 35 | 0 | -4.399409 | -1.771440 | -1.670587 |

### S3.3. NBO charges

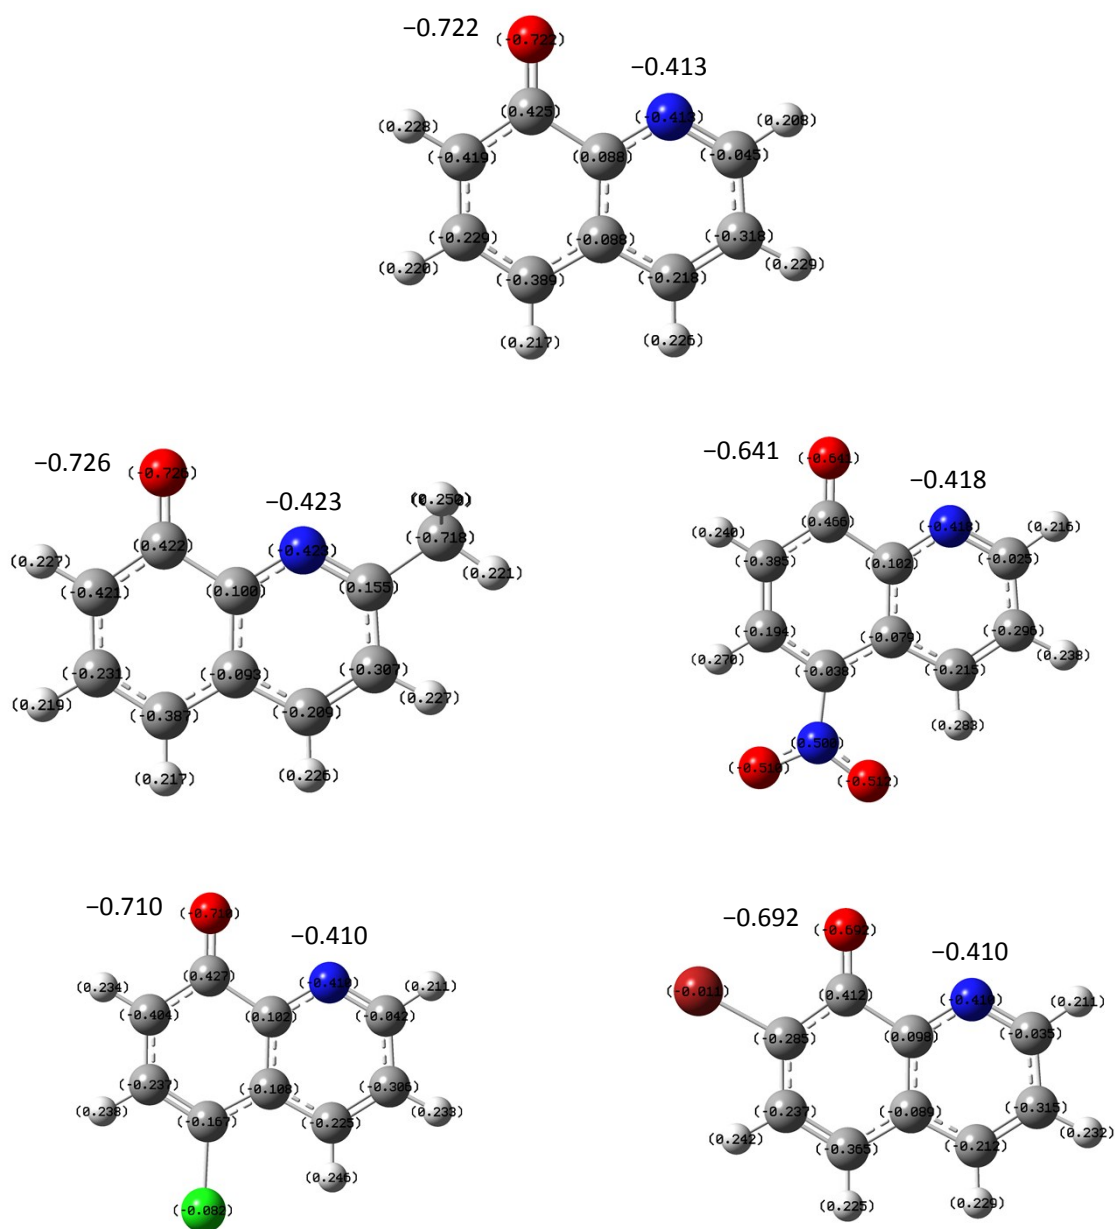

**Figure S49.** Calculated NBO partial point charges, at the M06-2X/6-31+G(d,p) level of theory, for the 8-hydroxyquinolate ligands studied; the NBO charges of the coordinating N and O atoms are highlighted.
